# Supplementary material for: The Analysis of Multiple Genome Comparisons in Genus Escherichia and Its Application to the Discovery of Uncharacterised Metabolic Genes in Uropathogenic Escherichia coli CFT073
Source: Comp Funct Genomics. 2010 Mar 2;2009:782924. doi: 10.1155/2009/782924 (PMC2831201; doi:10.1155/2009/782924)
Supplement: Supplementary file 1 — The supplementary spreadsheet file contains two worksheets. Supplementary Table 1 shows a list of genes in E. coli CFT073, referred to by both GI number (from Genbank) and c number (from the sequencing project), along with a gene label where this has been established. Each of the following columns indicates the presence or absence (by a 1 or 0 respectively) of that gene in the organism indicated at the top of the column, according to the synteny comparison undertaken in the accompanying paper. The three organisms highlighted in grey are the other uropathogenic E. coli included in the comparison. Supplementary Table 2 lists the genes inferred in the acompanying paper to be candidates for metabolic functions that have not been fully characterised. Along with GI number and c number is the name given to the gene in the genome sequencing project. Presence or absence of each gene in the other E. coli in the comparison is indicated. Also shown are the data gathered from the Conserved Domains Database (NCBI), indicating potential functions for these genes. [file 782924.f1.xls]

## Sheet: Supplementary Table 1
Gi number	c number	gene label	Escherichia coli F11	Escherichia coli 536	Escherichia coli UTI89	Escherichia coli E2348	Eschericia coli O42	Escherichia coli B171	Escherichia coli E24377A	Escherichia coli E22	Escherichia coli B7A	Escherichia coli E110019	Escherichia coli 53638	Shigella sonnei 53G	Escherichia coli HS	Escherichia coli K12 MG1655	Escherichia coli O157H7	Escherichia coli O157H7 EDL933	Shigella flexneri 2a str. 201	Shigella dysenteriae Sd197
26245918	c5491	thrL	1	1	1	1	1	1	1	1	1	1	1	1	1	1	1	1	1	1
26245919	c0002	-	0	0	0	0	0	0	0	0	0	0	0	0	0	0	0	0	0	0
26245920	c0003	thrA	1	1	1	1	1	1	1	1	1	1	1	1	1	1	1	1	1	1
26245921	c0004	thrB	1	1	1	1	1	1	1	1	1	1	1	1	1	1	1	1	1	1
26245922	c0005	thrC	1	1	1	1	1	1	1	1	1	1	1	1	1	1	1	1	1	1
26245923	c0006	-	1	1	1	1	1	1	1	1	1	1	1	1	1	1	1	1	1	1
26245924	c0007	yaaX	1	1	1	1	1	1	1	1	1	1	1	1	1	1	1	1	1	1
26245925	c0008	-	1	1	1	1	1	1	1	1	1	1	1	1	1	1	1	1	1	1
26245926	c0009	-	1	1	1	1	1	1	1	1	1	1	1	1	1	1	1	1	1	1
26245927	c0010	yaaA	1	1	1	1	1	1	1	1	1	1	1	1	1	1	1	1	1	1
26245928	c0011	yaaJ	1	1	1	1	1	1	1	1	1	1	1	1	1	1	1	1	1	1
26245929	c0012	talB	1	1	1	1	1	1	1	1	1	1	1	1	1	1	1	1	1	1
26245930	c0013	mogA	1	1	1	1	1	1	1	1	1	1	1	1	1	1	1	1	1	1
26245931	c0014	-	1	1	1	0	0	0	0	0	0	0	0	0	0	0	0	0	0	0
26245932	c0015	yaaH	1	1	1	1	1	1	1	1	1	1	1	1	1	1	1	1	1	1
26245933	c0016	yaaW	1	1	1	1	1	1	1	1	1	1	1	1	1	1	1	1	1	1
26245934	c0017	yaaI	1	1	1	1	1	1	1	1	1	1	1	1	1	1	1	1	1	1
26245935	c0018	-	1	1	1	1	1	1	1	1	1	1	1	1	1	1	1	1	1	1
26245936	c0019	dnaK	1	1	1	1	1	1	1	1	1	1	1	1	1	1	1	1	1	1
26245937	c0020	dnaJ	1	1	1	1	1	1	1	1	1	1	1	1	1	1	1	1	1	1
26245938	c0021	-	1	1	1	1	0	0	0	0	0	0	0	0	0	0	0	0	0	0
26245939	c0022	-	1	1	1	1	0	0	0	0	0	0	0	0	0	0	0	0	0	0
26245940	c0023	-	1	1	1	1	0	0	0	0	0	0	0	0	0	0	0	0	0	0
26245941	c0024	nhaA	1	1	1	1	1	1	1	1	1	1	1	1	1	1	1	1	1	1
26245942	c0025	nhaR	1	1	1	1	1	1	1	1	1	1	1	1	1	1	1	1	1	1
26245943	c0026	-	0	1	1	1	1	1	1	1	1	0	1	1	1	1	1	1	1	1
26245944	c0027	rpsT	1	1	1	1	1	1	1	1	1	1	1	1	1	1	1	1	1	1
26245945	c0028	yaaY	1	1	1	1	1	1	1	1	1	1	1	1	1	1	1	1	1	1
26245946	c0029	ribF	1	1	1	1	1	1	1	1	1	1	1	1	1	1	1	1	1	1
26245947	c0030	ileS	1	1	1	1	1	1	1	1	1	1	1	1	1	1	1	1	1	1
26245948	c0031	lspA	1	1	1	1	1	1	1	1	1	1	1	1	1	1	1	1	1	1
26245949	c0032	slpA	1	1	1	1	1	1	1	1	1	1	1	1	1	1	1	1	1	1
26245950	c0033	lytB	1	1	1	1	1	1	1	1	1	1	1	1	1	1	1	1	1	1
26245951	c0036	-	0	0	1	0	0	0	0	0	0	0	0	0	0	0	0	0	0	0
26245952	c0037	dapB	1	1	1	1	1	1	1	1	1	1	1	1	1	1	1	1	1	1
26245953	c0038	-	1	1	1	1	1	1	1	1	1	1	1	1	1	1	1	1	1	1
26245954	c0039	-	1	1	1	1	1	1	1	1	1	1	1	1	1	1	1	1	1	1
26245955	c0040	carA	1	1	1	1	1	1	1	1	1	1	1	1	1	1	1	1	1	1
26245956	c0041	carB	1	1	1	1	1	1	1	1	1	1	1	1	1	1	1	1	1	1
26245957	c0042	-	1	1	1	1	1	1	1	1	1	1	1	1	1	1	1	1	1	1
26245958	c0043	caiF	1	1	1	1	1	1	1	1	1	1	1	1	1	1	1	1	1	1
26245959	c0044	caiE	1	1	1	1	1	1	1	1	1	1	1	1	1	1	1	1	1	1
26245960	c0045	caiD	1	1	1	1	1	1	1	1	1	1	1	1	1	1	1	1	1	1
26245961	c0046	caiC	1	1	1	1	1	1	1	1	1	1	1	1	1	1	1	1	1	1
26245962	c0047	caiB	1	1	1	1	1	1	1	1	1	1	1	1	1	1	1	1	1	1
26245963	c0048	caiA	1	1	1	1	1	1	1	1	0	1	1	1	1	1	1	1	1	1
26245964	c0049	caiT	1	1	1	1	1	1	1	1	1	1	1	1	1	1	1	1	1	1
26245965	c0050	fixA	1	1	1	1	1	1	1	1	1	1	1	1	1	1	1	1	1	1
26245966	c0053	fixC	1	1	1	1	1	1	1	1	1	1	1	1	1	1	1	1	1	1
26245967	c0054	fixX	1	1	1	1	1	1	1	1	1	1	1	1	1	1	1	1	1	1
26245968	c0055	yaaU	1	1	1	1	1	1	1	1	1	1	1	1	1	1	1	1	1	1
26245969	c0056	yabF	1	1	1	1	1	1	1	1	1	1	1	1	1	1	1	1	1	1
26245970	c0057	kefC	1	1	1	1	1	1	1	1	1	1	1	1	1	1	1	1	1	1
26245971	c0058	folA	1	1	1	1	1	1	1	1	1	1	1	1	1	1	1	1	1	1
26245972	c0059	-	1	1	1	1	1	0	0	0	1	1	0	0	0	0	1	1	0	1
26245973	c0060	-	1	1	1	1	1	0	0	0	0	0	0	0	0	0	1	1	0	1
26245974	c0061	apaH	1	1	1	1	1	1	1	1	1	1	1	1	1	1	1	1	1	1
26245975	c0062	-	1	1	1	1	1	1	1	1	1	1	1	1	1	1	1	1	1	1
26245976	c0063	apaG	1	1	1	1	1	1	1	1	1	1	1	1	1	1	1	1	1	1
26245977	c0064	ksgA	1	1	1	1	1	1	1	1	1	1	1	1	1	1	1	1	1	1
26245978	c0065	pdxA	1	1	1	1	1	1	1	1	1	1	1	1	1	1	1	1	1	1
26245979	c0066	surA	1	1	1	1	1	1	1	1	1	1	1	1	1	1	1	1	1	1
26245980	c0067	imp	1	1	1	1	1	1	1	1	1	1	1	1	1	1	1	1	1	1
26245981	c0068	djlA	1	1	1	1	1	1	1	1	1	1	1	1	1	1	1	1	1	1
26245982	c0069	yabO	1	1	1	1	1	1	1	1	1	1	1	1	1	1	1	1	1	1
26245983	c0070	hepA	1	1	1	1	1	1	1	1	1	1	1	1	1	1	1	1	1	1
26245984	c0071	polB	1	1	1	1	1	1	1	1	1	1	1	1	1	1	1	1	1	1
26245985	c0072	-	0	0	0	0	0	0	0	0	0	0	0	0	0	0	0	0	0	0
26245986	c0073	araD	1	1	1	1	1	1	1	1	1	1	1	1	1	1	1	1	1	1
26245987	c0074	araA	1	1	1	1	1	1	1	1	1	1	1	1	1	1	1	1	1	1
26245988	c0075	araB	1	1	1	1	1	1	1	1	1	1	1	1	1	1	1	1	1	1
26245989	c0076	araC	1	1	1	1	1	1	1	1	1	1	1	1	1	1	1	1	1	1
26245990	c0077	-	1	1	1	0	0	0	0	0	0	0	0	0	0	0	0	0	0	0
26245991	c0078	-	1	1	1	0	0	0	0	0	0	0	0	0	0	0	0	0	0	0
26245992	c0079	-	1	1	1	0	0	1	0	0	0	0	0	0	0	0	0	0	0	0
26245993	c0080	-	1	1	1	0	0	0	0	0	0	0	0	0	0	0	0	0	0	0
26245994	c0081	yabI	1	1	1	1	1	1	1	1	1	1	1	1	1	1	1	1	1	1
26245995	c0082	yabJ	1	1	1	1	1	1	1	1	1	1	1	1	1	1	1	1	1	1
26245996	c0083	thiP	1	1	1	1	1	1	1	1	1	1	1	1	1	1	1	1	1	1
26245997	c0084	tbpA	1	1	1	1	1	1	1	1	1	1	1	1	1	1	1	1	1	1
26245998	c0085	yabN	1	1	1	1	1	1	1	1	1	1	1	1	1	1	1	1	1	1
26245999	c0086	-	0	0	0	0	0	0	0	0	0	0	0	0	0	0	0	0	0	0
26246000	c0087	leuD	1	1	1	1	1	1	1	1	1	1	1	1	1	1	1	1	1	1
26246001	c0088	-	1	1	1	1	1	1	1	1	1	1	1	1	0	1	1	1	1	1
26246002	c0089	leuC	1	1	1	1	1	1	1	1	1	1	1	1	1	1	1	1	1	1
26246003	c0090	leuB	1	1	1	1	1	1	1	1	1	1	1	1	1	1	1	1	1	1
26246004	c0091	leuA	1	1	1	1	1	1	1	1	1	1	1	1	1	1	1	1	1	1
26246005	c5492	leuL	1	1	1	1	1	1	1	1	1	1	1	1	1	1	1	1	1	1
26246006	c0092	-	1	1	1	1	1	1	1	1	1	1	1	1	1	1	1	1	1	0
26246007	c0093	leuO	1	1	1	1	1	1	1	1	1	1	1	1	1	1	1	1	1	1
26246008	c0094	-	1	1	1	1	1	1	1	1	1	1	1	1	1	1	1	1	1	0
26246009	c0095	ilvI	1	1	1	1	1	1	1	1	1	1	1	1	1	1	1	1	1	1
26246010	c0096	ilvH	1	1	1	1	1	1	1	1	1	1	1	1	1	1	1	1	1	1
26246011	c5493	fruL	1	1	1	1	1	1	1	1	1	1	1	1	1	1	1	1	1	1
26246012	c0097	-	1	1	1	1	1	1	1	1	1	1	1	1	1	1	1	1	1	1
26246013	c0098	fruR	1	1	1	1	1	1	1	1	1	1	1	1	1	1	1	1	1	1
26246014	c0099	yabB	1	1	1	1	1	1	1	1	1	1	1	1	1	1	1	1	1	1
26246015	c0100	mraW	1	1	1	1	1	1	1	1	1	1	1	1	1	1	1	1	1	1
26246016	c0101	ftsL	1	1	1	1	1	1	1	1	1	1	1	1	1	1	1	1	1	1
26246017	c0102	ftsI	1	1	1	1	1	1	1	1	1	1	1	1	1	1	1	1	1	1
26246018	c0103	murE	1	1	1	1	1	1	1	1	1	1	1	1	1	1	1	1	1	1
26246019	c0104	murF	0	1	1	1	1	1	1	1	1	1	1	1	1	1	1	1	1	1
26246020	c0105	mraY	0	1	1	1	1	1	1	1	1	1	1	1	1	1	1	1	1	1
26246021	c0106	murD	0	1	1	1	1	1	1	1	1	1	1	1	1	1	1	1	1	1
26246022	c0107	ftsW	1	1	1	1	1	1	1	1	1	1	1	1	1	1	1	1	1	1
26246023	c0108	murG	1	1	1	1	1	1	1	1	1	1	1	1	1	1	1	1	1	1
26246024	c0109	murC	1	1	1	1	1	1	1	1	1	1	1	1	1	1	1	1	1	1
26246025	c0110	ddl	1	1	1	1	1	1	1	1	1	1	1	1	1	1	1	1	1	1
26246026	c0111	ftsQ	1	1	1	1	1	1	1	1	1	1	1	1	1	1	1	1	1	1
26246027	c0112	ftsA	1	1	1	1	1	1	1	1	1	1	1	1	1	1	1	1	1	1
26246028	c0113	ftsZ	1	1	1	1	1	1	1	1	1	1	1	1	1	1	1	1	1	1
26246029	c0114	lpxC	1	1	1	1	1	1	1	1	1	1	1	1	1	1	1	1	1	1
26246030	c0115	yacA	1	1	1	1	1	1	1	1	1	1	1	1	1	1	1	1	1	1
26246031	c0116	secA	1	1	1	1	1	1	1	1	1	1	1	1	1	1	1	1	1	1
26246032	c0117	mutT	1	1	1	1	1	1	1	1	1	1	1	1	1	1	1	1	1	1
26246033	c0118	-	0	0	0	0	0	0	0	0	0	0	0	0	0	0	0	0	0	0
26246034	c0119	-	0	0	0	0	0	0	0	0	0	0	0	0	0	0	0	0	0	0
26246035	c0120	-	1	1	1	1	1	1	1	1	1	1	1	1	1	1	1	1	1	1
26246036	c0121	yacG	1	1	1	1	1	1	1	1	1	1	1	1	1	1	1	1	1	1
26246037	c0122	yacF	1	1	1	1	1	1	1	1	1	1	1	1	1	1	1	1	1	1
26246038	c0123	coaE	1	1	1	1	1	1	1	1	1	1	1	1	1	1	1	1	1	1
26246039	c0124	guaC	1	1	1	1	1	1	1	1	1	1	1	1	1	1	1	1	1	1
26246040	c0125	hofC	1	1	1	1	1	1	1	1	1	1	1	1	1	1	1	1	1	1
26246041	c0126	hofB	1	1	1	1	1	1	1	1	1	1	1	1	1	1	1	1	1	1
26246042	c0127	ppdD	1	1	1	1	1	1	1	1	1	1	1	1	1	1	1	1	1	1
26246043	c0128	nadC	1	1	1	1	1	1	1	1	1	1	1	1	1	1	1	1	1	1
26246044	c0129	ampD	1	1	1	1	1	1	1	1	1	1	1	1	1	1	1	1	1	1
26246045	c0130	ampE	1	1	1	1	1	1	1	1	1	1	1	1	1	1	1	1	1	1
26246046	c0131	aroP	1	1	1	1	1	1	1	1	1	1	1	1	1	1	1	1	1	1
26246047	c0133	-	1	1	1	0	0	0	0	0	0	0	0	0	0	0	0	0	0	0
26246048	c0134	-	1	1	1	0	0	0	0	0	0	0	0	0	0	0	0	0	0	0
26246049	c0136	-	1	1	1	0	0	0	0	0	0	0	0	0	0	0	0	0	0	0
26246050	c0137	-	1	1	1	0	0	0	0	0	0	0	0	0	0	0	0	0	0	0
26246051	c0138	-	0	0	0	0	0	0	0	0	0	0	0	0	0	0	0	0	0	0
26246052	c0139	-	0	0	0	0	0	0	0	0	0	0	0	0	0	0	0	0	0	0
26246053	c0140	pdhR	1	1	1	1	1	1	1	1	1	1	1	1	1	1	1	1	1	1
26246054	c0141	-	1	1	1	1	1	1	1	1	1	1	1	1	1	1	1	1	1	1
26246055	c0142	aceE	1	1	1	1	1	1	1	1	1	1	1	1	1	1	1	1	1	1
26246056	c0145	lpdA	1	1	1	1	1	1	1	1	1	1	1	1	1	1	1	1	1	1
26246057	c0146	yacH	1	1	1	1	1	1	1	1	1	1	1	1	1	1	1	1	1	1
26246058	c0147	acnB	1	1	1	1	1	1	1	1	1	1	1	1	1	1	1	1	1	1
26246059	c0148	yacL	1	1	1	1	1	1	1	1	1	1	1	1	1	1	1	1	1	1
26246060	c0149	speD	1	1	1	1	1	1	1	1	1	1	1	1	1	1	1	1	1	1
26246061	c0150	speE	1	1	1	1	1	1	1	1	1	1	1	1	1	1	1	1	1	1
26246062	c0151	yacC	1	1	1	1	1	1	1	1	1	1	1	1	1	1	1	1	1	1
26246063	c0152	yacK	1	1	1	1	1	1	1	1	1	1	1	1	1	1	1	1	1	1
26246064	c0153	gcd	1	1	1	1	1	1	1	1	1	1	1	1	1	1	1	1	1	1
26246065	c0154	hpt	1	1	1	1	1	1	1	1	1	1	1	1	1	1	1	1	1	1
26246066	c0155	yadF	1	1	1	1	1	1	1	1	1	1	1	1	1	1	1	1	1	1
26246067	c0156	yadG	1	1	1	1	1	1	1	1	1	1	1	1	1	1	1	1	1	1
26246068	c0157	yadH	1	1	1	1	1	1	1	1	1	1	1	1	1	1	1	1	1	1
26246069	c0158	yadI	1	1	1	1	1	1	1	1	1	1	1	1	1	1	1	1	1	1
26246070	c0159	yadE	1	1	1	1	1	1	1	1	1	1	1	1	1	1	1	1	1	1
26246071	c0160	panD	1	1	1	1	1	1	1	1	1	1	1	1	1	1	1	1	1	1
26246072	c0161	-	1	1	1	1	1	1	1	1	1	1	1	1	1	1	1	1	1	1
26246073	c0162	yadD	1	1	1	1	1	1	1	1	1	1	1	1	1	1	1	1	1	1
26246074	c0163	-	1	1	1	1	1	1	1	1	1	1	1	1	1	1	1	1	1	1
26246075	c0164	panC	1	1	1	1	1	1	1	1	1	1	1	1	1	1	1	1	1	1
26246076	c0165	panB	1	1	1	1	1	1	1	1	1	1	1	1	1	1	1	1	1	1
26246077	c0166	yadC	1	1	1	1	1	1	1	1	1	1	1	1	1	1	1	1	1	1
26246078	c0167	yadK	1	1	1	1	1	1	1	1	1	1	1	1	1	1	1	1	0	0
26246079	c0168	yadL	1	1	1	1	1	1	1	1	1	1	1	1	1	1	1	1	0	0
26246080	c0169	yadM	1	1	1	1	1	1	1	1	1	1	1	1	0	1	1	1	0	0
26246081	c0170	htrE	1	1	1	1	1	1	1	1	1	1	1	1	0	1	1	1	0	0
26246082	c0171	ecpD	1	1	1	1	1	1	1	1	1	1	1	1	1	1	1	1	0	0
26246083	c0172	yadN	1	1	1	1	1	1	1	1	1	1	1	1	1	1	1	1	0	0
26246084	c0173	-	1	1	1	1	0	1	0	1	1	1	1	1	0	1	0	0	0	0
26246085	c0174	-	1	1	1	1	0	1	1	1	1	1	1	1	1	1	0	0	0	0
26246086	c0175	folK	1	1	1	1	1	1	1	1	1	1	1	1	1	1	1	1	1	1
26246087	c0176	pcnB	1	1	1	1	1	1	1	1	1	1	1	1	1	1	1	1	1	1
26246088	c0177	yadB	1	1	1	1	1	1	1	1	1	1	1	1	1	1	1	1	1	1
26246089	c0178	dksA	1	1	1	1	1	1	1	1	1	1	1	1	1	1	1	1	1	1
26246090	c0179	sfsA	1	1	1	1	1	1	1	1	1	1	1	1	1	1	1	1	1	1
26246091	c0180	yadP	1	1	1	1	1	1	1	1	1	1	1	1	1	1	1	1	1	1
26246092	c0181	hrpB	1	1	1	1	1	1	1	1	1	1	1	1	1	1	1	1	1	1
26246093	c0182	-	1	1	1	1	1	1	1	1	1	1	1	1	1	1	1	1	1	1
26246094	c0183	mrcB	1	1	1	1	1	1	1	1	1	1	1	1	1	1	1	1	1	1
26246095	c0184	-	1	1	1	1	1	1	1	1	1	1	1	1	1	1	1	1	1	1
26246096	c0185	fhuA	1	1	1	1	1	1	1	1	1	1	1	1	1	1	1	1	1	1
26246097	c0186	fhuC	1	1	1	1	1	1	1	1	1	1	1	1	1	1	1	1	1	1
26246098	c0187	fhuD	1	1	1	1	1	1	1	1	1	1	1	1	1	1	1	1	1	1
26246099	c0188	fhuB	1	1	1	1	1	1	1	1	1	1	1	1	1	1	1	1	1	1
26246100	c0189	hemL	1	1	1	1	1	1	1	1	1	1	1	1	1	1	1	1	1	1
26246101	c0190	yadQ	1	1	1	1	1	1	1	1	1	1	1	1	1	1	1	1	1	1
26246102	c0191	yadR	1	1	1	1	1	1	1	1	1	1	1	1	1	1	1	1	1	1
26246103	c0192	-	1	1	1	1	1	1	1	1	1	1	1	1	1	1	1	1	1	1
26246104	c0193	yadS	1	1	1	1	1	1	1	1	1	1	1	1	1	1	1	1	1	1
26246105	c0194	yadT	1	1	1	1	1	1	1	1	1	1	1	1	1	1	1	1	1	1
26246106	c0195	pfs	1	1	1	1	1	1	1	1	1	1	1	1	1	1	1	1	1	1
26246107	c0196	dgt	1	1	1	1	1	1	1	1	1	1	1	1	1	1	1	1	1	1
26246108	c0197	htrA	1	1	1	1	1	1	1	1	1	1	1	1	1	1	1	1	1	1
26246109	c0198	-	0	0	0	0	0	0	0	0	0	0	0	0	0	0	0	0	0	0
26246110	c0199	yaeG	1	1	1	1	1	1	1	1	1	1	1	1	1	1	1	1	1	1
26246111	c0200	yaeH	1	1	1	1	1	1	1	1	1	1	1	1	1	1	1	1	1	1
26246112	c0201	dapD	1	1	1	1	1	1	1	1	1	1	1	1	1	1	1	1	1	1
26246113	c0202	glnD	1	1	1	1	1	1	1	1	1	1	1	1	1	1	1	1	1	1
26246114	c0203	map	1	1	1	1	1	1	1	1	1	1	1	1	1	1	1	1	1	1
26246115	c0204	rpsB	1	1	1	1	1	1	1	1	1	1	1	1	1	1	1	1	1	1
26246116	c0205	-	1	1	1	1	1	1	1	1	1	1	1	1	1	1	1	1	1	1
26246117	c0206	tsf	1	1	1	1	1	1	1	1	1	1	1	1	1	1	1	1	1	1
26246118	c0207	pyrH	1	1	1	1	1	1	1	1	1	1	1	1	1	1	1	1	1	1
26246119	c0208	frr	1	1	1	1	1	1	1	1	1	1	1	1	1	1	1	1	1	1
26246120	c0211	yaeS	1	1	1	1	1	1	1	1	1	1	1	1	1	1	1	1	1	1
26246121	c0212	cdsA	1	1	1	1	1	1	1	1	1	1	1	1	1	1	1	1	1	1
26246122	c0213	yaeL	1	1	1	1	1	1	1	1	1	1	1	1	1	1	1	1	1	1
26246123	c0214	yaeT	1	1	1	1	1	1	1	1	1	1	1	1	1	1	1	1	1	1
26246124	c0215	hlpA	1	1	1	1	1	1	1	1	1	1	1	1	1	1	1	1	1	1
26246125	c0216	lpxD	1	1	1	1	1	1	1	1	1	1	1	1	1	1	1	1	1	1
26246126	c0217	fabZ	1	1	1	1	1	1	1	1	1	1	1	1	1	1	1	1	1	1
26246127	c0218	lpxA	1	1	1	1	1	1	1	1	1	1	1	1	1	1	1	1	1	1
26246128	c0219	lpxB	1	1	1	1	1	1	1	1	1	1	1	1	1	1	1	1	1	1
26246129	c0220	rnhB	1	1	1	1	1	1	1	1	1	1	1	1	1	1	1	1	1	1
26246130	c0221	dnaE	1	1	1	1	1	1	1	1	1	1	1	1	1	1	1	1	1	1
26246131	c0222	-	1	1	1	1	1	1	1	1	1	1	1	1	1	1	1	1	1	1
26246132	c0223	accA	1	1	1	1	1	1	1	1	1	1	1	1	1	1	1	1	1	1
26246133	c0224	ldcC	1	1	1	1	1	1	1	1	1	1	1	1	1	1	1	1	1	1
26246134	c0225	yaeR	1	1	1	1	1	1	1	1	1	1	1	1	1	1	1	1	1	1
26246135	c0226	mesJ	1	1	1	1	1	1	1	1	1	1	1	1	1	1	1	1	1	1
26246136	c0227	yaeO	1	1	1	1	1	1	1	1	1	1	1	1	1	1	1	1	1	1
26246137	c0228	-	1	1	1	1	1	1	1	1	1	1	1	1	1	1	1	1	1	1
26246138	c0229	yaeQ	1	1	1	1	1	1	1	1	1	1	1	1	1	1	1	1	1	1
26246139	c0230	yaeJ	1	1	1	1	1	1	1	1	1	1	1	1	1	1	1	1	1	1
26246140	c0231	cutF	1	1	1	1	1	1	1	1	1	1	1	1	1	1	1	1	1	1
26246141	c0232	-	0	0	0	0	0	0	0	0	0	0	0	0	0	0	0	0	0	0
26246142	c0233	-	0	0	0	0	0	0	0	0	0	0	0	0	0	0	0	0	0	0
26246143	c0234	yaeF	1	1	1	1	1	1	1	1	1	1	1	1	1	1	1	1	1	1
26246144	c0235	proS	1	1	1	1	1	1	1	1	1	1	1	1	1	1	1	1	1	1
26246145	c0236	yaeB	1	1	1	1	1	1	1	1	1	1	1	1	1	1	1	1	1	1
26246146	c0237	rcsF	1	1	1	1	1	1	1	1	1	1	1	1	1	1	1	1	1	1
26246147	c0238	yaeC	1	1	1	1	1	1	1	1	1	1	1	1	1	1	1	1	1	1
26246148	c0239	yaeE	1	1	1	1	1	1	1	1	1	1	1	1	1	1	1	1	1	1
26246149	c0240	abc	1	1	1	1	1	1	1	1	1	1	1	1	1	1	1	1	1	1
26246150	c0241	yaeD	1	1	1	1	1	1	1	1	1	1	1	1	1	1	1	1	1	1
26246151	c0244	yafB	1	1	1	1	1	1	1	1	1	1	1	1	1	1	1	1	1	1
26246152	c0245	yafC	1	1	1	1	1	1	1	1	1	1	1	1	1	1	1	1	1	1
26246153	c0246	yafD	1	1	1	1	1	1	1	1	1	1	1	1	1	1	1	1	1	1
26246154	c0247	yafE	1	1	1	1	1	1	1	1	1	1	1	1	1	1	1	1	1	1
26246155	c0248	dniR	1	1	1	1	1	1	1	1	1	1	1	1	1	1	1	1	1	1
26246156	c0249	gloB	1	1	1	1	1	1	1	1	1	1	1	1	1	1	1	1	1	1
26246157	c0250	yafS	1	1	1	1	1	1	1	1	1	1	1	1	1	1	1	1	1	1
26246158	c0251	rnhA	1	1	1	1	1	1	1	1	1	1	1	1	1	1	1	1	1	1
26246159	c0252	dnaQ	1	1	1	1	1	1	1	1	1	1	1	1	1	1	1	1	1	1
26246160	c0253	-	0	0	1	1	0	0	0	0	0	1	0	0	0	0	1	0	1	1
26246161	c0254	-	0	0	1	1	0	0	0	0	0	1	0	0	0	0	1	0	1	1
26246162	c0255	-	0	0	1	1	0	0	0	0	0	1	0	0	0	0	1	0	1	1
26246163	c0256	-	0	0	0	0	0	1	0	0	0	0	0	0	0	0	0	0	0	0
26246164	c0257	-	0	0	0	0	0	1	0	0	0	0	0	0	0	0	0	0	0	0
26246165	c0258	-	0	0	0	0	0	1	0	0	0	0	0	0	0	0	0	0	0	0
26246166	c0259	-	0	0	0	0	0	1	0	0	0	0	0	0	0	0	0	0	0	0
26246167	c0260	-	0	0	0	0	0	1	0	0	0	0	0	0	0	0	0	0	0	0
26246168	c0261	-	0	0	0	0	0	0	0	0	0	0	0	0	0	0	0	0	0	0
26246169	c0262	-	0	0	0	0	0	1	0	0	0	0	0	0	0	0	0	0	0	0
26246170	c0263	-	0	0	0	0	0	0	0	0	0	0	0	0	0	0	0	0	0	0
26246171	c0264	-	0	0	0	0	0	0	0	0	0	0	0	0	0	0	0	0	0	0
26246172	c0265	-	0	0	1	1	0	1	1	0	0	1	0	0	0	0	0	0	1	1
26246173	c0268	-	0	0	0	1	0	0	0	0	0	0	0	0	0	0	0	0	0	0
26246174	c0269	-	0	0	1	1	0	0	0	0	1	0	0	0	0	0	0	0	1	1
26246175	c0270	-	0	0	1	1	0	1	1	0	1	0	0	0	0	0	1	0	1	1
26246176	c0271	-	0	0	1	1	0	1	1	0	1	0	0	0	0	0	1	0	0	1
26246177	c0272	-	0	0	1	1	0	1	0	0	1	1	0	0	0	0	1	0	1	1
26246178	c0273	-	0	0	1	1	0	1	1	1	1	1	1	0	0	0	1	0	1	0
26246179	c0274	-	1	0	1	1	0	1	1	1	1	1	1	0	0	0	1	0	1	0
26246180	c0275	-	1	0	1	1	0	1	1	1	1	0	1	0	0	0	0	0	1	1
26246181	c0276	-	1	0	1	0	0	1	1	0	0	0	0	0	0	0	0	0	1	1
26246182	c0277	-	1	0	1	1	0	1	0	0	1	0	0	0	0	0	0	0	1	1
26246183	c0278	-	1	0	1	1	0	1	0	1	1	0	1	0	0	0	0	0	1	1
26246184	c0279	-	0	0	0	1	0	1	0	0	1	0	0	0	0	0	1	0	1	0
26246185	c0280	-	0	0	0	0	0	0	0	0	0	0	0	0	0	0	0	0	0	0
26246186	c0281	-	0	0	0	0	0	0	0	0	0	0	0	0	0	0	0	0	0	1
26246187	c0282	-	0	0	0	0	0	0	0	0	0	0	0	0	0	0	0	0	0	1
26246188	c0283	-	0	0	0	0	0	0	0	0	0	0	0	0	0	0	0	0	0	0
26246189	c0284	-	1	0	1	1	0	0	0	1	0	1	1	0	0	0	1	0	0	1
26246190	c0285	-	1	0	1	1	0	0	0	1	0	1	1	0	0	0	1	0	0	0
26246191	c0286	-	1	0	1	1	0	0	0	1	0	1	1	0	0	0	1	0	0	0
26246192	c0287	-	1	0	1	1	0	0	0	1	0	1	1	0	0	0	1	0	0	0
26246193	c0288	-	0	1	1	1	0	0	1	0	0	0	0	0	0	0	1	0	1	0
26246194	c0289	-	1	0	1	1	0	0	1	0	1	0	0	0	0	0	1	0	1	0
26246195	c0290	-	0	0	0	0	0	0	0	0	0	0	0	0	0	0	0	0	0	0
26246196	c0291	-	0	0	0	0	0	0	0	0	0	0	0	0	0	0	0	0	0	0
26246197	c0292	-	0	0	0	0	0	0	0	0	0	0	0	0	0	0	0	0	0	0
26246198	c0293	-	0	0	0	0	0	0	0	0	0	0	0	0	0	0	0	0	0	0
26246199	c0294	-	1	0	1	0	0	0	0	0	0	0	0	0	0	0	0	0	0	0
26246200	c0295	-	1	0	1	0	0	0	0	0	0	0	0	0	0	0	0	0	0	0
26246201	c0296	-	1	0	1	0	0	0	0	0	0	0	0	0	0	0	0	0	0	0
26246202	c0297	-	1	0	1	0	0	0	0	0	0	0	0	0	0	0	0	0	0	0
26246203	c0298	-	1	1	1	0	0	0	1	1	0	0	0	0	0	0	0	0	0	0
26246204	c0299	-	1	1	1	0	0	0	1	1	0	0	0	0	0	0	0	0	0	0
26246205	c0300	-	0	0	1	0	0	0	0	1	0	0	1	0	0	0	0	0	0	0
26246206	c0301	-	1	1	1	0	0	0	1	1	0	0	1	0	0	0	0	0	0	0
26246207	c0302	-	1	1	1	0	0	0	1	1	0	0	1	0	0	0	0	0	0	0
26246208	c0303	-	1	1	1	0	0	0	1	1	0	0	1	0	0	0	0	0	0	0
26246209	c0304	-	1	1	1	0	0	0	1	1	1	0	1	0	0	0	0	0	0	0
26246210	c0305	-	1	1	1	0	0	0	1	1	1	0	1	0	0	0	0	0	1	0
26246211	c0306	-	1	1	1	0	0	0	1	1	1	0	1	0	0	0	0	0	1	0
26246212	c0307	-	1	1	0	0	0	0	1	0	0	0	0	0	0	0	0	0	1	0
26246213	c0308	-	1	1	0	0	0	0	1	0	0	0	0	0	0	0	0	0	0	0
26246214	c0309	-	1	1	0	0	0	0	1	0	0	0	0	0	0	0	0	0	1	0
26246215	c0310	-	1	1	1	0	0	0	1	1	1	0	1	0	0	0	0	0	1	0
26246216	c0311	-	1	1	1	0	0	0	1	1	1	0	1	0	0	0	0	0	1	0
26246217	c0312	-	1	1	1	0	0	0	0	0	1	0	0	0	0	0	0	0	0	0
26246218	c0313	-	1	1	1	0	0	0	1	0	1	0	0	0	0	0	0	0	0	0
26246219	c0314	-	1	1	0	0	0	0	0	0	0	0	0	0	0	0	0	0	0	0
26246220	c0315	-	0	0	0	0	0	0	0	0	0	0	0	0	0	0	0	0	0	0
26246221	c0316	-	0	0	0	0	0	0	0	0	0	0	0	0	0	0	0	0	0	0
26246222	c0317	-	0	0	0	0	0	0	0	0	0	0	0	0	0	0	0	0	0	0
26246223	c0318	-	0	0	0	0	0	0	0	0	0	0	0	0	0	0	0	0	0	0
26246224	c0319	-	0	0	0	0	0	0	0	0	0	0	0	0	0	0	0	0	0	0
26246225	c0320	-	0	0	0	0	0	0	0	0	0	0	0	0	0	0	0	0	0	0
26246226	c0321	-	0	0	0	0	0	0	0	0	0	0	0	0	0	0	0	0	0	0
26246227	c0322	-	0	0	0	0	0	0	0	0	0	0	0	0	0	0	0	0	0	0
26246228	c0323	-	0	0	0	0	0	0	0	0	0	0	0	0	0	0	0	0	0	0
26246229	c0324	-	0	0	0	0	0	0	0	0	0	0	0	0	0	0	0	0	0	0
26246230	c0325	-	0	0	0	0	0	0	0	0	0	0	0	0	0	0	0	0	0	0
26246231	c0326	-	0	0	0	0	0	0	0	0	0	0	0	0	0	0	0	0	0	0
26246232	c0327	-	0	0	0	0	0	0	0	0	0	0	0	0	0	0	0	0	0	0
26246233	c0328	-	1	1	0	0	1	0	0	0	0	0	0	0	0	0	0	0	0	0
26246234	c0329	-	1	1	0	0	1	0	0	0	0	0	0	0	0	0	0	0	0	0
26246235	c0330	-	1	1	0	0	1	0	0	0	0	0	0	0	0	0	0	0	0	0
26246236	c0331	-	1	1	0	0	1	0	0	0	0	0	0	0	0	0	0	0	0	0
26246237	c0332	-	1	1	0	0	1	0	0	0	0	0	0	0	0	0	0	0	0	0
26246238	c0333	-	1	1	0	0	1	0	0	0	0	0	0	0	0	0	0	0	0	0
26246239	c0334	ulaA	0	0	0	0	1	0	0	0	0	0	0	0	0	0	0	0	0	0
26246240	c0335	-	0	0	0	0	1	0	0	0	0	0	0	0	0	0	0	0	0	0
26246241	c0336	-	0	0	0	0	1	0	0	0	0	0	0	0	0	0	0	0	0	0
26246242	c0337	-	0	0	0	0	1	0	0	0	0	0	0	0	0	0	0	0	0	0
26246243	c0338	-	0	0	0	0	0	0	0	0	0	0	0	0	0	0	0	0	0	0
26246244	c0339	-	0	0	0	0	0	0	0	0	0	0	0	0	0	0	0	0	0	0
26246245	c0340	-	0	0	0	0	0	0	0	0	0	0	0	0	0	0	0	0	0	0
26246246	c0341	-	0	0	0	0	0	0	0	0	0	0	0	0	0	0	0	0	0	0
26246247	c0345	-	0	0	0	0	0	0	0	0	0	0	0	0	0	0	0	0	0	0
26246248	c0348	-	0	0	0	0	0	0	0	0	0	0	0	0	0	0	0	0	0	0
26246249	c0349	-	0	0	0	0	0	0	0	0	0	0	0	0	0	0	0	0	0	1
26246250	c0350	-	0	0	0	0	0	0	0	0	0	0	0	0	0	0	0	0	0	0
26246251	c0351	-	0	0	0	0	0	0	0	0	0	0	0	0	0	0	0	0	0	0
26246252	c0352	-	0	0	0	1	0	0	0	0	0	0	0	0	0	0	0	0	0	0
26246253	c0354	-	0	0	0	1	0	0	0	0	0	0	0	0	0	0	0	0	0	0
26246254	c0355	-	0	0	0	0	0	0	0	1	0	0	1	0	0	0	0	0	0	0
26246255	c0357	-	0	0	0	0	0	0	0	1	0	0	1	0	0	0	0	0	0	0
26246256	c0358	-	0	0	0	0	0	0	0	1	0	0	0	0	0	0	0	0	0	0
26246257	c0359	-	0	0	0	0	0	0	0	0	0	0	0	0	0	0	0	0	0	0
26246258	c0360	-	0	0	0	0	0	0	0	0	0	0	0	0	0	0	0	0	0	0
26246259	c0361	-	0	0	0	0	0	0	0	0	0	0	0	0	0	0	0	0	0	0
26246260	c0362	-	0	0	0	0	0	0	0	0	0	0	0	0	0	0	0	0	0	0
26246261	c0363	-	0	0	0	0	0	0	0	0	0	0	0	0	0	0	0	0	0	0
26246262	c0364	-	0	0	0	0	0	0	0	0	0	0	0	0	0	0	0	0	0	0
26246263	c0365	-	0	0	0	0	0	0	0	0	0	0	0	0	0	0	0	0	0	0
26246264	c0366	-	0	0	0	0	0	0	0	0	0	0	0	0	0	0	0	0	0	0
26246265	c0367	-	0	0	0	0	0	0	0	0	0	0	0	0	0	0	0	0	0	0
26246266	c0368	-	1	1	1	0	1	0	0	0	0	0	0	0	0	0	0	0	0	0
26246267	c0369	yafV	1	1	1	1	1	1	1	1	1	1	1	1	1	1	1	1	1	1
26246268	c0370	ykfE	1	1	1	1	1	1	1	1	1	1	1	1	1	1	1	1	1	1
26246269	c0371	fadE	1	1	1	1	1	1	1	1	1	1	1	1	1	1	1	1	1	1
26246270	c0372	gmhA	1	1	1	1	1	1	1	1	1	1	1	1	1	1	1	1	1	1
26246271	c0373	yafJ	1	1	1	1	1	1	1	1	1	1	1	1	1	1	1	1	1	1
26246272	c0374	yafK	1	1	1	1	1	1	1	1	1	1	1	1	1	1	1	1	1	1
26246273	c0375	-	1	1	1	1	1	0	0	0	0	0	0	0	0	0	0	0	1	0
26246274	c0376	yafL	1	1	1	1	1	1	1	1	1	1	1	1	1	1	1	1	1	1
26246275	c0377	fhiA	1	1	1	1	1	1	1	1	1	1	1	1	1	1	1	1	1	0
26246276	c0378	mbhA	1	1	1	1	1	1	1	1	1	1	1	1	1	1	1	1	1	1
26246277	c0379	dinP	1	1	1	1	1	1	1	1	1	1	1	1	1	1	1	1	1	1
26246278	c0380	yafP	1	1	1	1	1	1	1	1	1	1	1	1	1	1	1	1	1	1
26246279	c0381	-	1	1	1	1	1	1	1	1	1	1	1	1	1	1	1	1	1	1
26246280	c0382	prfH	1	1	1	1	1	1	1	1	1	1	1	1	1	1	1	1	1	1
26246281	c0383	pepD	1	1	1	1	1	1	1	1	1	1	1	1	1	1	1	1	1	1
26246282	c0384	gpt	1	1	1	1	1	1	1	1	1	1	1	1	1	1	1	1	1	1
26246283	c0385	-	1	1	1	1	1	1	1	1	1	1	1	1	1	1	1	1	1	1
26246284	c0386	yafA	1	1	1	1	1	1	1	1	1	1	1	1	1	1	1	1	1	1
26246285	c0387	crl	1	1	1	1	1	1	1	1	1	1	1	1	1	1	1	1	1	1
26246286	c0388	phoE	1	1	1	1	1	1	1	1	1	1	1	1	1	1	1	1	1	0
26246287	c0389	proB	1	1	1	1	1	1	1	1	1	1	1	1	1	1	1	1	1	1
26246288	c0390	proA	1	1	1	1	1	1	1	1	1	1	1	1	1	1	1	1	1	1
26246289	c0391	-	1	1	1	0	0	0	0	0	0	0	0	0	1	0	0	0	0	0
26246290	c0392	-	1	1	1	0	0	0	0	0	0	0	0	0	0	0	0	0	0	0
26246291	c0393	-	1	1	1	0	0	0	0	0	0	0	0	0	0	0	0	0	0	0
26246292	c0394	-	1	1	1	0	0	0	0	0	0	0	0	0	0	0	0	0	0	0
26246293	c0395	-	1	1	1	0	0	0	0	0	0	0	0	0	0	0	0	0	0	0
26246294	c0396	-	1	1	1	0	0	0	0	0	0	0	0	0	0	0	0	0	0	0
26246295	c0397	-	1	1	1	0	0	0	0	0	0	0	0	0	0	0	0	0	0	0
26246296	c0398	-	1	1	1	1	0	0	0	0	0	0	0	0	0	0	0	0	0	0
26246297	c0399	yagU	1	1	1	1	1	1	1	1	1	0	1	0	0	1	1	1	0	0
26246298	c0400	yagV	1	1	1	1	1	1	1	1	1	0	1	0	0	1	1	1	0	0
26246299	c0401	yagW	1	1	1	1	1	1	1	1	1	0	1	0	0	1	1	1	0	0
26246300	c0402	yagX	1	1	1	1	1	1	1	1	1	0	1	0	0	1	1	1	0	0
26246301	c0403	yagY	1	1	1	1	1	1	1	1	1	0	1	0	0	1	1	1	0	0
26246302	c0404	matB	1	1	1	1	1	1	1	1	1	0	1	0	1	1	1	1	0	0
26246303	c0405	matA	1	1	1	1	1	1	1	1	1	0	1	0	1	1	1	1	0	0
26246304	c0406	-	1	1	1	1	1	1	1	1	1	1	1	0	1	1	1	1	0	0
26246305	c0407	ykgM	1	1	1	1	1	1	1	1	1	1	1	0	1	1	1	1	0	0
26246306	c0408	-	1	1	1	1	1	1	1	1	1	1	1	0	1	1	1	1	0	0
26246307	c0409	-	1	1	1	1	1	0	0	0	0	0	0	0	0	0	1	1	0	0
26246308	c0410	-	1	1	1	1	1	0	0	0	0	0	0	0	0	0	1	1	0	0
26246309	c0411	-	1	1	1	1	1	0	0	0	0	0	0	0	0	0	1	1	0	0
26246310	c0412	-	1	1	1	1	1	0	0	0	0	0	0	0	0	0	0	0	0	0
26246311	c0413	-	1	1	1	1	1	0	0	0	0	0	0	0	0	0	0	0	0	0
26246312	c0414	-	1	1	1	1	1	1	1	1	0	0	1	0	1	0	1	1	0	0
26246313	c0415	eaeH	1	1	1	1	1	1	1	1	1	1	1	0	1	0	1	1	0	0
26246314	c0416	ykgA	1	1	1	1	1	1	1	1	1	1	1	0	1	1	1	1	0	0
26246315	c0417	-	1	1	1	1	1	1	1	1	1	1	1	1	1	0	1	1	0	0
26246316	c0418	ykgB	1	1	1	1	1	1	1	1	1	1	1	1	1	1	1	1	0	0
26246317	c0419	ykgI	1	1	1	1	1	1	1	1	1	1	1	1	1	1	1	1	0	0
26246318	c0420	ykgC	1	1	1	1	1	1	1	1	1	1	1	1	1	1	1	1	0	0
26246319	c0421	ykgD	1	1	1	1	1	1	1	1	1	1	1	1	1	1	1	1	0	0
26246320	c0422	ykgE	1	1	1	1	1	1	1	1	1	1	1	1	1	1	1	1	0	0
26246321	c0423	ykgF	1	1	1	1	1	1	1	1	1	1	1	1	1	1	1	1	0	0
26246322	c0424	ykgG	1	1	1	1	1	1	1	1	1	1	1	1	1	1	1	1	0	0
26246323	c0425	ykgH	1	1	1	1	1	1	1	1	1	1	1	1	1	1	1	1	0	0
26246324	c0426	-	1	1	1	0	0	0	0	0	0	0	0	0	1	0	1	1	0	0
26246325	c0427	-	1	1	1	0	0	0	0	0	0	0	0	0	1	0	1	1	0	0
26246326	c0428	-	1	1	1	0	0	0	0	0	0	0	0	0	1	0	1	1	0	0
26246327	c0429	-	1	1	1	0	0	0	0	0	0	0	0	0	1	0	1	1	0	0
26246328	c0430	-	1	1	1	0	0	0	0	0	0	0	0	0	1	0	1	1	0	0
26246329	c0431	betA	1	1	1	1	1	1	1	1	1	1	1	1	1	1	1	1	0	0
26246330	c0432	betB	1	1	1	1	1	1	1	1	1	1	1	1	1	1	1	1	0	0
26246331	c0433	betI	1	1	1	1	1	1	1	1	1	1	1	1	1	1	1	1	0	0
26246332	c0434	betT	1	1	1	1	1	1	1	1	1	1	1	1	1	1	1	1	0	0
26246333	c0435	-	1	1	1	1	1	1	1	1	1	1	1	1	1	1	1	1	0	0
26246334	c0436	yahB	1	1	1	1	1	1	1	1	1	1	1	1	1	1	1	1	0	0
26246335	c0437	yahC	1	1	1	1	1	1	1	1	1	1	1	1	1	1	1	1	0	0
26246336	c0438	-	1	1	1	1	1	1	1	1	1	1	1	1	1	1	1	1	0	0
26246337	c0439	yahD	1	1	1	1	1	1	1	1	1	1	1	1	1	1	1	1	0	0
26246338	c0440	yahE	1	1	1	1	1	1	1	1	1	1	1	1	1	1	1	1	0	0
26246339	c0441	-	1	1	1	1	1	1	1	1	1	1	1	1	1	1	1	1	0	0
26246340	c0444	-	1	1	1	1	1	1	1	1	1	1	1	1	1	1	1	1	0	0
26246341	c0445	yahJ	1	1	1	1	1	1	1	1	1	1	1	1	1	1	1	1	0	0
26246342	c0446	-	1	1	1	1	0	1	1	1	1	1	1	1	1	1	1	1	0	0
26246343	c0447	yahK	1	1	1	1	1	1	1	1	1	1	1	1	1	1	1	1	0	0
26246344	c0448	yahN	1	1	1	1	1	1	1	1	1	1	1	1	1	1	1	1	0	0
26246345	c0449	yahO	1	1	1	1	1	1	1	1	1	1	1	0	1	1	1	1	0	0
26246346	c0450	prpR	1	1	1	1	1	1	1	1	1	1	1	0	1	1	1	1	0	0
26246347	c0451	prpB	1	1	1	1	1	1	1	1	1	1	1	0	1	1	1	1	0	0
26246348	c0452	prpC	1	1	1	1	1	1	1	1	1	1	1	0	1	1	1	1	0	0
26246349	c0453	prpD	1	1	1	1	1	1	1	1	1	1	1	0	1	1	1	1	0	0
26246350	c0454	prpE	1	1	1	1	1	1	1	1	1	1	1	0	1	1	1	1	0	0
26246351	c0455	codB	1	1	1	1	1	1	1	1	1	0	1	0	1	1	1	1	0	0
26246352	c0456	codA	1	1	1	1	1	1	1	1	1	0	1	0	1	1	1	1	0	0
26246353	c0457	lacA	1	1	1	1	1	1	0	1	0	0	1	0	0	1	1	1	0	0
26246354	c0458	lacY	1	1	1	1	1	1	1	1	1	0	1	0	1	1	1	1	0	0
26246355	c0459	lacZ	1	1	1	1	1	1	1	1	1	0	1	1	1	1	1	1	0	0
26246356	c0460	-	1	1	1	1	1	1	1	1	1	0	1	1	1	1	1	1	0	0
26246357	c0462	yaiL	1	1	1	1	1	1	1	1	1	0	1	1	1	1	1	1	0	0
26246358	c0463	-	1	1	1	1	1	1	1	1	1	0	1	1	1	1	1	1	0	0
26246359	c0464	yaiM	1	1	1	1	1	1	1	1	1	1	1	1	1	1	1	1	0	0
26246360	c0465	adhC	1	1	1	1	1	1	1	1	1	1	1	1	1	1	1	1	0	0
26246361	c0466	yaiN	1	1	1	1	1	1	1	1	1	1	1	1	1	1	1	1	0	0
26246362	c0467	-	1	1	1	0	1	1	1	1	1	1	1	1	1	1	0	0	0	0
26246363	c0468	-	1	1	1	0	1	1	1	1	1	1	1	1	1	1	0	0	0	0
26246364	c0469	-	1	1	1	0	1	1	1	1	1	1	1	1	1	1	0	0	0	0
26246365	c0470	-	1	1	1	0	1	1	1	1	1	1	1	1	1	1	0	0	0	0
26246366	c0471	-	1	1	1	1	1	1	1	1	1	1	1	1	1	1	1	1	0	1
26246367	c0472	tauA	1	1	1	1	1	1	1	1	1	1	1	1	1	1	1	1	1	1
26246368	c0473	tauB	1	1	1	1	1	1	1	1	1	1	1	1	1	1	1	1	1	1
26246369	c0474	-	1	1	1	1	1	1	1	1	1	1	1	1	1	1	1	1	1	1
26246370	c0475	tauC	1	1	1	1	1	1	1	1	1	1	1	1	1	1	1	1	1	1
26246371	c0476	tauD	1	1	1	1	1	1	1	1	1	1	1	1	1	1	1	1	1	1
26246372	c0477	hemB	1	1	1	1	1	1	1	1	1	1	1	1	1	1	1	1	1	1
26246373	c0478	-	1	1	1	1	1	1	1	1	1	1	1	1	1	1	1	1	1	1
26246374	c0479	yaiV	1	1	1	1	1	1	1	1	1	1	1	1	1	1	1	1	1	1
26246375	c0480	yaiH	1	1	1	1	1	1	1	1	1	1	1	1	1	1	1	1	1	1
26246376	c0481	-	1	1	1	1	1	1	1	1	1	1	1	1	1	1	1	1	1	1
26246377	c0482	sbmA	1	1	1	1	1	1	1	1	1	1	1	1	1	1	1	1	1	1
26246378	c0483	yaiW	1	1	1	1	1	1	1	1	1	1	1	1	1	1	1	1	1	1
26246379	c0484	yaiY	1	1	1	1	1	1	1	1	1	1	1	1	1	1	1	1	1	1
26246380	c0485	-	1	1	1	1	1	1	1	1	1	1	1	1	1	1	1	1	1	1
26246381	c0486	yaiZ	1	1	1	1	1	1	1	1	1	1	1	1	1	1	1	1	1	1
26246382	c0487	ddl	1	1	1	1	1	1	1	1	1	1	1	1	1	1	1	1	1	1
26246383	c0488	-	1	1	1	1	1	1	1	1	1	1	1	1	1	1	1	1	1	1
26246384	c0489	yaiB	1	1	1	1	1	1	1	1	1	1	1	1	1	1	1	1	1	1
26246385	c0490	phoA	1	1	1	1	1	1	1	1	1	1	1	1	1	1	1	1	1	1
26246386	c0491	psiF	1	1	1	1	1	1	1	1	1	1	1	1	1	1	1	1	1	1
26246387	c0492	yaiC	1	1	1	1	1	1	1	1	1	1	1	1	1	1	1	1	1	1
26246388	c0493	proC	1	1	1	1	1	1	1	1	1	1	1	1	1	1	1	1	1	1
26246389	c0494	yaiI	1	1	1	1	1	1	1	1	1	1	1	1	1	1	1	1	1	1
26246390	c0495	aroL	1	1	1	1	1	1	1	1	1	1	1	1	1	1	1	1	1	1
26246391	c0496	yaiA	1	1	1	1	1	1	1	1	1	1	1	1	1	1	1	1	1	1
26246392	c0497	-	1	1	1	1	1	1	1	1	1	1	1	1	1	1	1	1	1	1
26246393	c0498	aroM	1	1	1	1	1	1	1	1	1	1	1	1	1	1	1	1	1	1
26246394	c0499	yaiE	1	1	1	1	1	1	1	1	1	1	1	1	1	1	1	1	1	1
26246395	c0500	-	1	1	1	1	1	1	1	1	1	1	1	1	1	1	1	1	1	1
26246396	c0501	ykiA	1	1	1	1	1	1	1	1	0	1	1	1	1	1	1	1	1	1
26246397	c0502	rdgC	1	1	1	1	1	1	1	1	1	1	1	1	1	1	1	1	1	1
26246398	c0503	-	1	1	1	1	1	1	1	1	1	1	1	1	1	1	1	1	1	1
26246399	c0504	araJ	1	1	1	1	1	1	1	1	1	1	1	1	1	1	1	1	1	1
26246400	c0505	sbcC	1	1	1	1	1	1	1	1	1	1	1	1	1	1	1	1	1	1
26246401	c0506	sbcD	1	1	1	1	1	1	1	1	1	1	1	1	1	1	1	1	1	1
26246402	c0507	-	1	1	1	1	1	1	1	1	1	1	1	1	1	1	1	1	1	1
26246403	c0508	phoB	1	1	1	1	1	1	1	1	1	1	1	1	1	1	1	1	1	1
26246404	c0509	phoR	1	1	1	1	1	1	1	1	1	1	1	1	1	1	1	1	1	1
26246405	c0510	-	1	1	1	1	1	1	1	1	1	1	1	1	1	1	1	1	1	1
26246406	c0511	brnQ	1	1	1	1	1	1	1	1	1	1	1	1	1	1	1	1	1	1
26246407	c0512	proY	1	1	1	1	1	1	1	1	1	1	1	1	1	1	1	1	1	1
26246408	c0513	malZ	1	1	1	1	1	1	1	1	1	1	1	1	1	1	1	1	1	1
26246409	c0514	yajB	1	1	1	1	1	1	1	1	1	1	1	1	1	1	1	1	1	1
26246410	c0515	queA	1	1	1	1	1	1	1	1	1	1	1	1	1	1	1	1	1	1
26246411	c0516	tgt	1	1	1	1	1	1	1	1	1	1	1	1	1	1	1	1	1	1
26246412	c0517	yajC	1	1	1	1	1	1	1	1	1	1	1	1	1	1	1	1	1	1
26246413	c0518	secD	1	1	1	1	1	1	1	1	1	1	1	1	1	1	1	1	1	1
26246414	c0519	secF	1	1	1	1	1	1	1	1	1	1	1	1	1	1	1	1	1	1
26246415	c0520	yajD	1	1	1	1	1	1	1	1	1	1	1	1	1	1	1	1	1	1
26246416	c0521	tsx	1	1	1	1	1	1	1	1	1	1	1	1	1	1	1	1	1	1
26246417	c0522	yajI	1	1	1	1	1	1	1	1	1	1	1	1	1	1	1	1	1	1
26246418	c0523	ybaD	1	1	1	1	1	1	1	1	1	1	1	1	1	1	1	1	1	1
26246419	c0524	ribD	1	1	1	1	1	1	1	1	1	1	1	1	1	1	1	1	1	1
26246420	c0525	ribH	1	1	1	1	1	1	1	1	1	1	1	1	1	1	1	1	1	1
26246421	c0526	-	1	1	1	1	1	1	1	1	1	1	1	1	1	1	1	1	1	1
26246422	c0527	nusB	1	1	1	1	1	1	1	1	1	1	1	1	1	1	1	1	1	1
26246423	c0528	thiL	1	1	1	1	1	1	1	1	1	1	1	1	1	1	1	1	1	1
26246424	c0529	pgpA	1	1	1	1	1	1	1	1	1	1	1	1	1	1	1	1	1	1
26246425	c0530	yajO	1	1	1	1	1	1	1	1	1	1	1	1	1	1	1	1	1	1
26246426	c0531	dxs	1	1	1	1	1	1	1	1	1	1	1	1	1	1	1	1	1	1
26246427	c0532	ispA	1	1	1	1	1	1	1	1	1	1	1	1	1	1	1	1	1	1
26246428	c0533	xseB	1	1	1	1	1	1	1	1	1	1	1	1	1	1	1	1	1	1
26246429	c0534	yajK	1	1	1	1	1	1	1	1	1	1	1	1	1	1	1	1	1	1
26246430	c0535	thiJ	1	1	1	1	1	1	1	1	1	1	1	1	1	1	1	1	1	1
26246431	c0536	apbA	1	1	1	1	1	1	1	1	1	1	1	1	1	1	1	1	1	1
26246432	c0537	yajQ	1	1	1	1	1	1	1	1	1	1	1	1	1	1	1	1	1	1
26246433	c0538	yajR	1	1	1	1	1	1	1	1	1	1	1	1	1	1	1	1	0	1
26246434	c0539	cyoE	1	1	1	1	1	1	1	1	1	1	1	1	1	1	1	1	1	0
26246435	c0540	cyoD	1	1	1	1	1	1	1	1	1	1	1	1	1	1	1	1	1	0
26246436	c0541	cyoC	1	1	1	1	1	1	1	1	1	1	1	1	1	1	1	1	1	0
26246437	c0542	cyoB	1	1	1	1	1	1	1	1	1	1	1	1	1	1	1	1	1	0
26246438	c0543	cyoA	1	1	1	1	1	1	1	1	1	1	1	1	1	1	1	1	1	0
26246439	c0544	ampG	0	1	1	1	1	1	1	0	0	0	0	1	1	1	1	1	1	1
26246440	c0545	-	0	1	1	1	1	1	1	0	0	0	0	1	1	1	1	1	1	1
26246441	c0546	yajG	0	1	1	1	1	1	1	0	0	0	0	1	1	1	1	1	1	1
26246442	c0547	-	0	1	1	1	1	1	1	0	0	0	0	1	1	1	1	1	1	1
26246443	c0548	bolA	0	1	1	1	1	1	1	0	0	0	0	1	1	1	1	1	1	1
26246444	c0549	-	0	1	1	1	1	1	1	0	0	0	0	1	1	1	1	1	1	1
26246445	c0550	-	0	1	1	1	1	1	1	0	0	0	0	1	1	1	1	1	1	1
26246446	c0551	tig	0	1	1	1	1	1	1	1	0	0	1	1	1	1	1	1	1	1
26246447	c0552	-	0	1	1	1	1	1	1	1	0	0	1	1	1	1	1	1	1	1
26246448	c0553	clpP	0	1	1	1	1	1	1	1	0	0	1	1	1	1	1	1	1	1
26246449	c0554	clpX	0	1	1	1	1	0	1	1	0	1	1	1	1	1	1	1	1	1
26246450	c0555	lon	1	1	1	1	1	1	1	1	1	1	1	1	1	1	1	1	1	1
26246451	c0556	hupB	1	1	1	1	1	1	1	1	1	1	1	1	1	1	1	1	1	1
26246452	c0557	ybaU	1	1	1	1	1	1	1	1	1	1	1	1	1	1	1	1	1	1
26246453	c0558	ybaV	1	1	1	1	1	1	1	1	1	1	1	1	1	1	1	1	1	1
26246454	c0559	ybaW	1	1	1	1	1	1	1	1	1	1	1	1	1	1	1	1	1	1
26246455	c0560	ybaX	1	1	1	1	1	1	1	1	1	1	1	1	1	1	1	1	1	1
26246456	c0561	ybaE	1	1	1	1	1	1	1	1	1	1	1	1	1	1	1	1	1	1
26246457	c0562	cof	1	1	1	1	1	1	1	1	1	1	1	1	1	1	1	1	1	1
26246458	c0563	-	0	0	0	0	0	0	0	0	0	0	0	0	0	0	0	0	0	0
26246459	c0564	ybaO	1	1	1	1	1	1	1	1	1	1	1	1	1	1	1	1	1	1
26246460	c0565	mdlA	1	1	1	1	1	1	1	1	1	1	1	1	1	1	1	1	1	1
26246461	c0566	mdlB	1	1	1	1	1	1	1	1	1	1	1	1	1	1	1	1	1	1
26246462	c0567	-	1	1	1	1	1	1	1	1	1	1	1	1	1	1	1	1	1	1
26246463	c0568	glnK	1	1	1	1	1	1	1	1	1	1	1	1	1	1	1	1	1	1
26246464	c0569	-	1	1	1	1	1	1	1	1	1	1	1	1	1	1	1	1	1	1
26246465	c0570	amtB	1	1	1	1	1	1	1	1	1	1	1	1	1	1	1	1	1	1
26246466	c0571	tesB	1	1	1	1	1	1	1	1	1	1	1	1	1	1	1	1	1	1
26246467	c0572	ybaY	1	1	1	1	1	1	1	1	1	1	1	1	1	1	1	1	1	1
26246468	c0573	ybaZ	1	1	1	1	1	1	1	1	1	1	1	1	1	1	1	1	1	1
26246469	c0574	ybaA	1	1	1	1	1	1	1	1	1	1	1	1	1	1	1	1	1	1
26246470	c0575	ylaB	1	1	1	1	1	1	1	1	1	1	1	1	1	1	1	1	1	1
26246471	c0576	ylaC	1	1	1	1	1	1	1	1	1	1	1	1	1	1	1	1	1	1
26246472	c0577	ylaD	1	1	1	1	1	1	1	1	1	1	1	1	1	1	1	1	1	1
26246473	c0578	hha	1	1	1	1	1	1	1	1	1	1	1	1	1	1	1	1	1	1
26246474	c0579	ybaJ	1	1	1	1	1	1	1	1	1	1	1	1	1	1	1	1	1	1
26246475	c0580	acrB	1	1	1	1	1	1	1	1	1	1	1	1	1	1	1	1	1	1
26246476	c0581	acrA	1	1	1	1	1	1	1	1	1	1	1	1	1	1	1	1	1	1
26246477	c0582	acrR	1	1	1	1	1	1	1	1	1	1	1	1	1	1	1	1	1	1
26246478	c0583	-	1	1	1	1	1	1	1	1	1	1	1	1	1	1	1	1	1	1
26246479	c0584	aefA	1	1	1	1	1	1	1	1	1	1	1	1	1	1	1	1	1	1
26246480	c0585	ybaM	1	1	1	1	1	1	1	1	1	1	1	1	1	1	1	1	1	1
26246481	c0586	priC	1	1	1	1	1	1	1	1	1	1	1	1	1	1	1	1	1	1
26246482	c0587	ybaN	1	1	1	1	1	1	1	1	1	1	1	1	1	1	1	1	1	1
26246483	c0588	apt	1	1	1	1	1	1	1	1	1	1	1	1	1	1	1	1	1	1
26246484	c0589	dnaX	1	1	1	1	1	1	1	1	1	1	1	1	1	1	1	1	1	1
26246485	c0590	-	1	1	1	1	1	1	1	1	1	1	1	1	1	1	1	1	1	1
26246486	c0591	ybaB	1	1	1	1	1	1	1	1	1	1	1	1	1	1	1	1	1	1
26246487	c0592	recR	1	1	1	1	1	1	1	1	1	1	1	1	1	1	1	1	1	1
26246488	c0593	htpG	1	1	1	1	1	1	1	1	1	1	1	1	1	1	1	1	1	1
26246489	c0594	adk	1	1	1	1	1	1	1	1	1	1	1	1	1	1	1	1	1	1
26246490	c0595	hemH	1	1	1	1	1	1	1	1	1	1	1	1	1	1	1	1	1	1
26246491	c0596	ybaC	1	1	1	1	1	1	1	1	1	1	1	1	1	1	1	1	1	1
26246492	c0597	gsk	1	1	1	1	1	1	1	1	1	1	1	1	1	1	1	1	1	1
26246493	c0598	ybaL	1	1	1	1	1	1	1	1	1	1	1	1	1	1	1	1	1	1
26246494	c0599	fsr	1	1	1	1	1	1	1	1	1	1	1	1	1	1	1	1	1	1
26246495	c0600	ushA	1	1	1	1	1	1	1	1	1	1	1	1	1	1	1	1	1	1
26246496	c0601	ybaK	1	1	1	1	1	1	1	1	1	1	1	1	1	1	1	1	1	1
26246497	c0602	ybaP	1	1	1	1	1	1	1	1	1	1	1	1	1	1	1	1	1	1
26246498	c0603	ybaQ	1	1	1	1	0	1	1	1	1	1	1	1	1	1	1	1	1	1
26246499	c0604	ybaR	1	1	1	1	1	1	1	1	1	1	1	1	1	1	1	1	1	1
26246500	c0605	ybaS	1	1	1	1	1	1	1	1	1	1	1	1	1	1	1	1	1	1
26246501	c0606	ybaT	1	1	1	1	1	1	1	1	1	1	1	1	1	1	1	1	1	1
26246502	c0607	ybbI	1	1	1	1	1	1	1	1	1	1	1	1	1	1	1	1	1	1
26246503	c0608	-	1	1	0	1	0	0	0	0	0	0	0	0	0	0	0	0	0	0
26246504	c0609	ybbJ	1	1	1	1	1	1	1	1	1	1	1	1	1	1	1	1	1	1
26246505	c0610	ybbK	1	1	1	1	1	1	1	1	1	1	1	1	1	1	1	1	1	1
26246506	c0611	ybbL	1	1	1	1	1	1	1	1	1	1	1	1	1	1	1	1	1	1
26246507	c0613	ybbN	1	1	1	1	1	1	1	1	1	1	1	1	1	1	1	1	1	1
26246508	c0614	ybbO	1	1	1	1	1	1	1	1	1	1	1	1	1	1	1	1	1	1
26246509	c0615	tesA	1	1	1	1	1	1	1	1	1	1	1	1	1	1	1	1	1	1
26246510	c0616	ybbA	1	1	1	1	1	1	1	1	1	1	1	1	1	1	1	1	1	1
26246511	c0617	ybbP	1	1	1	1	1	1	1	1	1	1	1	1	1	1	1	1	1	1
26246512	c0618	ybbB	1	1	1	1	1	1	1	1	1	1	1	1	1	1	1	1	1	1
26246513	c0619	ybbS	1	1	1	1	1	1	1	1	1	1	1	1	1	1	1	1	1	1
26246514	c0620	ybbT	1	1	1	1	1	1	1	1	1	1	1	0	1	1	1	1	1	1
26246515	c0621	ybbU	1	1	1	1	1	1	1	1	1	1	1	0	1	1	1	1	1	1
26246516	c0622	gcl	1	1	1	1	1	1	1	1	1	1	1	0	1	1	1	1	1	1
26246517	c0623	gip	1	1	1	1	1	1	1	1	1	1	1	1	1	1	1	1	1	0
26246518	c0624	ybbQ	1	1	1	1	1	1	1	1	1	1	1	0	1	1	1	1	0	0
26246519	c0625	ybbW	1	1	1	1	1	1	1	1	1	1	1	0	1	1	1	1	0	0
26246520	c0626	ybbX	1	1	1	1	1	1	1	1	1	1	1	1	1	1	1	1	0	0
26246521	c0627	ybbY	1	1	1	1	1	1	1	1	1	1	1	1	1	1	1	1	0	0
26246522	c0628	ybbZ	1	1	1	1	1	1	1	1	1	1	1	0	1	1	1	1	0	0
26246523	c0629	ylbA	1	1	1	1	1	1	1	1	1	1	1	0	1	1	1	1	1	0
26246524	c0630	ylbB	1	1	1	1	1	1	1	1	1	1	1	0	1	1	1	1	1	0
26246525	c0631	-	1	1	1	1	1	1	1	1	1	1	1	0	1	1	1	1	0	0
26246526	c0632	fdrA	1	1	1	1	1	1	1	1	1	1	1	0	1	1	1	1	0	1
26246527	c0633	ylbE	1	1	1	1	1	1	1	1	1	1	1	1	1	1	1	1	0	1
26246528	c0634	ylbF	1	1	1	1	1	1	1	1	1	1	1	1	1	1	1	1	1	1
26246529	c0635	arcC	1	1	1	1	1	1	1	1	1	1	1	1	1	1	1	1	1	1
26246530	c0636	purK	1	1	1	1	1	1	1	1	1	1	1	1	1	1	1	1	1	1
26246531	c0637	purE	1	1	1	1	1	1	1	1	1	1	1	1	1	1	1	1	1	1
26246532	c0638	-	1	1	1	0	0	0	0	0	0	0	0	0	0	0	0	0	0	0
26246533	c0639	ybbF	1	1	1	1	1	1	1	1	1	1	1	1	1	1	1	1	1	1
26246534	c0640	-	1	1	1	1	1	1	1	1	1	1	1	1	1	1	1	1	1	1
26246535	c0641	ppiB	1	1	1	1	1	1	1	1	1	1	1	1	1	1	1	1	1	1
26246536	c0642	cysS	1	1	1	1	1	1	1	1	1	1	1	1	1	1	1	1	1	1
26246537	c0643	ybcI	1	1	1	1	1	1	1	1	1	1	1	1	1	1	1	1	1	1
26246538	c0644	ybcJ	1	1	1	1	1	1	1	1	1	1	1	1	1	1	1	1	1	1
26246539	c0645	folD	1	1	1	1	1	1	1	1	1	1	1	1	1	1	1	1	1	1
26246540	c0646	-	1	1	1	1	1	1	1	1	1	1	1	1	1	1	1	1	1	1
26246541	c0649	ydfM	1	1	1	0	0	1	0	1	0	0	1	0	0	0	0	0	0	0
26246542	c0650	-	1	1	1	1	0	0	0	1	0	0	1	0	0	1	0	0	0	0
26246543	c0651	-	1	1	1	1	0	1	0	1	0	0	1	0	0	1	0	0	0	0
26246544	c0652	ompT	1	1	1	1	0	1	0	1	0	1	1	0	0	1	0	0	0	0
26246545	c0653	ybcH	1	1	1	1	1	1	1	1	1	1	1	1	0	1	1	1	1	1
26246546	c0654	nfrA	1	1	1	1	1	1	1	1	1	1	1	1	0	1	1	1	1	1
26246547	c0655	nfrB	1	1	1	1	1	1	1	1	1	1	1	1	0	1	1	1	1	1
26246548	c0656	cusS	1	1	1	1	1	1	1	1	0	1	1	1	1	1	1	1	1	0
26246549	c0657	cusR	1	1	1	1	1	1	1	1	0	1	1	1	1	1	1	1	1	0
26246550	c0658	cusC	1	1	1	1	1	1	1	1	0	1	1	1	1	1	1	1	1	0
26246551	c0659	cusX	1	1	1	1	1	1	1	1	1	1	1	1	1	1	1	1	1	0
26246552	c0660	cusB	1	1	1	1	1	1	1	1	1	1	1	1	1	1	1	1	1	0
26246553	c0661	cusA	1	1	1	1	1	1	1	1	1	1	1	1	1	1	1	1	1	1
26246554	c0662	pheP	1	1	1	1	1	1	1	1	1	1	1	1	1	1	1	1	1	1
26246555	c0663	ybdG	1	1	1	1	1	1	1	1	1	1	1	1	1	1	1	1	1	1
26246556	c0664	nfnB	1	1	1	1	1	1	1	1	1	1	1	1	1	1	1	1	1	1
26246557	c0665	ybdF	1	1	1	1	1	1	1	1	1	1	1	1	1	1	1	1	1	1
26246558	c0666	ybdJ	1	1	1	1	1	1	1	1	1	1	1	1	1	1	1	1	1	1
26246559	c0667	ybdK	1	1	1	1	1	1	1	1	1	1	1	1	1	1	1	1	1	1
26246560	c0668	entD	1	1	1	1	1	1	1	1	1	1	1	1	1	1	1	1	1	1
26246561	c0669	fepA	1	1	1	1	1	1	1	1	1	1	1	1	1	1	1	1	1	1
26246562	c0670	-	1	1	1	1	1	1	1	1	1	1	1	1	1	1	1	1	1	1
26246563	c0671	fes	1	1	1	1	1	1	1	1	1	1	1	1	1	1	1	1	1	1
26246564	c0672	-	0	1	1	1	1	1	1	1	1	1	1	1	1	1	1	1	1	1
26246565	c0673	entF	1	1	1	1	1	1	1	1	1	1	1	1	1	1	1	1	1	1
26246566	c0674	fepE	1	1	1	1	1	1	1	1	1	1	1	1	1	1	1	1	1	1
26246567	c0675	fepC	1	1	1	1	1	1	1	1	1	1	1	1	1	1	1	1	1	1
26246568	c0676	fepG	1	1	1	1	1	1	1	1	1	1	1	1	1	1	1	1	1	1
26246569	c0677	fepD	1	1	1	1	1	1	1	1	1	1	1	1	1	1	1	1	1	1
26246570	c0678	ybdA	1	1	1	1	1	1	1	1	1	1	1	1	1	1	1	1	1	1
26246571	c0679	fepB	1	1	1	1	1	1	1	1	1	1	1	1	1	1	1	1	1	1
26246572	c0680	entC	1	1	1	1	1	1	1	1	1	1	1	1	1	1	1	1	1	1
26246573	c0681	entE	1	1	1	1	1	1	1	1	1	1	1	1	1	1	1	1	1	1
26246574	c0682	entB	1	1	1	1	1	1	1	1	1	1	1	1	1	1	1	1	1	1
26246575	c0683	entA	1	1	1	1	1	1	1	1	1	1	1	1	1	1	1	1	1	1
26246576	c0684	ybdB	1	1	1	1	1	1	1	1	1	1	1	1	1	1	1	1	1	1
26246577	c0685	cstA	1	1	1	1	1	1	1	1	1	1	1	1	1	1	1	1	1	1
26246578	c0686	-	1	1	1	1	1	1	1	1	1	1	1	1	1	1	1	1	1	1
26246579	c0687	ybdH	1	1	1	1	1	1	1	1	1	1	1	1	1	1	1	1	1	1
26246580	c0688	ybdL	1	1	1	1	1	0	1	1	1	1	1	1	1	1	1	1	1	1
26246581	c0689	-	1	1	1	1	1	0	1	1	1	1	1	1	1	1	1	1	1	1
26246582	c0690	-	1	1	1	1	1	1	1	1	1	1	1	1	1	1	1	1	1	1
26246583	c0691	ybdO	1	1	1	1	1	1	1	1	1	1	1	1	1	1	1	1	1	1
26246584	c0692	dsbG	1	1	1	1	1	1	1	1	1	1	1	1	1	1	1	1	1	1
26246585	c0693	-	1	1	1	1	1	1	1	1	1	1	1	1	1	1	1	1	1	1
26246586	c0694	ahpC	1	1	1	1	1	1	1	1	1	1	1	1	1	1	1	1	1	1
26246587	c0695	ahpF	1	1	1	1	1	1	1	1	1	1	1	1	1	1	1	1	1	1
26246588	c0696	ybdQ	1	1	1	1	1	1	1	1	1	1	1	1	1	1	1	1	1	1
26246589	c0697	-	1	1	1	1	1	1	1	1	1	1	1	1	1	1	1	1	1	0
26246590	c0698	rnk	1	1	1	1	1	1	1	1	1	1	1	1	1	1	1	1	1	0
26246591	c0699	rna	1	1	1	1	1	1	1	1	1	1	1	1	1	1	1	1	1	0
26246592	c0700	ybdS	1	1	1	1	1	1	1	1	1	1	1	1	1	1	1	1	1	0
26246593	c0701	citG	1	1	1	1	1	1	1	1	1	1	1	1	1	1	1	1	1	0
26246594	c0702	citX	1	1	1	1	1	1	1	1	1	1	1	1	1	1	1	1	1	0
26246595	c0703	-	1	1	1	1	1	1	1	1	1	1	1	1	1	1	1	1	1	0
26246596	c0704	citF	1	1	1	1	1	1	1	1	1	1	1	1	1	1	1	1	1	0
26246597	c0705	-	1	1	1	1	1	1	1	1	1	1	1	1	1	1	1	1	1	0
26246598	c0706	citE	1	1	1	1	1	1	1	1	1	1	1	1	1	1	1	1	1	0
26246599	c0709	citC	1	1	1	1	1	1	1	1	1	1	1	1	1	1	1	1	1	0
26246600	c0710	citA	1	1	1	1	1	1	1	1	1	1	1	1	1	1	1	1	0	0
26246601	c0711	citB	1	1	1	1	1	1	1	1	1	1	1	1	1	1	1	1	1	0
26246602	c0712	dcuC	1	1	1	1	1	1	1	1	1	1	1	1	1	1	1	1	1	0
26246603	c0713	crcA	1	1	1	1	1	1	1	1	1	1	1	1	1	1	1	1	1	1
26246604	c0714	cspE	1	1	1	1	1	1	1	1	1	1	1	1	1	1	1	1	1	1
26246605	c0715	ccrB	1	1	1	1	1	1	1	1	1	1	1	1	1	1	1	1	1	1
26246606	c0716	ybeM	1	1	1	1	1	1	1	1	1	1	1	1	1	1	1	1	1	1
26246607	c0717	tatE	1	1	1	1	1	1	1	1	1	1	1	1	1	1	1	1	1	1
26246608	c0718	lipA	1	1	1	1	1	1	1	1	1	1	1	1	1	1	1	1	1	1
26246609	c0719	-	1	1	1	1	1	1	1	1	1	1	1	1	1	1	1	1	1	1
26246610	c0720	lipB	1	1	1	1	1	1	1	1	1	1	1	1	1	1	1	1	1	1
26246611	c0721	ybeD	1	1	1	1	1	1	1	1	1	1	1	1	1	1	1	1	1	1
26246612	c0722	dacA	1	1	1	1	1	0	1	1	1	1	1	1	1	1	1	1	1	1
26246613	c0723	-	1	1	1	1	1	1	1	1	1	1	1	1	1	1	1	1	1	1
26246614	c0724	rlpA	1	1	1	1	1	1	1	1	1	1	1	1	1	1	1	1	1	1
26246615	c0725	mrdB	1	1	1	1	1	1	1	1	1	1	1	1	1	1	1	1	1	1
26246616	c0726	mrdA	1	1	1	1	1	1	1	1	1	1	1	1	1	1	1	1	1	1
26246617	c0727	ybeA	1	1	1	1	1	1	1	1	1	1	1	1	1	1	1	1	1	1
26246618	c0728	ybeB	1	1	1	1	1	1	1	1	1	1	1	1	1	1	1	1	1	1
26246619	c0729	phpB	1	1	1	1	1	1	1	1	1	1	1	1	1	1	1	1	1	1
26246620	c0730	nadD	1	1	1	1	1	1	1	1	1	1	1	1	1	1	1	1	1	1
26246621	c0731	holA	1	1	1	1	1	1	1	1	1	1	1	1	1	1	1	1	1	1
26246622	c0732	rlpB	1	1	1	1	1	1	1	1	1	1	1	1	1	1	1	1	1	1
26246623	c0733	leuS	1	1	1	1	1	1	1	1	1	1	1	1	1	1	1	1	1	1
26246624	c0734	ybeL	1	1	1	1	1	1	1	1	1	1	1	1	1	1	1	1	1	1
26246625	c0735	ybeK	1	1	1	1	1	1	1	1	1	1	1	1	1	1	1	1	1	0
26246626	c0736	gltL	1	1	1	1	1	1	1	1	1	1	1	1	1	1	1	1	1	0
26246627	c0737	gltK	1	1	1	1	1	1	1	1	1	1	1	1	1	1	1	1	1	1
26246628	c0738	gltJ	1	1	1	1	1	1	1	1	1	1	1	1	1	1	1	1	1	1
26246629	c0739	ybeJ	1	1	1	1	1	1	1	1	1	1	1	1	1	1	1	1	1	1
26246630	c0740	-	1	1	1	1	1	1	1	1	1	1	1	1	1	1	1	1	1	1
26246631	c0741	-	1	1	1	1	1	1	1	1	1	1	1	1	1	0	0	0	0	0
26246632	c0742	lnt	1	1	1	1	1	1	1	1	1	1	1	1	1	1	1	1	1	1
26246633	c0743	ybeX	1	1	1	1	1	1	1	1	1	1	1	1	1	1	1	1	1	1
26246634	c0744	ybeY	1	1	1	1	1	1	1	1	1	1	1	1	1	1	1	1	1	1
26246635	c0745	ybeZ	1	1	1	1	1	1	1	1	1	1	1	1	1	1	1	1	1	1
26246636	c0746	-	1	1	1	1	1	1	1	1	1	1	1	1	1	1	1	1	1	1
26246637	c0747	yleA	1	1	1	1	1	1	1	1	1	1	1	1	1	1	1	1	1	1
26246638	c0748	yleB	1	1	1	1	1	1	1	1	1	1	1	1	1	1	1	1	1	1
26246639	c0749	asnB	1	1	1	1	1	1	1	1	1	0	1	1	1	1	1	1	1	1
26246640	c0750	nagD	1	1	1	1	1	1	1	1	1	1	1	1	1	1	1	1	1	1
26246641	c0751	nagC	1	1	1	1	1	1	1	1	1	1	1	1	1	1	1	1	1	1
26246642	c0752	nagA	1	1	1	1	1	1	1	1	1	1	1	1	1	1	1	1	1	1
26246643	c0753	nagB	1	1	1	1	1	1	1	1	1	1	1	1	1	1	1	1	1	1
26246644	c0754	-	1	1	1	1	1	1	1	1	1	1	1	1	1	1	1	1	1	1
26246645	c0755	nagE	1	1	1	1	1	1	1	1	1	1	1	1	1	1	1	1	1	1
26246646	c0756	-	1	1	1	1	1	1	1	1	1	1	1	1	1	1	1	1	1	1
26246647	c0757	-	1	1	1	1	0	0	0	0	0	0	0	0	0	0	0	0	0	0
26246648	c0758	-	1	1	1	1	0	0	0	0	0	0	0	0	0	0	0	0	0	0
26246649	c0759	-	1	1	1	1	0	0	0	0	0	0	0	0	0	0	0	0	0	0
26246650	c0760	-	1	1	0	1	0	0	0	0	0	0	0	0	0	0	0	0	0	0
26246651	c0761	-	1	1	1	1	0	0	0	0	0	0	0	0	0	0	0	0	0	0
26246652	c0762	-	1	1	1	1	0	0	0	0	0	0	0	0	0	0	0	0	0	0
26246653	c0763	-	1	1	1	1	0	0	0	0	0	0	0	0	0	0	0	0	0	0
26246654	c0764	-	1	1	1	1	0	0	0	0	0	0	0	0	0	0	0	0	0	0
26246655	c0765	-	1	1	1	1	0	0	0	0	0	0	0	0	0	0	0	0	0	0
26246656	c0766	glnS	1	1	1	1	1	1	1	1	1	1	1	1	1	1	1	1	1	1
26246657	c0767	-	0	0	0	0	0	0	0	0	0	0	0	0	0	0	0	0	0	0
26246658	c0768	ybfM	1	1	1	1	1	1	1	1	1	1	1	1	1	1	1	1	1	1
26246659	c0769	ybfN	1	1	1	1	1	1	1	1	1	1	1	1	1	1	1	1	1	1
26246660	c0770	fur	1	1	1	1	1	1	1	1	1	1	1	1	1	1	1	1	1	1
26246661	c0771	fldA	1	1	1	1	1	1	1	0	1	1	0	1	1	1	1	1	1	1
26246662	c0772	ybfE	0	1	1	1	1	0	1	0	0	0	0	1	1	1	1	1	1	1
26246663	c0773	ybfF	0	1	1	1	1	0	1	0	0	0	0	1	1	1	1	1	1	1
26246664	c0774	seqA	1	1	1	1	1	1	1	1	1	1	1	1	1	1	1	1	1	1
26246665	c0775	pgm	1	1	1	1	1	1	1	1	1	1	1	1	1	1	1	1	1	1
26246666	c0776	potE	1	1	1	1	0	1	1	1	1	1	1	1	0	1	1	1	1	0
26246667	c0777	speF	1	1	1	1	0	1	1	1	1	1	1	1	0	1	1	1	1	0
26246668	c0778	-	1	1	1	1	0	1	1	1	1	1	1	1	0	1	1	1	1	0
26246669	c0779	kdpE	1	1	1	1	1	1	1	1	1	1	1	1	1	1	1	1	1	1
26246670	c0780	kdpD	1	1	1	1	1	1	1	1	1	1	1	1	1	1	1	1	1	1
26246671	c0781	kdpC	1	1	1	1	1	1	1	1	1	1	1	1	1	1	1	1	1	1
26246672	c0782	kdpB	1	1	1	1	1	1	1	1	1	1	1	1	1	1	1	1	1	1
26246673	c0783	kdpA	1	1	1	1	1	1	1	1	1	1	1	1	1	1	1	1	1	1
26246674	c0784	-	1	1	1	1	1	1	1	1	1	1	1	1	1	1	1	1	1	1
26246675	c0785	ybfA	1	1	1	1	1	1	1	1	1	1	1	1	1	1	1	1	1	1
26246676	c0786	ybgA	1	1	1	1	1	1	1	1	1	1	1	1	1	1	1	1	1	1
26246677	c0787	phrB	1	1	1	1	1	1	1	1	1	1	1	1	1	1	1	1	1	1
26246678	c0788	ybgH	1	1	1	1	1	1	1	1	1	1	1	1	1	1	1	1	1	1
26246679	c0789	ybgI	1	1	1	1	1	1	1	1	1	1	1	1	1	1	1	1	1	1
26246680	c0790	ybgJ	1	1	1	1	1	1	1	1	1	1	1	1	1	1	1	1	1	1
26246681	c0791	ybgK	1	1	1	1	1	1	1	1	1	1	1	1	1	1	1	1	1	1
26246682	c0792	ybgL	1	1	1	1	1	1	1	1	1	1	1	1	1	1	1	1	1	1
26246683	c0793	nei	1	1	1	1	1	1	1	1	1	1	1	1	1	1	1	1	1	1
26246684	c0794	abrB	1	1	1	1	1	1	1	1	1	1	1	1	1	1	1	1	1	1
26246685	c0795	-	1	1	1	1	1	1	1	1	1	1	1	1	1	1	1	1	1	1
26246686	c0796	gltA	1	1	1	1	1	1	1	1	1	1	1	1	1	1	1	1	1	1
26246687	c0797	-	1	1	1	1	1	1	1	1	1	1	1	1	1	1	1	1	1	1
26246688	c0798	sdhC	1	1	1	1	1	1	1	1	1	1	1	1	1	1	1	1	1	1
26246689	c0799	-	1	1	1	1	1	1	1	1	1	1	1	1	1	1	1	1	1	1
26246690	c0800	sdhD	1	1	1	1	1	1	1	1	1	1	1	1	1	1	1	1	1	1
26246691	c0801	sdhA	1	1	1	1	1	1	1	1	1	1	1	1	1	1	1	1	1	1
26246692	c0802	sdhB	1	1	1	1	1	1	1	1	1	1	1	1	1	1	1	1	1	1
26246693	c0803	sucA	1	1	1	1	1	1	1	1	1	1	1	1	1	1	1	1	1	1
26246694	c0804	sucB	1	1	1	1	1	1	1	1	1	1	1	1	1	1	1	1	1	1
26246695	c0805	sucC	1	1	1	1	1	1	1	1	1	1	1	1	1	1	1	1	1	1
26246696	c0806	sucD	1	1	1	1	1	1	1	1	1	1	1	1	1	1	1	1	1	1
26246697	c0807	-	1	1	1	0	0	0	0	0	0	0	0	0	0	0	0	0	0	0
26246698	c0808	-	1	1	1	0	0	0	0	0	0	0	0	0	0	0	0	0	0	0
26246699	c0809	-	1	1	1	0	0	0	0	0	0	0	0	0	0	0	0	0	0	0
26246700	c0810	-	1	1	1	0	0	0	0	0	0	0	0	0	0	0	0	0	0	0
26246701	c0811	cydA	1	1	1	1	1	1	1	1	1	1	1	1	1	1	1	1	1	1
26246702	c0812	cydB	1	1	1	1	1	1	1	1	1	0	1	1	1	1	1	1	1	1
26246703	c0813	-	1	1	1	1	1	1	1	1	1	0	1	1	1	1	1	1	1	1
26246704	c0814	ybgE	1	1	1	1	1	1	1	1	1	0	1	1	1	1	1	1	1	1
26246705	c0815	ybgC	1	1	1	1	1	1	1	1	1	0	1	1	1	1	1	1	1	1
26246706	c0816	tolQ	1	1	1	1	1	1	1	1	1	0	1	1	1	1	1	1	1	1
26246707	c0817	tolR	1	1	1	1	1	1	1	0	0	0	0	1	1	1	1	1	1	1
26246708	c0818	tolA	1	1	1	1	1	1	1	0	0	0	0	1	1	1	1	1	1	1
26246709	c0819	tolB	0	1	1	1	1	1	1	0	0	0	0	1	1	1	1	1	1	1
26246710	c0820	-	0	1	1	1	1	1	1	0	0	0	0	1	1	1	1	1	1	1
26246711	c0821	pal	0	1	1	1	1	1	1	0	0	0	0	1	1	1	1	1	1	1
26246712	c0822	ybgF	0	1	1	1	1	1	1	0	0	0	0	1	1	1	1	1	1	1
26246713	c0823	-	0	1	1	1	1	1	1	0	0	0	0	1	1	1	1	1	1	1
26246714	c0824	-	0	1	1	1	1	1	1	0	0	0	0	1	1	1	1	1	1	1
26246715	c0825	nadA	1	1	1	1	1	1	1	1	1	1	1	1	1	1	1	1	1	1
26246716	c0826	pnuC	1	1	1	1	1	1	1	1	1	1	1	1	1	1	1	1	1	1
26246717	c0827	-	1	1	1	1	1	1	1	1	1	1	1	1	1	1	1	1	1	1
26246718	c0828	-	1	1	1	1	1	1	1	1	1	1	1	1	1	1	1	1	1	1
26246719	c0829	ybgS	1	1	1	1	1	1	1	1	1	1	1	1	1	1	1	1	1	1
26246720	c0830	aroG	1	1	1	1	1	1	1	1	1	1	1	1	1	1	1	1	1	1
26246721	c0831	gpmA	1	1	1	1	1	1	1	1	1	1	1	1	1	1	1	1	1	1
26246722	c0832	galM	1	1	1	1	1	1	1	1	1	1	1	1	1	1	1	1	1	1
26246723	c0833	galK	1	1	1	1	1	1	1	1	1	1	1	1	1	1	1	1	1	1
26246724	c0834	galT	1	1	1	1	1	1	1	1	1	1	1	1	1	1	1	1	1	1
26246725	c0835	galE	1	1	1	1	1	1	1	1	1	1	1	1	1	1	1	1	1	1
26246726	c0836	modF	1	1	1	1	1	1	1	1	1	1	1	1	1	1	1	1	1	1
26246727	c0837	modE	1	1	1	1	1	1	1	1	1	1	1	1	1	1	1	1	1	1
26246728	c0838	ybhT	1	1	1	1	1	1	1	1	1	1	1	1	1	1	1	1	1	1
26246729	c0839	-	1	1	1	1	1	1	1	1	1	1	1	1	1	1	1	1	1	1
26246730	c0840	modA	1	1	1	1	1	1	1	1	1	1	1	1	1	1	1	1	1	1
26246731	c0841	modB	1	1	1	1	1	1	1	1	1	1	1	1	1	1	1	1	1	1
26246732	c0842	modC	1	1	1	1	1	1	1	1	1	1	1	1	1	1	1	1	1	1
26246733	c0843	ybhA	1	1	1	1	1	1	1	1	1	1	1	0	1	1	1	1	1	1
26246734	c0844	ybhE	1	1	1	1	1	1	1	1	1	1	1	1	1	1	1	1	1	0
26246735	c0845	ybhD	1	1	1	1	1	1	1	1	1	1	1	1	1	1	1	1	1	0
26246736	c0846	ybhH	1	1	1	1	1	1	1	1	1	1	1	0	1	1	1	1	1	0
26246737	c0847	ybhI	1	1	1	1	1	1	1	1	1	1	1	0	1	1	1	1	1	0
26246738	c0848	ybhJ	1	1	1	1	1	1	1	1	1	1	1	1	1	1	1	1	1	0
26246739	c0849	ybhC	1	1	1	1	1	1	1	1	1	1	1	1	1	1	1	1	1	0
26246740	c0850	ybhB	1	1	1	1	1	1	1	1	1	1	1	1	1	1	1	1	1	1
26246741	c0851	gipA	1	1	0	1	0	0	0	0	0	0	0	0	0	0	0	0	0	0
26246742	c0852	-	1	1	0	1	0	0	0	0	0	0	0	0	0	0	0	0	0	0
26246743	c0853	bioA	1	1	1	1	1	1	1	1	1	1	1	1	1	1	1	1	1	1
26246744	c0854	-	1	1	1	1	1	1	1	1	1	1	1	1	1	1	0	1	1	1
26246745	c0855	bioB	1	1	1	1	1	1	1	1	1	1	1	1	1	1	1	1	1	1
26246746	c0856	bioF	1	1	1	1	1	1	1	1	1	1	1	1	1	1	1	1	1	1
26246747	c0857	bioC	1	1	1	1	1	1	1	1	1	1	1	1	1	1	1	1	1	1
26246748	c0858	bioD	1	1	1	1	1	1	1	1	1	1	1	1	1	1	1	1	1	1
26246749	c0859	-	1	1	1	1	1	1	1	1	1	1	1	1	1	1	1	1	1	1
26246750	c0860	uvrB	1	1	1	1	1	1	1	1	1	1	1	1	1	1	1	1	1	1
26246751	c0861	ybhK	1	1	1	1	1	1	1	1	1	1	1	1	1	1	1	1	1	1
26246752	c0862	moaA	1	1	1	1	1	1	1	1	1	1	1	1	1	1	1	1	1	1
26246753	c0863	moaB	1	1	1	1	1	1	1	1	1	1	1	1	1	1	1	1	1	1
26246754	c0864	-	1	1	1	1	1	1	1	1	1	1	1	1	1	1	1	1	1	1
26246755	c0865	moaC	1	1	1	1	1	1	1	1	1	1	1	1	1	1	1	1	1	1
26246756	c0866	moaD	1	1	1	1	1	1	1	1	1	1	1	1	1	1	1	1	1	1
26246757	c0867	moaE	1	1	1	1	1	1	1	1	1	1	1	1	1	1	1	1	1	1
26246758	c0868	ybhL	1	1	1	1	1	1	1	1	1	1	1	1	1	1	1	1	1	1
26246759	c0869	-	1	1	1	1	1	1	1	1	1	1	1	1	1	1	1	1	1	1
26246760	c0870	ybhM	1	1	1	1	1	1	1	1	1	1	1	1	1	1	1	1	1	1
26246761	c0871	ybhN	1	1	1	1	1	1	1	1	1	1	1	1	1	1	1	1	1	1
26246762	c0872	ybhO	1	1	1	1	1	1	1	1	1	1	1	1	1	1	1	1	1	1
26246763	c0873	ybhP	1	1	1	1	1	1	1	1	1	1	1	1	1	1	1	1	1	1
26246764	c0874	ybhQ	1	1	1	1	1	1	1	1	1	1	1	1	1	1	1	1	1	1
26246765	c0875	ybhR	1	1	1	1	1	1	1	1	1	1	1	1	1	1	1	1	1	1
26246766	c0876	ybhS	1	1	1	1	1	1	1	1	1	1	1	1	1	1	1	1	1	1
26246767	c0877	ybhF	1	1	1	1	1	1	1	1	1	1	1	1	1	1	1	1	1	1
26246768	c0878	ybhG	1	1	1	1	1	1	1	1	1	1	1	1	1	1	1	1	1	1
26246769	c0879	ybiH	1	1	1	1	1	1	1	1	1	1	1	1	1	1	1	1	1	1
26246770	c0880	rhlE	1	1	1	1	1	1	1	1	1	1	1	1	1	1	1	1	1	1
26246771	c0881	-	1	1	1	1	1	1	1	1	1	1	1	1	1	1	0	0	1	0
26246772	c0882	-	1	1	1	1	1	1	1	1	1	1	1	1	1	1	1	1	1	1
26246773	c0883	dinG	1	1	1	1	1	1	1	1	1	1	1	1	1	1	1	1	1	1
26246774	c0884	ybiB	1	1	1	1	1	1	1	1	1	1	1	1	1	1	1	1	1	1
26246775	c0885	ybiC	1	1	1	1	1	1	1	1	1	1	1	1	1	1	1	1	1	1
26246776	c0886	ybiJ	1	1	1	1	1	1	1	1	1	1	1	1	1	1	1	1	1	1
26246777	c0887	-	1	1	1	1	1	1	1	1	1	1	1	1	1	1	1	1	1	1
26246778	c0888	-	1	1	1	1	1	1	1	1	1	1	1	1	1	1	1	1	1	1
26246779	c0889	ybiX	1	1	1	1	1	1	1	1	1	1	1	1	1	1	1	1	1	1
26246780	c0890	ybiL	1	1	1	1	1	1	1	1	1	1	1	1	1	1	1	1	1	1
26246781	c0891	ybiM	1	1	1	1	1	1	1	1	1	1	1	1	1	1	1	1	1	1
26246782	c0892	ybiN	1	1	1	1	1	1	1	1	1	1	1	1	1	1	1	1	1	1
26246783	c0893	ybiO	1	1	1	1	1	1	1	1	1	1	1	1	1	1	1	1	1	1
26246784	c0894	glnQ	1	1	1	1	1	1	1	1	1	1	1	1	1	1	1	1	1	1
26246785	c0895	glnP	1	1	1	1	1	1	1	1	1	1	1	1	1	1	1	1	1	1
26246786	c0896	glnH	1	1	1	1	1	1	1	1	1	1	1	1	1	1	1	1	1	1
26246787	c0897	-	1	1	1	1	1	1	1	1	1	1	1	1	1	1	1	1	1	1
26246788	c0898	dps	1	1	1	1	1	1	1	1	1	1	1	1	1	1	1	1	1	1
26246789	c0899	ybiF	1	1	1	1	1	1	1	1	1	1	1	1	1	1	1	1	1	1
26246790	c0900	ompX	1	1	1	1	1	1	1	1	1	1	1	1	1	1	1	1	1	1
26246791	c0901	ybiP	1	1	1	1	1	1	1	1	1	1	1	1	1	1	1	1	1	1
26246792	c0902	-	1	1	1	1	1	1	1	1	1	1	1	1	1	1	1	1	1	1
26246793	c0903	-	1	1	1	1	1	1	1	1	1	1	1	1	1	1	1	1	1	1
26246794	c0904	ybiR	1	1	1	1	1	1	1	1	1	1	1	1	1	1	1	1	1	1
26246795	c0905	ybiS	1	1	1	1	1	1	1	1	1	1	1	1	1	1	1	1	1	1
26246796	c0906	ybiT	1	1	1	1	1	1	1	1	1	1	1	1	1	1	1	1	1	1
26246797	c0907	ybiV	1	1	1	1	1	1	1	1	1	1	1	1	1	1	1	1	1	1
26246798	c0908	ybiW	1	1	1	1	1	1	1	1	1	1	1	1	1	1	1	1	1	1
26246799	c0909	-	1	1	1	1	1	1	1	1	1	1	1	1	1	1	1	1	1	1
26246800	c0910	mipB	1	1	1	1	1	1	1	1	1	1	1	1	1	1	1	1	1	1
26246801	c0911	moeB	1	1	1	1	1	1	1	1	1	1	1	1	1	1	1	1	1	1
26246802	c0912	moeA	1	1	1	1	1	1	1	1	1	1	1	1	1	1	1	1	1	1
26246803	c0913	ybiK	1	1	1	1	1	1	1	1	1	1	1	1	1	1	1	1	1	1
26246804	c0914	yliA	1	1	1	1	1	1	1	1	1	1	1	1	1	1	1	1	1	1
26246805	c0915	-	1	1	1	1	1	1	1	1	1	1	1	1	1	1	1	1	1	1
26246806	c0916	yliC	1	1	1	1	1	1	1	1	1	1	1	1	1	1	1	1	1	1
26246807	c0917	yliD	1	1	1	1	1	1	1	1	1	1	1	1	1	1	1	1	1	1
26246808	c0918	yliE	1	1	1	1	1	1	1	1	1	1	1	1	1	1	1	1	1	0
26246809	c0919	yliF	1	1	1	1	1	1	1	1	1	1	1	1	1	1	1	1	1	0
26246810	c0920	yliG	1	1	1	1	1	1	1	1	1	1	1	1	1	1	1	1	1	0
26246811	c0921	yliH	1	1	1	1	1	1	1	1	1	1	1	1	1	1	1	1	1	0
26246812	c0922	yliI	1	1	1	1	1	1	1	1	1	1	1	1	1	1	1	1	1	1
26246813	c0923	yliJ	1	1	1	1	1	1	1	1	1	1	1	1	1	1	1	1	1	1
26246814	c0924	dacC	1	1	1	1	1	1	1	1	1	1	1	1	1	1	1	1	1	1
26246815	c0925	deoR	1	1	1	1	1	1	1	1	1	1	1	1	1	1	1	1	1	1
26246816	c0926	ybjG	1	1	1	1	1	1	1	1	1	1	1	1	1	1	1	1	1	1
26246817	c0927	cmr	1	1	1	1	1	1	1	1	1	1	1	1	1	1	1	1	1	1
26246818	c0928	ybjH	1	1	1	1	1	1	1	1	1	1	1	1	1	1	1	1	1	1
26246819	c0929	-	1	1	1	1	1	1	1	1	1	1	1	1	1	1	1	1	1	0
26246820	c0930	ybjJ	1	1	1	1	1	1	1	1	1	1	1	1	1	1	1	1	1	1
26246821	c0931	ybjK	1	1	1	1	1	1	1	1	1	1	1	1	1	1	1	1	1	1
26246822	c0932	intT	0	0	0	1	0	0	0	0	0	0	1	1	1	0	0	0	0	0
26246823	c0933	-	0	0	0	0	0	0	0	0	0	0	0	0	0	0	0	0	0	0
26246824	c0934	-	0	0	0	1	0	0	0	0	0	0	0	0	1	0	0	0	0	0
26246825	c0935	coxT	0	0	0	1	0	0	0	0	0	0	0	0	1	0	0	0	0	0
26246826	c0936	-	0	0	0	1	0	0	0	0	0	0	0	0	1	0	0	0	0	0
26246827	c0937	-	0	0	0	1	0	0	0	0	0	0	0	0	1	0	0	0	0	0
26246828	c0938	-	0	0	0	1	0	0	0	0	0	0	0	0	1	0	0	0	0	0
26246829	c0939	-	0	0	0	1	0	0	0	0	0	0	0	1	1	0	0	0	0	0
26246830	c0940	-	0	0	0	1	0	0	0	0	0	0	0	1	1	0	0	0	0	0
26246831	c0941	-	0	0	0	1	0	0	0	0	0	0	0	0	1	0	0	0	0	0
26246832	c0942	-	0	0	0	1	0	0	0	0	0	0	1	0	1	0	0	0	0	0
26246833	c0943	-	0	0	0	1	0	0	0	0	0	0	0	0	1	0	0	0	0	0
26246834	c0944	-	0	0	0	0	0	0	0	0	0	0	0	0	0	0	0	0	0	0
26246835	c0945	-	0	0	0	0	0	0	0	0	0	0	0	0	0	0	0	0	0	0
26246836	c0946	-	0	0	0	0	0	0	0	0	0	0	0	0	0	0	0	0	0	0
26246837	c0947	-	0	0	0	1	0	0	0	0	0	0	1	1	1	0	0	0	0	0
26246838	c0948	-	0	0	0	1	0	0	0	0	0	0	1	1	1	0	0	0	0	0
26246839	c0949	-	0	0	0	1	0	0	0	0	0	0	0	0	1	0	0	0	0	0
26246840	c0950	-	0	0	0	1	0	0	0	0	0	0	1	1	1	0	0	0	0	0
26246841	c0951	-	0	0	0	1	0	0	0	0	0	0	1	0	1	0	0	0	0	0
26246842	c0952	-	0	0	0	1	0	0	0	0	0	0	1	0	1	0	0	0	0	0
26246843	c0953	-	0	0	0	1	0	0	0	0	0	0	1	1	1	0	0	0	0	0
26246844	c0954	-	0	0	0	1	0	0	0	0	0	0	1	1	1	0	0	0	0	0
26246845	c0955	-	0	0	0	1	0	0	0	0	0	0	1	1	1	0	0	0	0	0
26246846	c0956	-	0	0	0	1	0	0	0	0	0	0	0	0	1	0	0	0	0	0
26246847	c0957	-	0	0	0	1	0	0	0	0	0	0	0	0	1	0	0	0	0	0
26246848	c0958	-	0	0	0	1	0	0	0	0	0	0	0	0	1	0	0	0	0	0
26246849	c0959	-	0	0	0	1	0	0	0	0	0	0	0	1	1	0	0	0	0	0
26246850	c0960	-	0	0	0	1	0	0	0	0	0	0	1	1	1	0	0	0	0	0
26246851	c0961	-	0	0	0	1	0	0	0	0	0	0	0	0	1	0	0	0	0	0
26246852	c0962	-	0	0	0	1	0	0	0	0	0	0	1	1	1	0	0	0	0	0
26246853	c0963	-	0	0	0	1	0	0	0	0	0	0	1	1	1	0	0	0	0	0
26246854	c0964	-	0	0	0	1	0	0	0	0	0	0	1	1	1	0	0	0	0	0
26246855	c0965	-	0	0	0	1	0	0	0	0	0	0	1	1	1	0	0	0	0	0
26246856	c0966	-	0	0	0	1	0	0	0	0	0	0	1	1	1	0	0	0	0	0
26246857	c0967	-	0	0	0	1	0	0	0	0	0	0	1	0	1	0	0	0	0	0
26246858	c0968	-	0	0	0	1	0	0	0	0	0	0	1	0	1	0	0	0	0	0
26246859	c0969	yfdK	0	0	0	0	0	0	0	0	0	0	0	0	1	0	0	0	0	0
26246860	c0970	-	0	0	0	0	0	0	0	0	0	0	0	0	0	0	0	0	0	0
26246861	c0971	-	0	0	0	1	0	0	0	0	0	0	0	1	1	0	0	0	0	0
26246862	c0972	-	0	0	0	1	0	0	0	0	0	0	0	1	1	0	0	0	0	0
26246863	c0973	-	0	0	0	1	0	0	0	0	0	0	0	1	1	0	0	0	0	0
26246864	c0974	-	0	0	0	1	0	0	0	0	0	0	0	1	1	0	0	0	0	0
26246865	c0975	-	0	0	0	1	0	0	0	0	0	0	0	1	1	0	0	0	0	0
26246866	c0976	-	0	0	0	1	0	0	0	0	0	0	0	0	1	0	0	0	0	0
26246867	c0977	-	0	0	0	1	0	0	0	0	0	0	0	1	1	0	0	0	0	0
26246868	c0978	-	0	0	0	1	0	0	0	0	0	0	0	1	1	0	0	0	0	0
26246869	c0979	ogrK	0	0	0	1	0	0	0	0	0	0	0	1	1	0	0	0	0	0
26246870	c0980	ybjL	1	1	1	1	1	1	1	1	1	1	1	1	1	1	1	1	1	1
26246871	c0981	ybjM	1	1	1	1	1	1	1	1	1	1	1	1	1	1	1	1	1	1
26246872	c0982	grxA	1	1	1	1	1	1	1	1	1	1	1	1	1	1	1	1	1	1
26246873	c0983	ybjC	1	1	1	1	1	1	1	1	1	1	1	1	1	1	1	1	1	1
26246874	c0984	mdaA	1	1	1	1	1	1	1	1	1	1	1	1	1	1	1	1	1	1
26246875	c0985	rimK	1	1	1	1	1	1	1	1	1	1	1	1	1	1	1	1	1	1
26246876	c0986	ybjN	1	1	1	1	1	1	1	1	1	1	1	1	1	1	1	1	1	1
26246877	c0987	potF	1	1	1	1	1	1	1	1	1	1	1	1	1	1	1	1	1	1
26246878	c0988	potG	1	1	1	1	1	1	1	1	1	1	1	1	1	1	1	1	1	1
26246879	c0989	potH	1	1	1	1	1	1	1	1	1	1	1	1	1	1	1	1	1	1
26246880	c0990	potI	1	1	1	1	1	1	1	1	1	1	1	1	1	1	1	1	1	1
26246881	c0991	ybjO	1	1	1	1	1	1	1	1	1	1	1	1	1	1	1	1	1	1
26246882	c0992	ybjF	1	1	1	1	1	1	1	1	1	1	1	1	1	1	1	1	1	1
26246883	c0993	artJ	1	1	1	1	1	1	1	1	1	1	1	1	1	1	1	1	1	1
26246884	c0994	artM	1	1	1	1	1	1	1	1	1	1	1	1	1	1	1	1	1	1
26246885	c0995	artQ	1	1	1	1	1	1	1	1	1	1	1	1	1	1	1	1	1	1
26246886	c0996	artI	1	1	1	1	1	1	1	1	1	1	1	1	1	1	1	1	1	1
26246887	c0997	artP	1	1	1	1	1	1	1	1	1	1	1	1	1	1	1	1	1	1
26246888	c0998	ybjP	1	1	1	1	1	1	1	1	1	1	1	1	1	1	1	1	1	1
26246889	c0999	ybjQ	1	1	1	1	1	1	1	1	1	1	1	1	1	1	1	1	1	1
26246890	c1000	ybjR	1	1	1	1	1	1	1	1	1	1	1	1	1	1	1	1	1	1
26246891	c1001	-	1	1	1	1	1	1	1	1	1	1	1	1	1	1	1	1	1	1
26246892	c1002	ybjT	1	1	1	1	1	1	1	1	1	1	1	1	1	1	1	1	1	1
26246893	c1003	ybjU	1	1	1	1	1	1	1	1	1	1	1	1	1	1	1	1	1	1
26246894	c1004	poxB	1	1	1	1	1	1	1	1	1	1	1	1	1	1	1	1	1	1
26246895	c1005	-	1	1	1	1	1	1	1	1	1	1	1	1	1	1	1	1	1	1
26246896	c1006	ybjW	1	1	1	1	1	1	1	1	1	1	1	1	1	1	1	1	1	1
26246897	c1007	ybjE	1	1	1	1	1	1	1	1	1	1	1	1	1	1	1	1	1	1
26246898	c1008	-	1	1	1	1	1	1	1	1	0	1	1	1	1	1	1	1	1	1
26246899	c1009	aqpZ	1	1	1	1	1	1	1	1	1	1	1	1	1	1	1	1	1	1
26246900	c1010	-	1	1	1	1	1	1	1	1	1	1	1	1	1	1	1	1	1	1
26246901	c1011	ybjD	1	1	1	1	1	1	1	1	1	1	1	1	1	1	1	1	1	1
26246902	c1012	ybjX	1	1	1	1	1	1	1	1	1	1	1	1	1	1	1	1	1	1
26246903	c1013	-	1	1	1	1	1	1	1	1	1	1	1	1	1	1	1	1	1	1
26246904	c1014	macA	1	1	1	1	1	1	1	1	1	1	1	1	1	1	1	1	1	1
26246905	c1016	-	1	1	1	1	1	1	1	1	1	1	1	1	1	1	1	1	1	1
26246906	c1017	cspD	1	1	1	1	1	1	1	1	1	1	1	1	1	1	1	1	1	1
26246907	c1018	clpS	1	1	1	1	1	1	1	1	1	1	1	1	1	1	1	1	1	1
26246908	c1019	clpA	1	1	1	1	1	1	1	1	1	1	1	1	1	1	1	1	1	1
26246909	c1020	-	1	1	1	1	1	1	1	1	0	1	1	1	1	1	1	1	1	1
26246910	c1021	infA	1	1	1	1	1	1	1	1	1	1	1	1	1	1	1	1	1	1
26246911	c1022	aat	1	1	1	1	1	1	1	1	1	1	1	1	1	1	1	1	1	1
26246912	c1023	cydC	1	1	1	1	1	1	1	1	1	1	1	1	1	1	1	1	1	1
26246913	c1024	cydD	1	1	1	1	1	1	1	1	1	1	1	1	1	1	1	1	1	1
26246914	c1025	trxB	1	1	1	1	1	1	1	1	1	1	1	1	1	1	1	1	1	1
26246915	c1026	lrp	1	1	1	1	1	1	1	1	1	1	1	1	1	1	1	1	1	1
26246916	c1027	ftsK	1	1	1	1	1	1	1	1	1	1	1	1	1	1	1	1	1	1
26246917	c1028	lolA	1	1	1	1	1	1	1	1	1	1	1	1	1	1	1	1	1	1
26246918	c1029	ycaJ	1	1	1	1	1	1	1	1	1	1	1	1	1	1	1	1	1	1
26246919	c1030	serS	1	1	1	1	1	1	1	1	1	1	1	1	1	1	1	1	1	1
26246920	c1031	dmsA	1	1	1	1	1	1	1	1	1	1	1	1	1	1	1	1	1	1
26246921	c1032	dmsB	1	1	1	1	1	1	1	1	1	1	1	1	1	1	1	1	1	0
26246922	c1033	dmsC	1	1	1	1	1	1	1	1	1	1	1	1	1	1	1	1	1	1
26246923	c1034	ycaC	1	1	1	1	1	1	1	1	1	1	1	1	1	1	1	1	1	1
26246924	c1035	-	1	1	1	1	1	1	1	1	1	1	1	1	1	1	1	1	1	1
26246925	c1036	-	1	1	1	1	1	1	1	1	1	1	1	1	1	1	1	1	1	1
26246926	c1037	ycaD	1	1	1	1	1	1	1	1	1	1	1	1	1	1	1	1	1	1
26246927	c1038	pflA	1	1	1	1	1	1	1	1	1	1	1	1	1	1	1	1	1	1
26246928	c1040	-	1	1	1	1	1	1	1	1	1	1	1	1	1	1	1	1	1	1
26246929	c1042	focA_2	1	1	1	1	1	1	1	1	1	1	1	1	1	1	1	1	1	1
26246930	c1043	ycaO	1	1	1	1	1	1	1	1	1	1	1	1	1	1	1	1	1	1
26246931	c1044	ycaP	1	1	1	1	1	1	1	1	1	1	1	1	1	1	1	1	1	1
26246932	c1045	serC	1	1	1	1	1	1	1	1	1	1	1	1	1	1	1	1	1	1
26246933	c1046	aroA	1	1	1	1	1	1	1	1	1	1	1	1	1	1	1	1	1	1
26246934	c1047	ycaL	1	1	1	1	1	1	1	1	1	1	1	1	1	1	1	1	1	1
26246935	c1048	cmk	1	1	1	1	1	1	1	1	1	1	1	1	1	1	1	1	1	1
26246936	c1049	rpsA	1	1	1	1	1	1	1	1	1	1	1	1	1	1	1	1	1	1
26246937	c1050	himD	1	1	1	1	1	1	1	1	1	1	1	1	1	1	1	1	1	1
26246938	c1051	-	1	1	1	1	1	1	1	1	1	1	1	1	1	1	1	1	1	1
26246939	c1052	ycaI	1	1	1	1	1	1	1	1	1	1	1	1	1	1	1	1	1	1
26246940	c1053	-	1	1	1	1	1	1	1	1	1	1	1	1	1	1	1	1	1	1
26246941	c1054	msbA	1	1	1	1	1	1	1	1	1	1	1	1	1	1	1	1	1	1
26246942	c1057	ycaQ	1	1	1	1	1	1	1	1	1	1	1	1	1	1	1	1	1	1
26246943	c1058	ycaR	1	1	1	1	1	1	1	1	1	1	1	1	1	1	1	1	1	1
26246944	c1059	kdsB	1	1	1	1	1	1	1	1	1	1	1	1	1	1	1	1	1	1
26246945	c1060	ycbJ	1	1	1	1	1	1	1	1	1	1	1	1	1	1	1	1	1	1
26246946	c1061	ycbC	1	1	1	1	1	1	1	1	1	1	1	1	1	1	1	1	1	1
26246947	c1062	-	1	1	1	1	1	1	1	1	1	1	1	1	1	1	1	1	1	1
26246948	c1063	smtA	1	1	1	1	1	1	1	1	1	1	1	1	1	1	1	1	1	1
26246949	c1064	mukF	1	1	1	1	1	1	1	1	1	1	1	1	1	1	1	1	1	1
26246950	c1065	mukE	1	1	1	1	1	1	1	1	1	1	1	1	1	1	1	1	1	1
26246951	c1066	mukB	1	1	1	1	1	1	1	1	1	1	1	1	1	1	1	1	1	1
26246952	c1067	ycbB	1	1	1	1	1	1	1	1	1	1	1	1	1	1	1	1	1	1
26246953	c1068	ycbK	1	1	1	1	1	1	1	1	1	1	1	1	1	1	1	1	1	1
26246954	c1069	ycbL	1	1	1	1	1	1	1	1	1	1	1	1	1	1	1	1	1	1
26246955	c1070	aspC	1	1	1	1	1	1	1	1	1	1	1	1	1	1	1	1	1	1
26246956	c1071	ompF	1	1	1	1	1	1	1	1	1	1	1	1	1	1	1	1	1	1
26246957	c1072	asnS	1	1	1	1	1	1	1	1	1	1	1	1	1	1	1	1	1	1
26246958	c1073	pncB	1	1	1	1	1	1	1	1	1	1	1	1	1	1	1	1	1	1
26246959	c1074	-	1	1	1	1	1	1	1	1	1	1	1	1	1	1	1	1	1	1
26246960	c1075	pepN	1	1	1	1	1	1	1	1	1	1	1	1	1	1	1	1	1	1
26246961	c1076	ycbE	1	1	1	1	1	1	1	1	1	1	1	1	1	1	1	1	1	1
26246962	c1077	ycbM	1	1	1	1	1	1	1	1	1	1	1	1	1	1	1	1	1	1
26246963	c1078	ycbN	1	1	1	1	1	1	1	1	1	1	1	1	1	1	1	1	1	1
26246964	c1079	ycbO	1	1	1	1	1	1	1	1	1	1	1	1	1	1	1	1	1	1
26246965	c1080	ycbP	1	1	1	1	1	1	1	1	1	1	1	1	1	1	1	1	1	1
26246966	c1081	pyrD	1	1	1	1	1	1	1	1	1	1	1	1	1	1	1	1	1	1
26246967	c1082	ycbW	1	1	1	1	1	1	1	1	1	1	1	1	1	1	1	1	1	1
26246968	c1083	ycbX	1	1	1	1	1	0	1	1	1	1	1	1	1	1	1	1	1	1
26246969	c1084	ycbY	1	1	1	1	1	1	1	1	1	1	1	1	1	1	1	1	1	1
26246970	c1085	uup	1	1	1	1	1	1	1	1	1	1	1	1	1	1	1	1	1	1
26246971	c1086	pqiA	1	1	1	1	1	1	1	1	1	1	1	1	1	1	1	1	1	1
26246972	c1087	pqiB	1	1	1	1	1	1	1	1	1	1	1	1	1	1	1	1	1	1
26246973	c1088	ymbA	1	1	1	1	1	0	1	1	1	1	1	1	1	1	1	1	1	1
26246974	c1089	-	1	1	1	1	1	0	1	1	1	1	1	1	1	1	1	1	1	1
26246975	c1090	fabA	1	1	1	1	1	0	1	1	1	1	1	1	1	1	1	1	1	1
26246976	c1091	-	0	1	1	1	1	0	1	0	0	0	0	1	1	1	1	1	1	1
26246977	c1092	ycbG	0	1	1	1	1	0	1	0	0	0	0	1	1	1	1	1	1	1
26246978	c1093	ompA	0	1	1	1	1	1	1	1	0	1	1	1	1	1	1	1	1	1
26246979	c1094	-	1	1	1	1	1	1	1	1	0	1	1	1	1	1	1	1	1	1
26246980	c1095	sulA	1	1	1	1	1	1	1	1	1	1	1	1	1	1	1	1	1	1
26246981	c1096	yccR	1	1	1	1	1	1	1	1	1	1	1	1	1	1	1	1	1	1
26246982	c1097	yccS	1	1	1	1	1	1	1	1	1	1	1	1	1	1	1	1	1	1
26246983	c1098	yccF	1	1	1	1	1	1	1	1	1	1	1	1	1	1	1	1	1	1
26246984	c1099	helD	1	1	1	1	1	1	1	1	1	1	1	1	1	1	1	1	1	1
26246985	c1100	mgsA	1	1	1	1	1	1	1	1	1	1	1	1	1	1	1	1	1	1
26246986	c1101	yccT	1	1	1	1	1	1	1	1	1	1	1	1	1	1	1	1	1	1
26246987	c1102	-	1	1	1	1	1	1	1	1	1	1	1	1	1	1	1	1	1	1
26246988	c1103	-	1	1	1	1	1	1	1	1	1	1	1	1	1	1	1	1	1	1
26246989	c1104	yccV	1	1	1	1	1	1	1	1	1	1	1	1	1	1	1	1	1	1
26246990	c1105	yccW	1	1	1	1	1	1	1	1	1	1	1	1	1	1	1	1	1	1
26246991	c1106	-	1	1	1	1	1	1	1	1	1	1	1	1	1	1	1	1	1	1
26246992	c1107	yccK	1	1	1	1	1	1	1	1	1	1	1	1	1	1	1	1	1	1
26246993	c1108	-	1	1	1	1	1	1	1	1	1	1	1	1	1	1	1	1	1	1
26246994	c1109	-	1	1	1	1	1	1	1	1	1	1	1	1	1	1	1	1	1	1
26246995	c1110	yccA	1	1	1	1	1	1	1	1	1	1	1	1	1	1	1	1	1	1
26246996	c1111	-	1	1	1	1	1	1	1	1	1	1	1	1	1	1	1	1	1	1
26246997	c1112	-	1	1	1	1	1	1	1	1	1	1	1	1	1	1	1	1	1	1
26246998	c1113	hyaA	1	1	1	1	1	1	1	1	1	1	1	1	1	1	1	1	1	1
26246999	c1114	hyaB	1	1	1	1	1	1	1	1	1	1	1	1	1	1	1	1	1	1
26247000	c1115	hyaC	1	1	1	1	1	1	1	1	1	1	1	1	1	1	1	1	1	1
26247001	c1116	hyaD	1	1	1	1	1	1	1	1	1	1	1	1	1	1	1	1	1	1
26247002	c1117	hyaE	1	1	1	1	1	1	1	1	1	1	1	1	1	1	1	1	1	1
26247003	c1118	hyaF	1	1	1	1	1	1	1	1	1	1	1	1	1	1	1	1	1	1
26247004	c1119	appC	1	1	1	1	1	1	1	1	1	1	1	1	1	1	1	1	1	1
26247005	c1120	appB	1	1	1	1	1	1	1	1	1	1	1	1	1	1	1	1	1	1
26247006	c1121	appA	1	1	1	1	1	1	1	1	1	1	1	1	1	1	1	1	1	1
26247007	c1122	cspH	1	1	1	1	1	1	1	1	1	1	1	1	1	1	1	1	1	1
26247008	c1123	cspG	1	1	1	1	1	1	1	1	1	1	1	1	1	1	1	1	1	0
26247009	c1124	sfa	1	1	1	1	1	1	1	1	1	1	1	1	1	1	1	1	1	0
26247010	c1125	-	1	1	1	1	1	1	1	1	1	1	1	1	1	1	1	1	1	0
26247011	c1126	-	1	1	1	1	1	1	1	1	1	1	1	1	1	1	1	1	1	0
26247012	c1127	yccM	1	1	1	1	1	1	1	1	1	1	1	1	1	1	1	1	1	1
26247013	c1128	torS	1	1	1	1	1	1	1	1	1	1	1	1	1	1	1	1	1	1
26247014	c1129	-	1	1	1	1	1	1	1	1	1	1	1	1	1	1	1	1	1	1
26247015	c1130	torT	1	1	1	1	1	1	1	1	1	1	1	1	1	1	1	1	1	1
26247016	c1131	torR	1	1	1	1	1	1	1	1	1	1	1	1	1	1	1	1	1	1
26247017	c1132	torC	1	1	1	1	1	1	1	1	1	1	1	1	1	1	1	1	1	1
26247018	c1133	torA	1	1	1	1	1	1	1	1	1	1	1	1	1	1	1	1	1	1
26247019	c1134	torD	1	1	1	1	1	1	1	1	1	1	1	1	1	1	1	1	1	1
26247020	c1135	yccD	1	1	1	1	1	1	1	1	1	1	1	1	1	1	1	1	1	1
26247021	c1136	cbpA	1	1	1	1	1	1	1	1	1	1	1	1	1	1	1	1	1	1
26247022	c1137	agp	1	1	1	1	1	1	1	1	1	1	1	1	1	1	1	1	1	1
26247023	c1138	-	1	1	1	1	1	1	1	1	1	1	1	1	1	1	1	1	1	1
26247024	c1139	yccJ	1	1	1	1	1	1	1	1	1	1	1	1	1	1	1	1	1	1
26247025	c1140	wrbA	1	1	1	1	1	1	1	1	1	1	1	1	1	1	1	1	1	1
26247026	c1141	-	1	1	1	1	1	1	1	1	1	1	1	1	1	1	1	1	1	1
26247027	c1142	-	1	1	1	1	1	1	1	1	1	1	1	1	1	1	1	1	1	1
26247028	c1143	ycdG	1	1	1	1	1	1	1	1	1	1	1	1	1	1	1	1	1	1
26247029	c1144	-	1	1	1	1	1	1	1	1	1	1	1	1	1	1	1	1	1	1
26247030	c1145	-	1	1	1	1	1	1	1	1	1	1	1	1	1	1	1	1	1	1
26247031	c1146	ycdJ	1	1	1	1	1	1	1	1	1	1	1	1	1	1	1	1	1	1
26247032	c1147	ycdK	1	1	1	1	1	1	1	1	1	1	1	1	1	1	1	1	1	1
26247033	c1148	ycdL	1	1	1	1	1	1	1	1	1	1	1	1	1	1	1	1	1	1
26247034	c1149	-	1	1	1	1	1	1	1	1	1	1	1	1	1	1	1	1	1	1
26247035	c1150	ycdC	1	1	1	1	1	1	1	1	1	1	1	1	1	1	1	1	1	1
26247036	c1151	putA	1	1	1	1	1	1	1	1	1	1	1	1	1	1	1	1	0	1
26247037	c1152	-	1	1	1	1	1	1	1	1	1	1	1	1	1	1	1	1	0	1
26247038	c1153	-	1	1	1	1	1	1	1	1	1	1	1	1	1	1	1	1	0	1
26247039	c1154	putP	1	1	1	1	1	1	1	1	1	1	1	1	1	1	1	1	0	1
26247040	c1155	-	1	1	1	1	1	1	1	1	1	1	1	1	1	1	1	1	1	0
26247041	c1156	ycdO	1	1	1	1	1	1	1	1	1	1	1	1	1	1	1	1	1	0
26247042	c1157	ycdB	1	1	1	1	1	1	1	1	1	1	1	1	1	1	1	1	1	0
26247043	c1158	-	1	1	1	1	1	1	1	1	1	1	1	1	1	1	1	1	1	0
26247044	c1159	phoH	1	1	1	1	1	1	1	1	1	1	1	1	1	1	1	1	1	0
26247045	c1160	ycdP	1	1	1	0	0	1	1	1	0	1	1	0	1	1	1	1	0	0
26247046	c1161	ycdQ	1	1	1	0	0	1	1	1	0	1	1	0	1	1	1	1	0	0
26247047	c1162	ycdR	1	1	1	0	0	1	1	1	0	1	1	0	1	1	1	1	0	0
26247048	c1163	ycdS	1	1	1	0	0	1	1	1	0	1	1	0	1	1	1	1	0	0
26247049	c1164	ycdT	1	1	1	0	0	1	1	1	0	1	1	0	1	1	1	1	0	0
26247050	c1165	-	0	0	1	0	0	0	0	0	0	1	0	0	0	0	1	1	0	0
26247051	c1166	-	0	0	1	0	0	0	0	0	0	1	0	0	0	0	1	1	0	0
26247052	c1167	-	0	0	1	0	0	0	0	0	0	1	0	0	0	0	1	1	0	0
26247053	c1168	-	0	0	1	0	0	0	0	0	0	1	0	0	0	0	1	1	0	0
26247054	c1169	alpA	0	0	1	1	0	0	0	0	0	1	0	0	0	0	1	1	0	0
26247055	c1170	-	0	0	1	1	0	0	0	0	0	1	0	0	0	0	1	1	0	0
26247056	c1171	-	0	0	1	1	0	0	0	0	0	1	0	0	0	0	1	1	0	0
26247057	c1172	-	0	0	1	0	0	0	0	0	0	0	0	0	0	0	0	0	0	0
26247058	c1173	-	0	0	1	0	0	0	0	0	0	0	0	0	0	0	0	0	0	0
26247059	c1174	-	0	0	1	0	0	0	0	0	0	0	0	0	0	0	0	0	0	0
26247060	c1175	-	0	0	1	0	0	0	0	0	0	0	0	0	0	0	0	0	0	0
26247061	c1176	-	0	0	1	0	0	0	0	0	0	0	0	0	0	0	0	0	0	0
26247062	c1183	-	0	0	1	0	0	0	0	0	0	0	0	0	0	0	0	0	0	0
26247063	c1184	-	0	0	0	0	0	0	0	0	0	0	0	0	0	0	0	0	0	0
26247064	c1185	-	0	0	1	0	0	0	0	0	0	0	0	0	0	0	0	0	0	0
26247065	c1186	-	0	0	0	0	1	0	0	0	0	0	0	0	0	0	1	1	0	0
26247066	c1187	fabG	0	0	0	0	1	0	0	0	0	0	0	0	0	0	1	1	0	0
26247067	c1188	-	0	0	0	0	1	0	0	0	0	0	0	0	0	0	1	1	0	0
26247068	c1189	-	0	0	0	0	1	0	0	0	0	0	0	0	0	0	1	1	0	0
26247069	c1190	-	0	0	0	0	1	0	0	0	0	0	0	0	0	0	1	1	0	0
26247070	c1191	-	0	0	0	0	1	0	0	0	0	0	0	0	0	0	1	1	0	0
26247071	c1192	-	0	0	0	0	1	0	0	0	0	0	0	0	0	0	1	1	0	0
26247072	c1193	-	0	0	0	0	1	0	0	0	0	0	0	0	0	0	1	1	0	0
26247073	c1194	-	0	0	0	0	1	0	0	0	0	0	0	0	0	0	1	1	0	0
26247074	c1195	-	0	0	0	0	1	0	0	0	0	0	0	0	0	0	1	1	0	0
26247075	c1196	-	0	0	0	0	1	0	0	0	0	0	0	0	0	0	1	1	0	0
26247076	c1197	-	0	0	0	0	1	0	0	0	0	0	0	0	0	0	1	1	0	0
26247077	c1198	-	0	0	0	0	1	0	0	0	0	0	0	0	0	0	1	1	0	0
26247078	c1199	-	0	0	0	0	1	0	0	0	0	0	0	0	0	0	1	1	0	0
26247079	c1200	-	0	0	0	0	1	0	0	0	0	0	0	0	0	0	1	1	0	0
26247080	c1201	-	0	0	0	0	1	0	0	0	0	0	0	0	0	0	1	1	0	0
26247081	c1202	-	0	0	0	0	1	0	0	0	0	0	0	0	0	0	1	1	0	0
26247082	c1203	-	0	0	0	0	1	0	0	0	0	0	0	0	0	0	1	1	0	0
26247083	c1204	-	0	0	0	0	1	0	0	0	0	0	0	0	0	0	1	1	0	0
26247084	c1205	-	0	0	0	0	0	0	0	0	0	0	0	0	0	0	0	0	0	0
26247085	c1206	-	0	0	0	0	0	0	0	0	0	0	0	0	0	0	0	0	0	0
26247086	c1207	-	0	0	0	0	0	0	0	0	0	0	0	0	0	0	0	0	0	0
26247087	c1208	-	0	0	0	0	0	0	0	0	0	0	0	0	0	0	0	0	0	0
26247088	c1209	-	0	0	0	0	0	0	0	0	0	0	0	0	0	0	0	0	0	0
26247089	c1210	-	0	0	0	0	0	0	0	0	0	0	0	0	0	0	0	0	0	0
26247090	c1213	-	0	0	0	0	0	0	0	0	0	0	0	0	0	0	0	0	0	0
26247091	c1214	-	0	0	0	0	0	0	0	0	0	0	0	0	0	0	0	0	0	0
26247092	c1215	-	0	0	0	0	0	0	0	0	0	0	0	0	0	0	0	0	0	0
26247093	c1216	-	0	0	0	0	0	0	0	0	0	0	0	0	0	0	0	0	0	0
26247094	c1217	-	0	0	0	0	0	0	0	0	0	0	0	0	0	0	0	0	0	0
26247095	c1218	-	0	0	0	0	0	0	0	0	0	0	0	0	0	0	0	0	0	0
26247096	c1219	-	0	0	0	0	0	0	0	0	0	0	0	0	0	0	0	0	0	0
26247097	c1220	-	1	1	0	0	0	0	0	0	0	0	0	0	0	0	0	0	0	0
26247098	c1221	-	1	1	0	0	0	0	0	0	0	0	0	0	0	0	0	0	0	0
26247099	c1222	-	1	1	0	0	0	0	0	0	0	0	0	0	0	0	0	0	0	0
26247100	c1224	-	1	1	0	0	0	0	0	0	0	0	0	0	1	0	0	0	0	0
26247101	c1225	-	0	1	0	0	0	0	0	0	0	0	0	0	1	0	0	0	0	0
26247102	c1227	mchB	1	0	0	0	1	0	0	0	0	0	0	0	0	0	0	0	0	0
26247103	c1229	mchC	0	0	0	0	1	0	0	0	0	0	0	0	0	0	0	0	0	0
26247104	c1230	mchD	0	0	0	0	1	0	0	0	0	0	0	0	0	0	0	0	0	0
26247105	c1231	mchE	0	0	0	0	1	0	0	0	0	0	0	0	0	0	0	0	0	0
26247106	c1232	mchF	1	1	0	0	1	0	0	0	0	0	0	0	0	0	0	0	0	0
26247107	c1233	-	1	1	0	0	1	0	0	0	0	0	0	0	0	0	1	0	0	0
26247108	c1234	-	1	1	0	0	1	0	0	0	0	0	0	0	0	0	1	0	0	0
26247109	c1235	-	1	1	1	0	1	0	0	0	0	0	0	0	0	0	1	0	0	0
26247110	c1236	-	1	1	1	1	0	0	0	0	0	0	0	0	0	0	1	0	0	0
26247111	c1237	sfaC	1	1	1	0	0	0	0	0	0	0	0	0	0	0	0	0	0	0
26247112	c1238	sfaB	1	1	1	0	0	0	0	0	0	0	0	0	0	0	0	0	0	0
26247113	c1239	focA	1	1	1	1	0	0	0	0	0	0	0	0	0	0	0	0	0	0
26247114	c1240	sfaD	1	1	1	1	0	0	0	0	0	0	0	0	0	0	0	0	0	0
26247115	c1241	focC	1	1	1	1	0	0	0	0	0	0	0	0	0	0	0	0	0	0
26247116	c1242	focD	1	1	1	1	0	0	0	0	0	0	0	0	0	0	0	0	0	0
26247117	c1243	focF	1	1	1	1	0	0	0	0	0	0	0	0	0	0	0	0	0	0
26247118	c1244	focG	1	1	1	1	0	0	0	0	0	0	0	0	0	0	0	0	0	0
26247119	c1245	focH	1	1	1	1	0	0	0	0	0	0	0	0	0	0	0	0	0	0
26247120	c1246	-	1	1	1	0	0	0	0	0	0	0	0	0	0	0	0	0	0	0
26247121	c1247	focX	1	1	1	0	0	0	0	0	0	0	0	0	0	0	0	0	0	0
26247122	c1248	-	0	0	0	0	0	0	0	0	0	0	0	0	0	0	0	0	0	0
26247123	c1249	-	1	1	1	0	0	0	0	0	0	0	0	0	0	0	0	0	0	1
26247124	c1250	iroN	1	1	1	0	0	0	0	0	0	0	0	0	0	0	0	0	0	1
26247125	c1251	iroE	1	1	1	0	0	0	0	0	0	0	0	0	0	0	0	0	0	1
26247126	c1252	iroD	1	1	1	0	0	0	0	0	0	0	0	0	0	0	0	0	0	1
26247127	c1253	iroC	1	1	1	0	0	0	0	0	0	0	0	0	0	0	0	0	0	1
26247128	c1254	iroB	1	1	1	0	0	0	0	0	0	0	0	0	0	0	0	0	0	1
26247129	c1255	-	1	1	1	0	0	0	0	0	0	0	0	0	0	0	0	0	0	1
26247130	c1256	-	0	0	0	0	0	0	0	0	0	0	0	0	0	0	0	0	0	0
26247131	c1257	-	1	1	1	0	0	0	0	0	0	0	0	0	0	0	0	0	0	0
26247132	c1258	-	1	1	1	0	0	0	0	0	0	0	0	0	0	0	0	0	0	0
26247133	c1259	-	1	1	1	0	0	0	0	0	0	0	0	0	0	0	0	0	0	0
26247134	c1260	-	1	1	1	0	0	0	0	0	0	0	0	0	0	0	0	0	0	0
26247135	c1261	-	1	1	1	0	0	0	0	0	0	0	0	0	0	0	0	0	0	0
26247136	c1262	-	0	0	0	1	0	0	0	0	0	0	0	0	0	0	0	0	0	0
26247137	c1263	-	0	0	0	1	0	0	0	0	0	0	0	0	0	0	0	0	0	0
26247138	c1264	-	1	1	1	0	0	0	0	0	0	0	0	0	0	0	0	0	0	0
26247139	c1265	-	1	1	1	0	0	0	0	0	0	0	0	0	0	0	0	0	0	0
26247140	c1266	-	1	1	1	0	0	0	0	0	0	0	0	0	0	0	0	0	0	0
26247141	c1267	-	1	1	1	0	0	0	0	0	0	0	0	0	0	0	0	0	0	0
26247142	c1268	-	1	1	1	0	0	0	0	0	0	0	0	0	0	0	0	1	0	0
26247143	c1269	-	0	0	1	0	0	0	0	0	0	0	0	0	0	0	0	0	0	0
26247144	c1270	-	0	0	1	0	0	0	0	0	0	0	0	0	0	0	0	0	0	0
26247145	c1271	-	0	0	1	0	0	0	0	0	0	0	0	0	0	0	0	0	0	0
26247146	c1272	-	0	0	1	1	0	0	0	0	1	0	0	0	0	0	1	1	0	0
26247147	c1273	-	0	1	1	1	0	0	0	0	1	0	0	0	0	0	1	1	1	0
26247148	c1274	-	0	0	0	0	0	0	0	0	1	0	0	0	0	0	0	0	1	0
26247149	c1275	-	0	0	0	0	0	0	0	0	1	0	0	0	0	0	0	0	1	0
26247150	c1276	-	0	0	0	0	0	0	0	0	1	0	0	0	0	0	0	0	1	0
26247151	c1277	-	0	0	0	1	0	0	0	0	1	0	0	0	0	0	1	0	1	1
26247152	c1278	-	0	0	0	1	0	0	0	0	1	0	0	0	0	0	0	1	1	1
26247153	c1279	-	0	0	0	1	0	0	0	0	1	0	0	0	0	0	0	0	1	1
26247154	c1280	-	0	0	1	1	0	0	0	0	1	0	0	0	0	0	1	0	1	1
26247155	c1281	-	0	0	1	1	0	0	0	0	1	1	0	0	0	0	1	0	1	0
26247156	c1282	-	0	0	1	1	0	0	0	0	1	1	0	0	0	0	0	0	1	0
26247157	c1284	-	0	1	1	1	0	0	0	0	1	1	0	0	0	0	1	0	1	0
26247158	c1285	-	0	1	1	1	0	0	0	0	1	0	0	0	0	0	1	0	0	1
26247159	c1286	-	0	0	0	1	0	0	0	0	1	1	0	0	0	0	0	0	1	1
26247160	c1287	-	0	0	1	1	0	0	0	0	1	1	0	0	0	0	1	0	1	1
26247161	c1288	-	0	0	1	1	0	0	0	0	1	0	0	0	0	0	0	0	1	1
26247162	c1289	-	0	1	1	1	0	0	0	0	1	1	0	0	0	0	0	0	1	1
26247163	c1290	-	0	0	1	1	0	0	0	0	1	1	0	0	0	0	1	1	1	1
26247164	c1291	-	0	0	0	0	0	0	0	0	0	0	0	0	0	0	0	0	0	0
26247165	c1292	-	0	0	1	1	0	0	0	0	0	1	0	0	0	0	1	1	1	1
26247166	c1293	-	0	0	1	1	0	0	0	0	0	1	0	0	0	0	1	0	1	1
26247167	c1294	-	1	1	1	1	1	1	1	1	1	1	1	1	1	1	1	1	1	1
26247168	c1295	ycdW	1	1	1	1	1	1	1	1	1	1	1	1	1	1	1	1	1	1
26247169	c1296	ycdX	1	1	1	1	1	1	1	1	1	1	1	1	1	1	1	1	1	1
26247170	c1297	ycdY	1	1	1	1	1	1	1	1	1	1	1	1	1	1	1	1	1	1
26247171	c1298	ycdZ	1	1	1	1	1	1	1	1	1	1	1	1	1	1	1	1	1	1
26247172	c1299	csgG	1	1	1	1	1	1	1	1	1	1	1	1	1	1	1	1	1	1
26247173	c1300	csgF	1	1	1	1	1	1	1	1	1	1	1	1	1	1	1	1	1	1
26247174	c1301	csgE	1	1	1	1	1	1	1	1	1	1	1	1	1	1	1	1	1	1
26247175	c1302	csgD	1	1	1	1	1	1	1	1	1	1	1	1	1	1	1	1	1	1
26247176	c1303	-	1	1	1	1	1	1	1	1	1	1	1	1	1	1	1	1	1	0
26247177	c1304	-	1	1	1	1	1	1	1	1	1	1	1	1	1	1	1	1	1	0
26247178	c1305	csgB	1	1	1	1	1	1	1	1	1	1	1	1	1	1	1	1	1	0
26247179	c1306	csgA	1	1	1	1	1	1	1	1	1	1	1	1	1	1	1	1	1	0
26247180	c1307	csgC	1	1	1	1	1	1	1	1	1	1	1	1	1	1	1	1	1	1
26247181	c1308	ymdA	1	1	1	1	1	1	1	1	1	1	1	1	1	1	1	1	1	1
26247182	c1309	ymdB	1	1	1	1	1	1	1	1	1	1	1	1	1	1	1	1	1	1
26247183	c1310	ymdC	1	1	1	1	1	1	1	1	1	1	1	1	1	1	1	1	1	1
26247184	c1311	mdoC	1	1	1	1	1	1	1	1	1	1	1	1	1	1	1	1	1	1
26247185	c1312	-	1	1	1	1	1	1	1	1	1	1	1	1	1	1	1	1	1	1
26247186	c1313	mdoG	1	1	1	1	1	1	1	1	1	1	1	1	1	1	1	1	1	1
26247187	c1314	mdoH	1	1	1	1	1	1	1	1	1	1	1	1	1	1	1	1	1	1
26247188	c1315	-	1	1	1	1	1	1	1	1	1	1	1	1	1	1	1	1	1	1
26247189	c1316	yceK	1	1	1	1	1	1	1	1	1	1	1	1	1	1	1	1	0	1
26247190	c1317	-	1	1	1	1	1	1	1	1	1	1	1	1	1	1	1	1	0	1
26247191	c1318	msyB	1	1	1	1	1	1	1	1	1	1	1	1	1	1	1	1	0	1
26247192	c1319	yceE	1	1	1	1	1	1	1	1	1	1	1	1	1	1	1	1	1	1
26247193	c1320	htrB	1	1	1	1	1	1	1	1	1	1	1	1	1	1	1	1	1	1
26247194	c1321	yceA	1	1	1	1	1	1	1	1	1	1	1	1	1	1	1	1	1	1
26247195	c1322	yceI	1	1	1	1	1	1	1	1	1	1	1	1	1	1	1	1	1	1
26247196	c1323	-	1	1	1	1	1	1	1	1	1	1	1	1	1	1	1	1	1	1
26247197	c1324	-	1	1	1	1	1	1	1	1	1	1	1	1	1	1	1	1	1	1
26247198	c1325	yceO	1	1	1	1	1	1	1	1	1	1	1	1	1	1	1	1	1	1
26247199	c1326	solA	1	1	1	1	1	1	1	1	1	1	1	1	1	1	1	1	1	1
26247200	c1327	yceP	1	1	1	1	1	1	1	1	1	1	1	1	1	1	1	1	1	1
26247201	c1328	dinI	1	1	1	1	1	1	1	1	1	1	1	1	1	1	1	1	1	1
26247202	c1329	pyrC	1	1	1	1	1	1	1	1	1	1	1	1	1	1	1	1	1	1
26247203	c1330	yceB	1	1	1	1	1	1	1	1	1	1	1	1	1	1	1	1	1	1
26247204	c1331	grxB	1	1	1	1	1	1	1	1	1	1	1	1	1	1	1	1	1	1
26247205	c1332	yceL	1	1	1	1	1	1	1	1	1	1	1	1	1	1	1	1	1	1
26247206	c1333	rimJ	1	1	1	1	1	1	1	1	1	1	1	1	1	1	1	1	1	1
26247207	c1334	yceH	1	1	1	1	1	1	1	1	1	1	1	1	1	1	1	1	1	1
26247208	c1337	-	1	1	1	1	1	1	1	1	1	1	1	1	1	1	1	1	1	1
26247209	c1338	mviN	1	1	1	1	1	1	1	1	1	1	1	1	1	1	1	1	1	1
26247210	c1339	flgN	1	1	1	1	1	1	1	1	1	1	1	1	1	1	1	1	1	1
26247211	c1340	flgM	1	1	1	1	1	1	1	1	1	1	1	1	1	1	1	1	1	1
26247212	c1341	flgA	1	1	1	1	1	1	1	1	1	1	1	1	1	1	1	1	1	1
26247213	c1342	flgB	1	1	1	1	1	1	1	1	1	1	1	1	1	1	1	1	1	1
26247214	c1343	flgC	1	1	1	1	1	1	1	1	1	1	1	1	1	1	1	1	1	1
26247215	c1344	flgD	1	1	1	1	1	1	1	1	1	1	1	1	1	1	1	1	1	1
26247216	c1345	flgE	1	1	1	1	1	1	1	1	1	1	1	1	1	1	1	1	1	1
26247217	c1346	flgF	1	1	1	1	1	1	1	1	1	1	1	1	1	1	1	1	1	1
26247218	c1347	flgG	1	1	1	1	1	1	1	1	1	1	1	1	1	1	1	1	1	1
26247219	c1348	flgH	1	1	1	1	1	1	1	1	1	1	1	1	1	1	1	1	1	1
26247220	c1349	flgI	1	1	1	1	1	1	1	1	1	1	1	1	1	1	1	1	1	1
26247221	c1350	flgJ	1	1	1	1	1	1	1	1	1	1	1	1	1	1	1	1	1	1
26247222	c1351	flgK	1	1	1	1	1	1	1	1	1	1	1	1	1	1	1	1	1	1
26247223	c1352	flgL	1	1	1	1	1	1	1	1	1	1	1	1	1	1	1	1	1	1
26247224	c1353	rne	1	1	1	1	1	1	1	1	1	1	1	1	1	1	1	1	1	1
26247225	c1354	-	1	1	1	1	1	1	1	1	1	1	1	1	1	1	1	1	1	1
26247226	c1355	rluC	0	1	1	1	1	1	1	0	1	1	0	1	1	1	1	1	1	1
26247227	c1356	maf	0	1	1	1	1	1	1	0	0	0	0	1	1	1	1	1	1	1
26247228	c1357	-	0	1	1	1	1	1	1	0	0	0	0	1	1	1	1	1	1	1
26247229	c1358	yceD	0	1	1	1	1	1	1	0	0	0	0	1	1	1	1	1	1	1
26247230	c1359	plsX	0	1	1	1	1	0	1	0	0	0	0	1	1	1	1	1	1	1
26247231	c1360	fabH	0	1	1	1	1	0	1	0	0	0	0	1	1	1	1	1	1	1
26247232	c1361	fabD	0	1	1	1	1	0	1	0	0	0	0	1	1	1	1	1	1	1
26247233	c1363	-	1	1	1	1	1	0	1	1	0	0	1	1	1	1	1	1	1	1
26247234	c1364	acpP	1	1	1	1	1	0	1	0	0	0	0	1	1	1	1	1	1	1
26247235	c1365	fabF	1	1	1	1	1	0	1	1	0	1	1	1	1	1	1	1	1	1
26247236	c1366	pabC	1	1	1	1	1	1	1	1	0	1	1	1	1	1	1	1	1	1
26247237	c1367	-	1	1	1	1	1	1	1	1	0	1	1	1	1	1	1	1	1	1
26247238	c1368	-	1	1	1	1	1	1	1	1	0	1	1	1	1	1	1	1	1	1
26247239	c1369	yceG	1	1	1	1	1	1	1	1	0	1	1	1	1	1	1	1	1	1
26247240	c1370	tmk	1	1	1	1	1	1	1	0	0	0	0	1	1	1	1	1	1	1
26247241	c1371	holB	1	1	1	1	1	1	1	0	0	1	0	1	1	1	1	1	1	1
26247242	c1372	ycfH	1	1	1	1	1	1	1	0	1	1	0	1	1	1	1	1	1	1
26247243	c1373	ptsG	1	1	1	1	1	1	1	1	1	1	1	1	1	1	1	1	1	1
26247244	c1374	fhuE	1	1	1	1	1	1	1	1	1	1	1	1	1	1	1	1	1	1
26247245	c1375	-	1	1	1	1	1	1	1	1	1	1	1	1	1	1	1	1	1	1
26247246	c1376	ycfF	1	1	1	1	1	1	1	1	1	1	1	1	1	1	1	1	1	1
26247247	c1377	ycfL	1	1	1	1	1	1	1	1	1	1	1	1	1	1	1	1	1	1
26247248	c1378	ycfM	1	1	1	1	1	1	1	1	1	1	1	1	1	1	1	1	1	1
26247249	c1379	ycfN	1	1	1	1	1	1	1	1	1	1	1	1	1	1	1	1	1	1
26247250	c1380	nagZ	1	1	1	1	1	1	1	1	1	1	1	1	1	1	1	1	1	1
26247251	c1381	ycfP	1	1	1	1	1	1	1	1	1	1	1	1	1	1	1	1	1	1
26247252	c1382	ndh	1	1	1	1	1	1	1	1	1	1	1	1	1	1	1	1	1	1
26247253	c1383	ycfJ	1	1	1	1	1	1	1	1	1	1	1	1	1	1	1	1	1	1
26247254	c1384	-	0	0	0	0	0	0	0	0	0	0	0	0	0	0	0	0	0	0
26247255	c1385	ycfQ	1	1	1	1	1	1	1	1	1	1	1	1	1	1	1	1	1	1
26247256	c1386	ycfR	1	1	1	1	1	1	1	1	1	1	1	1	1	1	1	1	1	1
26247257	c1387	ycfS	1	1	1	1	1	1	1	1	1	1	1	1	1	1	1	1	1	1
26247258	c1389	mfd	1	1	1	1	1	1	1	1	1	1	1	1	1	1	1	1	1	1
26247259	c1390	ycfT	1	1	1	1	1	1	1	1	1	1	1	1	1	1	1	1	1	1
26247260	c1391	lolC	1	1	1	1	1	1	1	1	1	1	1	1	1	1	1	1	1	1
26247261	c1392	lolD	1	1	1	1	1	1	1	1	1	1	1	1	1	1	1	1	1	1
26247262	c1393	lolE	1	1	1	1	1	1	1	1	1	1	1	1	1	1	1	1	1	1
26247263	c1394	ycfX	1	1	1	1	1	1	1	1	1	1	1	1	1	1	1	1	1	1
26247264	c1395	cobB	1	1	1	1	1	1	1	1	1	1	1	1	1	1	1	1	1	1
26247265	c1396	ycfZ	1	1	1	1	1	1	1	1	1	1	1	0	0	1	0	0	0	0
26247266	c1397	ymfA	1	1	1	1	1	1	1	1	1	1	1	1	1	1	1	1	1	1
26247267	c1398	potD	1	1	1	1	1	1	1	1	1	1	1	1	1	1	1	1	1	1
26247268	c1399	potC	1	1	1	1	1	1	1	1	1	1	1	1	1	1	1	1	1	1
26247269	c1400	-	1	1	1	1	0	1	1	1	1	1	1	0	0	1	1	1	0	0
26247270	c1401	xisN	1	1	1	1	0	1	1	1	1	1	1	0	0	0	1	1	0	0
26247271	c1402	recE	0	0	1	0	1	1	0	0	1	0	0	0	0	0	0	0	0	0
26247272	c1403	-	0	0	1	1	1	1	0	1	0	0	1	0	0	1	0	0	0	0
26247273	c1404	ydfD	0	0	1	0	1	1	1	1	0	0	1	0	0	1	0	0	0	0
26247274	c1405	dicB	0	0	1	1	1	1	0	0	1	0	0	0	0	1	0	0	0	0
26247275	c1406	-	0	0	1	1	1	1	1	1	0	1	1	0	0	1	0	0	0	0
26247276	c1407	ydfC	0	0	1	1	1	1	0	0	1	0	1	0	0	1	0	0	0	0
26247277	c1408	ydfB	0	0	1	1	0	0	0	0	1	0	1	0	0	1	0	0	0	0
26247278	c1409	ydfA	0	0	1	1	1	0	1	0	1	0	1	0	0	1	0	0	0	0
26247279	c1410	-	0	0	0	1	0	0	0	1	1	0	0	0	0	1	0	0	0	0
26247280	c1411	-	0	0	1	1	0	0	1	0	1	0	1	0	0	0	0	0	0	0
26247281	c1412	-	0	0	1	1	0	0	1	0	1	1	0	0	0	0	0	0	0	0
26247282	c1413	-	0	0	1	1	0	1	1	0	0	0	1	0	0	0	0	0	0	0
26247283	c1414	-	0	0	0	0	0	1	0	0	0	1	0	0	0	0	0	0	0	0
26247284	c1415	-	0	0	0	0	0	1	0	0	0	1	0	0	0	0	0	0	0	0
26247285	c1416	-	0	0	0	0	1	1	0	0	0	0	0	0	0	0	0	0	0	0
26247286	c1417	-	0	0	0	0	1	1	0	0	0	0	0	0	0	0	0	0	0	0
26247287	c1418	-	0	0	0	0	0	1	0	0	0	0	0	0	0	0	0	0	0	1
26247288	c1419	-	0	0	1	1	0	0	0	0	1	1	0	1	0	1	0	0	0	1
26247289	c1420	-	0	0	1	1	0	0	0	0	1	1	0	1	0	1	0	0	0	1
26247290	c1421	-	0	0	1	1	1	0	1	0	1	1	1	1	0	1	1	0	0	1
26247291	c1422	-	0	0	1	0	1	0	1	0	1	1	0	1	0	1	0	0	0	1
26247292	c1423	-	0	0	1	1	1	0	0	0	1	1	0	1	0	1	0	0	0	1
26247293	c1424	-	0	0	1	1	1	0	0	0	0	1	1	1	0	0	0	0	1	1
26247294	c1425	-	1	1	1	0	1	0	0	0	0	1	1	0	0	0	1	0	1	1
26247295	c1426	-	0	0	1	0	1	0	0	0	0	1	0	0	0	1	1	0	1	1
26247296	c1427	-	0	0	0	0	0	0	0	0	0	0	0	0	0	0	0	0	1	0
26247297	c1428	-	0	0	0	0	1	0	0	0	0	1	0	0	0	0	0	0	1	1
26247298	c1429	ycgW	0	0	0	0	1	0	0	0	0	0	0	0	0	0	0	0	1	0
26247299	c1430	-	0	0	0	0	1	0	0	0	0	0	0	0	0	0	0	0	1	1
26247300	c1431	-	0	0	1	0	1	0	0	0	0	1	0	1	0	0	0	0	1	1
26247301	c1432	-	0	0	1	1	1	0	0	0	0	0	0	1	0	0	0	0	1	1
26247302	c1433	-	0	1	1	1	1	0	0	0	0	0	0	1	0	0	0	0	1	0
26247303	c1434	ydfR	1	0	1	1	1	0	0	0	0	0	0	1	0	1	0	0	0	1
26247304	c1435	-	0	0	1	0	0	0	0	0	0	0	0	0	0	0	0	0	0	0
26247305	c1436	-	1	1	1	1	1	0	0	0	0	0	0	1	0	1	0	0	0	0
26247306	c1437	-	1	1	0	0	1	0	0	0	0	0	0	0	0	0	0	0	0	0
26247307	c1438	-	0	0	0	0	0	0	0	0	0	0	0	0	0	0	0	0	0	0
26247308	c1439	-	0	0	0	0	0	0	0	0	0	0	0	0	0	0	0	0	0	0
26247309	c1440	ydfO	0	0	1	0	0	0	0	0	0	0	0	1	0	1	0	1	0	0
26247310	c1441	-	0	0	1	1	1	0	0	0	1	0	0	1	0	1	0	1	0	0
26247311	c1442	-	0	0	1	1	1	0	0	0	1	0	0	1	0	1	1	1	0	0
26247312	c1443	-	1	1	1	1	0	0	0	0	1	1	0	1	0	1	1	1	0	0
26247313	c1444	-	1	1	0	1	0	0	0	0	1	1	0	1	0	1	1	1	1	0
26247314	c1445	-	1	1	1	1	1	0	0	0	1	1	0	1	0	0	1	1	1	0
26247315	c1446	-	1	1	1	0	1	0	0	0	1	1	0	1	0	0	1	1	1	0
26247316	c1447	-	1	1	0	0	1	0	0	0	1	1	0	1	0	0	1	1	1	0
26247317	c1448	-	1	1	0	1	1	1	0	0	1	1	0	1	0	0	1	1	1	0
26247318	c1449	-	1	1	0	1	1	1	0	0	1	1	0	1	0	0	0	1	1	0
26247319	c1450	-	1	1	1	1	1	1	0	0	1	1	0	1	0	0	1	1	1	0
26247320	c1451	-	1	1	1	1	1	1	0	0	1	1	0	1	0	0	1	1	1	0
26247321	c1452	-	0	0	1	1	1	0	0	0	1	1	0	0	0	0	1	1	1	0
26247322	c1453	-	1	1	1	1	1	0	0	0	1	1	0	0	0	0	1	1	1	0
26247323	c1454	-	1	1	1	1	1	1	0	0	1	1	0	1	0	0	1	1	1	0
26247324	c1455	-	1	1	1	1	1	1	0	0	1	1	0	1	0	0	1	1	1	0
26247325	c1456	-	1	1	1	1	1	0	0	0	1	1	0	1	0	0	1	0	1	0
26247326	c1457	-	1	1	1	1	1	0	0	0	0	1	0	1	0	0	0	0	0	0
26247327	c1458	-	1	1	1	1	1	0	0	0	0	1	0	1	0	0	0	0	1	0
26247328	c1459	-	1	1	1	1	1	0	0	0	0	1	0	1	0	0	0	0	1	0
26247329	c1460	-	1	1	0	1	1	0	0	0	0	0	0	0	0	0	0	0	1	0
26247330	c1461	-	1	1	0	1	0	1	0	0	0	1	0	1	0	0	0	0	1	0
26247331	c1462	-	1	1	1	1	1	1	0	0	0	0	0	1	0	0	0	0	1	0
26247332	c1463	-	1	1	0	1	0	1	0	0	0	1	0	1	0	0	0	0	0	0
26247333	c1464	-	0	1	0	0	0	0	0	0	0	0	0	1	0	0	0	0	1	0
26247334	c1465	-	1	1	0	1	0	1	0	0	0	0	0	1	0	0	0	0	1	0
26247335	c1466	-	0	1	1	1	1	0	0	0	0	0	0	0	0	0	0	0	1	0
26247336	c1467	lomP	0	0	1	1	0	0	1	0	0	0	0	1	0	0	0	0	1	0
26247337	c1468	-	0	1	0	1	0	0	1	0	0	0	0	1	0	0	0	0	1	0
26247338	c1469	-	0	1	0	1	0	0	1	0	0	0	0	1	0	0	0	0	0	0
26247339	c1470	-	0	1	0	0	0	0	0	0	0	0	0	0	0	0	0	0	0	0
26247340	c1471	-	0	1	0	0	0	0	0	0	1	0	0	0	0	0	0	0	0	0
26247341	c1472	-	0	1	0	0	0	0	1	0	1	0	0	0	0	0	0	1	0	0
26247342	c1473	-	0	0	0	0	1	0	1	0	1	0	0	1	0	0	0	1	0	0
26247343	c1474	-	0	0	0	0	1	0	1	0	1	0	0	0	0	0	0	1	0	0
26247344	c1475	ylcE	0	0	0	1	1	0	1	0	1	0	0	1	0	0	0	1	0	0
26247345	c1476	potB	1	1	1	1	1	1	1	1	1	1	1	0	1	1	1	1	1	0
26247346	c1477	potA	1	1	1	1	1	1	1	1	1	1	1	0	1	1	1	1	1	0
26247347	c1478	-	1	1	1	1	1	1	1	1	1	1	1	0	1	1	1	1	1	0
26247348	c1479	pepT	1	1	1	1	1	1	1	1	1	1	1	0	1	1	1	1	1	0
26247349	c1480	ycfD	1	1	1	1	1	1	1	1	1	1	1	0	1	1	1	1	1	0
26247350	c1481	-	0	0	0	0	1	0	0	0	0	1	0	0	0	0	1	1	1	0
26247351	c1482	-	0	0	0	0	1	0	0	0	0	1	0	0	0	0	1	1	1	0
26247352	c1483	-	0	0	0	0	1	0	0	0	0	0	0	0	0	0	1	1	1	0
26247353	c1484	-	0	0	0	0	1	0	0	0	0	1	0	0	0	0	1	1	1	0
26247354	c1485	-	0	0	0	0	1	0	0	0	0	1	0	0	0	0	1	1	1	0
26247355	c1486	-	0	0	0	0	1	0	0	0	0	1	0	0	0	0	0	0	1	0
26247356	c1487	-	0	0	0	0	0	0	0	0	0	1	0	0	0	0	1	1	1	0
26247357	c1488	-	0	0	0	0	0	0	0	0	0	0	0	0	0	0	1	1	0	0
26247358	c1489	-	0	0	0	0	1	0	0	0	0	1	0	0	0	0	0	0	1	0
26247359	c1490	-	0	0	0	0	1	0	0	0	0	1	0	0	0	0	0	0	1	0
26247360	c1491	-	0	0	0	0	1	0	0	0	0	1	0	0	0	0	0	0	1	0
26247361	c1492	-	0	0	0	0	1	0	0	0	0	1	0	0	0	0	0	0	1	0
26247362	c1493	-	0	0	0	0	1	0	0	0	0	1	0	0	0	0	1	1	1	0
26247363	c1494	-	0	0	0	0	1	0	0	0	0	1	0	0	0	0	1	1	1	0
26247364	c1495	-	0	0	0	0	0	0	0	0	0	0	0	0	0	0	0	0	1	0
26247365	c1496	-	0	0	0	0	1	0	0	0	0	0	0	0	0	0	1	1	1	0
26247366	c1497	-	0	0	0	0	1	0	0	0	0	0	0	0	0	0	1	1	1	0
26247367	c1498	-	0	0	0	0	1	0	0	0	0	0	0	0	0	0	0	0	0	0
26247368	c1499	-	0	0	0	0	1	0	0	0	0	1	0	0	0	0	0	0	0	0
26247369	c1500	-	0	0	0	0	1	0	0	0	0	1	0	0	0	0	0	0	0	0
26247370	c1501	-	0	0	0	0	1	0	0	0	0	0	0	0	0	0	0	0	0	0
26247371	c1502	-	0	0	0	0	1	0	0	0	0	0	0	0	0	0	0	0	0	0
26247372	c1503	-	0	0	0	0	1	0	0	0	0	0	0	0	0	0	0	0	0	0
26247373	c1504	-	0	0	0	0	1	0	0	0	0	0	0	0	0	0	0	0	0	0
26247374	c1505	-	0	0	0	0	1	0	0	0	0	1	0	0	0	0	1	1	1	0
26247375	c1506	-	0	0	0	0	1	0	0	0	0	1	0	0	0	0	1	1	1	0
26247376	c1507	-	0	0	0	0	0	0	0	0	0	0	0	0	0	0	0	0	1	0
26247377	c1508	phoQ	1	1	1	1	1	1	1	1	1	1	1	1	1	1	1	1	1	1
26247378	c1509	phoP	1	1	1	1	1	1	1	1	1	1	1	1	1	1	1	1	1	1
26247379	c1510	purB	1	1	1	1	1	1	1	1	1	1	1	1	1	1	1	1	1	1
26247380	c1511	ycfC	1	1	1	1	1	1	1	1	1	1	1	1	1	1	1	1	1	1
26247381	c1512	ycfB	1	1	1	1	1	1	1	1	1	1	1	1	1	1	1	1	1	1
26247382	c1513	-	1	1	1	1	1	1	1	1	1	1	1	1	1	1	1	1	1	1
26247383	c1514	-	1	1	1	1	1	1	1	1	1	1	1	1	1	1	1	1	1	1
26247384	c1515	-	1	1	1	1	1	1	1	1	1	1	1	1	1	1	1	1	1	1
26247385	c1516	-	1	1	1	1	1	1	1	1	1	1	1	1	1	1	1	1	1	1
26247386	c1517	icdA	1	1	1	1	1	1	1	1	1	1	1	1	1	1	1	1	1	1
26247387	c1518	-	1	1	1	0	0	0	0	0	0	0	0	0	0	0	1	1	0	0
26247388	c1519	-	1	1	1	0	0	0	0	0	0	0	0	0	0	1	1	1	0	0
26247389	c1520	-	0	0	0	0	0	0	0	0	0	0	0	0	0	0	0	0	0	0
26247390	c1521	-	0	0	0	0	0	0	0	0	0	0	0	0	0	0	0	0	0	0
26247391	c1522	-	1	1	1	0	0	0	0	0	0	0	0	0	0	0	0	0	0	0
26247392	c1523	-	0	0	0	0	0	0	0	0	0	0	0	0	0	0	0	0	0	0
26247393	c1524	-	0	0	0	0	0	0	0	0	1	0	0	0	0	0	0	0	0	0
26247394	c1525	-	0	0	0	0	0	0	0	0	1	0	0	0	0	0	0	0	0	0
26247395	c1526	-	0	0	0	0	0	0	0	0	0	0	0	0	0	0	0	0	0	0
26247396	c1527	-	0	0	0	0	0	0	0	0	0	1	0	0	0	0	0	0	0	0
26247397	c1528	-	0	0	0	0	0	0	0	0	0	0	0	0	0	0	0	0	0	0
26247398	c1529	-	0	0	0	0	0	0	0	0	0	0	0	0	0	0	0	0	0	0
26247399	c1530	-	0	0	0	0	0	0	0	0	0	0	0	0	0	0	0	0	0	0
26247400	c1531	-	0	0	0	0	0	0	0	0	0	1	0	0	0	0	0	0	0	0
26247401	c1532	-	1	1	1	0	0	0	1	0	1	1	0	0	0	0	0	0	0	0
26247402	c1533	-	1	1	1	0	0	0	1	0	1	1	1	0	0	1	0	0	0	0
26247403	c1534	-	1	1	1	0	0	0	1	0	1	0	1	0	0	1	0	0	0	0
26247404	c1535	-	1	1	1	0	0	0	1	0	1	1	1	0	0	1	0	0	0	0
26247405	c1536	-	1	1	1	0	0	0	1	0	1	0	1	0	0	0	0	1	0	0
26247406	c1537	gamW	1	1	1	0	0	0	1	0	1	0	1	0	0	0	0	1	0	0
26247407	c1538	-	1	1	1	0	0	0	1	0	1	1	1	0	0	0	0	1	0	0
26247408	c1539	-	0	0	1	0	0	0	0	1	0	1	0	0	0	0	0	1	0	0
26247409	c1540	-	0	0	1	0	0	0	0	1	0	1	0	0	0	0	0	0	0	0
26247410	c1541	-	0	0	1	0	0	0	0	1	0	0	0	0	0	0	0	1	0	0
26247411	c1542	-	0	0	1	0	0	0	0	0	0	0	0	0	0	0	0	0	0	0
26247412	c1543	-	0	0	1	0	0	0	0	0	0	0	0	0	0	0	0	0	0	0
26247413	c1544	-	0	0	1	0	0	0	0	0	0	0	0	0	0	0	0	0	0	0
26247414	c1545	-	0	0	1	0	0	0	0	0	0	0	0	0	0	0	0	0	0	0
26247415	c1546	-	0	0	1	1	0	0	0	1	0	1	0	0	0	0	0	0	0	0
26247416	c1547	-	0	0	1	1	0	0	0	1	0	0	0	0	0	0	0	0	0	0
26247417	c1548	-	0	0	1	1	0	0	0	1	0	1	0	0	0	0	0	1	0	0
26247418	c1549	-	1	1	1	1	0	0	1	1	1	1	0	0	0	0	0	1	0	0
26247419	c1550	-	1	1	1	1	0	0	1	0	1	0	1	0	0	1	1	1	0	0
26247420	c1551	-	0	0	1	1	0	0	1	1	0	0	0	0	0	1	0	1	0	0
26247421	c1552	-	0	0	0	0	0	0	0	0	0	0	0	0	0	0	0	0	0	0
26247422	c1553	-	0	0	0	0	0	0	0	0	0	0	0	0	0	0	0	0	0	0
26247423	c1554	-	0	0	1	0	0	0	0	0	0	1	1	0	0	0	0	0	0	0
26247424	c1555	-	0	0	1	0	0	0	0	0	0	1	1	0	0	0	0	1	0	0
26247425	c1556	-	0	0	1	0	0	0	0	0	0	0	0	0	0	0	0	0	0	0
26247426	c1557	rus	1	1	1	1	0	0	1	0	1	0	0	1	0	1	1	1	0	0
26247427	c1558	-	1	1	1	0	0	0	1	0	1	0	1	1	0	1	1	1	0	0
26247428	c1559	ybcQ	1	1	1	0	0	0	1	1	1	1	1	1	0	1	0	0	1	0
26247429	c1560	nmpC	1	1	1	0	0	0	1	1	1	0	1	1	0	1	0	0	0	0
26247430	c1561	-	1	1	1	0	0	0	1	0	1	0	0	1	0	1	0	0	0	0
26247431	c1562	ybcS	1	1	1	0	0	0	1	0	1	0	0	0	0	1	0	0	1	0
26247432	c1563	-	1	1	1	0	0	0	1	1	1	0	1	0	0	1	1	1	1	0
26247433	c1564	ybcU	1	1	1	0	0	0	0	1	1	0	1	0	0	1	1	1	0	0
26247434	c1565	-	1	1	1	0	0	0	0	0	0	0	0	0	0	0	0	0	0	0
26247435	c1566	-	1	1	1	0	0	0	0	0	0	0	0	0	0	0	0	0	0	0
26247436	c1567	-	1	1	1	0	0	0	0	0	0	0	0	0	0	0	0	0	0	0
26247437	c1568	nohA	1	1	1	0	1	0	1	0	1	0	0	1	0	0	0	0	1	0
26247438	c1569	-	1	1	1	0	1	0	1	0	1	1	0	1	0	0	0	0	1	0
26247439	c1570	-	1	1	1	0	1	0	0	0	1	1	0	1	0	0	0	0	1	0
26247440	c1571	-	1	1	1	0	1	0	0	0	1	1	0	1	0	0	0	0	1	0
26247441	c1572	-	1	1	1	1	1	0	0	0	1	1	0	1	0	0	0	0	1	0
26247442	c1573	-	1	1	1	1	1	0	0	0	1	1	0	1	0	0	0	0	1	0
26247443	c1574	-	1	1	1	1	1	0	0	0	1	1	0	1	0	0	0	0	1	0
26247444	c1575	-	1	1	1	1	1	0	0	0	1	1	0	1	0	0	0	1	1	0
26247445	c1576	-	1	1	1	1	1	0	0	0	1	1	0	1	0	0	0	1	1	0
26247446	c1577	-	1	1	1	1	1	0	0	0	1	1	0	1	0	0	0	1	1	0
26247447	c1578	-	1	1	1	1	1	0	0	1	1	1	1	1	0	0	1	1	1	0
26247448	c1579	-	1	1	1	1	1	0	0	1	1	1	1	1	0	0	1	1	1	0
26247449	c1580	-	1	1	1	1	1	0	0	1	1	1	1	1	0	0	1	1	0	0
26247450	c1581	-	1	1	1	1	1	0	0	1	1	1	1	1	0	0	1	1	0	0
26247451	c1583	-	1	1	1	1	1	0	0	1	1	1	1	1	0	0	1	1	0	0
26247452	c1584	-	1	1	1	1	1	0	0	1	1	1	1	1	0	0	1	1	0	0
26247453	c1585	-	1	1	1	1	1	0	0	0	1	1	0	1	0	0	1	0	0	0
26247454	c1586	-	1	1	1	1	1	0	0	1	1	1	1	1	0	0	1	0	0	0
26247455	c1587	-	1	1	1	1	1	0	0	0	1	1	0	1	0	0	1	0	0	0
26247456	c1588	-	1	1	1	1	1	0	0	0	1	1	0	1	0	0	1	0	0	0
26247457	c1589	-	1	1	1	1	1	0	0	0	1	1	0	1	0	0	1	0	0	0
26247458	c1590	-	0	1	1	1	1	0	0	1	1	1	1	1	0	0	1	0	0	0
26247459	c1591	-	1	1	1	1	1	0	1	1	1	0	1	1	0	0	1	1	0	0
26247460	c1592	-	0	1	1	0	0	0	1	1	1	1	1	1	0	0	1	1	0	0
26247461	c1593	-	1	1	1	0	0	0	0	0	0	0	0	0	0	0	0	0	0	0
26247462	c1594	-	1	1	1	0	1	0	0	0	0	0	0	0	0	0	0	0	0	0
26247463	c1595	-	1	1	1	0	1	0	0	0	0	0	0	0	0	0	0	0	0	0
26247464	c1596	-	1	1	1	0	1	0	1	1	0	0	0	0	0	0	0	0	0	0
26247465	c1597	sitD	1	1	1	0	1	0	0	0	0	0	0	0	0	0	0	0	0	0
26247466	c1598	sitC	1	1	1	0	1	0	0	0	0	0	0	0	0	0	0	0	0	0
26247467	c1599	sitB	1	1	1	0	1	0	0	0	0	0	0	0	0	0	0	0	0	0
26247468	c1600	sitA	1	1	1	0	1	0	0	0	0	0	0	0	0	0	0	0	0	0
26247469	c1601	-	0	0	1	0	0	0	0	0	0	0	0	0	0	0	0	0	0	0
26247470	c1602	-	0	1	1	1	1	1	1	1	0	0	1	1	1	1	0	0	1	0
26247471	c1603	ycgX	1	1	1	1	1	1	1	1	0	1	1	1	1	1	0	0	0	0
26247472	c1604	ycgE	1	1	1	1	1	1	1	1	0	1	1	1	1	1	0	0	0	0
26247473	c1605	-	1	1	1	1	1	1	1	1	1	1	1	1	1	1	0	0	0	0
26247474	c1606	ycgF	1	1	1	1	1	1	1	1	1	1	1	1	1	1	0	0	0	0
26247475	c1607	ycgZ	1	1	1	1	1	1	1	1	1	1	1	0	1	1	0	0	0	0
26247476	c1608	-	1	1	1	1	1	1	1	1	1	1	1	0	1	1	0	0	0	0
26247477	c1609	ymgB	1	1	0	1	1	1	1	1	1	1	1	0	1	1	0	0	0	0
26247478	c1610	-	1	1	0	1	1	1	1	1	1	1	1	0	1	1	0	0	1	0
26247479	c1611	-	1	1	1	1	1	1	1	1	1	1	1	0	1	1	0	0	1	0
26247480	c1615	-	1	1	1	1	1	1	1	1	1	1	1	0	1	1	0	0	1	0
26247481	c1616	ymgD	1	1	1	1	1	1	1	1	1	1	1	1	1	1	0	0	1	0
26247482	c1617	-	1	1	1	1	1	1	1	1	1	1	1	1	1	1	0	0	1	0
26247483	c1618	-	1	1	1	1	1	1	1	1	1	1	1	1	1	1	0	0	1	1
26247484	c1619	-	1	1	1	1	0	1	0	1	1	0	1	0	1	0	0	0	1	1
26247485	c1620	-	1	1	1	1	1	1	1	1	1	1	1	1	1	1	1	1	1	1
26247486	c1621	minE	1	1	1	1	1	1	1	1	1	1	1	1	1	1	1	1	1	1
26247487	c1622	minD	1	1	1	1	1	1	1	1	1	1	1	1	1	1	1	1	1	1
26247488	c1623	minC	1	1	1	1	1	1	1	1	1	1	1	1	1	1	1	1	1	1
26247489	c1624	-	1	1	1	1	1	1	1	1	1	1	1	1	1	1	1	1	1	1
26247490	c1625	ycgJ	1	1	1	1	1	1	1	1	1	1	1	1	1	1	1	1	1	1
26247491	c1626	ycgK	1	1	1	1	1	1	1	1	1	1	1	1	1	1	1	1	1	1
26247492	c1627	ycgL	1	1	1	1	1	1	1	0	1	1	0	1	1	1	1	1	1	1
26247493	c1628	-	1	1	1	1	1	1	1	0	1	1	0	1	1	1	1	1	1	1
26247494	c1629	ycgN	1	1	1	1	1	1	1	1	1	1	1	1	1	1	1	1	1	1
26247495	c1630	-	1	1	1	1	1	1	1	1	1	1	1	1	1	1	1	1	1	1
26247496	c1631	umuD	1	1	1	1	1	1	1	1	1	1	1	1	1	1	1	1	1	1
26247497	c1632	umuC	1	1	1	1	1	0	1	1	1	1	1	1	1	1	1	1	1	1
26247498	c1633	dsbB	1	1	1	1	1	1	1	1	1	1	0	1	1	1	1	1	1	1
26247499	c1634	nhaB	1	1	1	1	1	1	1	1	1	1	0	1	1	1	1	1	1	1
26247500	c1635	fadR	1	1	1	1	1	1	1	1	1	1	0	1	1	1	1	1	1	1
26247501	c1636	-	1	1	1	0	0	0	0	0	0	0	0	0	0	0	0	0	0	0
26247502	c1637	ycgB	1	1	1	1	1	1	1	1	1	1	0	1	1	1	1	1	1	1
26247503	c1638	dadA	1	1	1	1	1	1	1	1	1	1	1	1	1	1	1	1	1	1
26247504	c1639	alr	1	1	1	1	1	1	1	1	1	1	1	1	1	1	1	1	1	1
26247505	c1640	ycgO	1	1	1	1	1	1	1	1	1	1	1	1	1	1	1	1	1	1
26247506	c1641	ldcA	1	1	1	1	1	1	1	1	1	1	1	1	1	1	1	1	1	1
26247507	c1642	-	1	1	1	1	1	1	1	1	1	1	1	1	1	1	1	1	1	1
26247508	c1643	mltE	1	1	1	1	1	1	1	1	1	1	1	1	1	1	1	1	1	1
26247509	c1644	ycgR	1	1	1	1	1	1	1	1	1	1	1	1	1	1	1	1	1	1
26247510	c1645	ymgE	1	1	1	1	1	1	1	1	1	1	1	1	1	1	1	1	1	1
26247511	c1646	prrA	1	1	1	1	1	0	0	0	0	0	0	0	0	0	1	1	1	1
26247512	c1647	modD	1	1	1	1	1	0	0	0	0	0	0	0	0	0	1	1	1	1
26247513	c1648	-	1	1	1	1	1	0	0	0	0	0	0	0	0	0	1	1	1	1
26247514	c1649	-	1	1	1	1	1	0	0	0	0	0	0	0	0	0	1	1	1	1
26247515	c1650	-	1	1	1	1	1	0	0	0	0	0	0	0	0	0	1	1	1	1
26247516	c1651	fecD	1	1	1	1	1	0	0	0	0	0	0	0	0	0	1	1	1	1
26247517	c1652	-	1	1	1	1	1	0	0	0	0	0	0	0	0	0	1	1	1	1
26247518	c1653	-	1	1	1	1	1	0	0	0	0	0	0	0	0	0	1	1	0	1
26247519	c1654	treA	1	1	1	1	1	1	1	1	1	1	1	0	1	1	1	1	1	1
26247520	c1655	-	1	1	1	1	1	1	1	1	1	1	1	0	1	1	1	1	1	1
26247521	c1656	ycgC	1	1	1	1	1	1	1	1	1	1	1	0	1	1	1	1	1	1
26247522	c1657	-	1	1	1	1	1	1	1	1	1	1	1	0	1	1	1	1	1	1
26247523	c1658	ycgT	1	1	1	1	1	1	1	1	1	1	1	0	1	1	1	1	1	0
26247524	c1659	-	1	1	1	1	1	1	1	1	1	1	1	0	1	1	0	0	1	1
26247525	c1660	-	1	1	1	1	0	0	0	0	0	0	0	0	0	0	0	0	0	0
26247526	c1661	ychF	1	1	1	1	1	1	1	1	1	1	1	1	1	1	1	1	1	1
26247527	c1662	pth	1	1	1	1	1	1	1	1	1	1	1	1	1	1	1	1	1	1
26247528	c1663	ychH	1	1	1	1	1	1	1	1	1	1	1	1	1	1	1	1	1	1
26247529	c1664	ychM	1	1	1	1	1	1	1	1	1	1	1	1	1	1	1	1	1	1
26247530	c1665	prsA	1	1	1	1	1	1	1	1	1	1	1	1	1	1	1	1	1	1
26247531	c1666	ispE	1	1	1	1	1	1	1	1	1	1	1	1	1	1	1	1	1	1
26247532	c1667	lolB	1	1	1	1	1	1	1	1	1	1	1	1	1	1	1	1	1	1
26247533	c1668	hemA	1	1	1	1	1	1	1	1	1	1	1	1	1	1	1	1	1	1
26247534	c1669	prfA	1	1	1	1	1	1	1	1	1	1	1	1	1	1	1	1	1	1
26247535	c1670	hemK	1	1	1	1	1	1	1	1	1	1	1	1	1	1	1	1	1	1
26247536	c1671	-	1	1	1	1	1	1	1	1	1	1	1	1	1	1	1	1	1	1
26247537	c1672	ychA	1	1	1	1	1	1	1	1	1	1	1	1	1	1	1	1	1	1
26247538	c1673	-	1	1	1	1	1	1	1	1	1	1	1	1	1	1	1	1	1	1
26247539	c1674	kdsA	1	1	1	1	1	1	1	1	1	1	1	1	1	1	1	1	1	1
26247540	c1675	-	1	1	1	0	1	1	1	1	1	0	1	1	0	1	1	1	1	0
26247541	c1676	chaA	1	1	1	1	1	1	1	1	1	1	1	1	1	1	1	1	1	1
26247542	c1677	chaB	1	1	1	1	1	1	1	1	1	1	1	1	1	1	1	1	1	1
26247543	c1678	chaC	1	1	1	1	1	1	1	1	1	1	1	1	1	1	1	1	1	1
26247544	c1679	ychN	1	1	1	1	1	1	1	1	1	1	1	1	1	1	1	1	1	1
26247545	c1680	ychP	1	1	1	1	1	1	1	1	1	1	1	1	1	1	1	1	1	1
26247546	c1681	narL	1	1	1	1	1	1	1	1	1	1	1	1	1	1	1	1	1	1
26247547	c1682	narX	1	1	1	1	1	1	1	1	1	1	1	1	1	1	1	1	1	1
26247548	c1683	-	1	1	1	1	1	1	1	1	1	1	1	1	1	1	1	1	1	1
26247549	c1684	narK	1	1	1	1	1	1	1	1	1	1	1	1	1	1	1	1	1	1
26247550	c1685	narG	1	1	1	1	1	1	1	1	1	1	1	1	1	1	1	1	1	1
26247551	c1686	narH	1	1	1	1	1	1	1	1	1	1	1	1	1	1	1	1	1	1
26247552	c1687	narJ	1	1	1	1	1	1	1	1	1	1	1	1	1	1	1	1	1	1
26247553	c1688	narI	1	1	1	1	1	1	1	1	1	1	1	1	1	1	1	1	1	1
26247554	c1689	-	0	0	0	1	0	0	0	0	0	0	0	0	0	0	0	0	0	0
26247555	c1690	-	0	0	0	1	0	0	0	0	0	0	0	0	0	0	0	0	0	0
26247556	c1691	-	0	0	0	1	0	0	0	0	0	0	0	0	0	0	0	0	0	0
26247557	c1692	-	0	0	0	1	0	0	0	0	0	0	0	0	0	0	0	0	0	0
26247558	c1693	-	0	0	0	1	0	0	0	0	0	0	0	0	0	0	0	0	0	0
26247559	c1694	-	0	0	0	1	0	0	0	0	0	0	0	0	0	0	0	0	0	0
26247560	c1695	-	0	0	0	1	0	0	0	0	0	0	0	0	0	0	0	0	0	0
26247561	c1696	purU	1	1	1	1	1	1	1	1	1	1	1	1	1	1	1	1	1	1
26247562	c1697	ychJ	1	1	1	1	1	1	1	1	1	1	1	1	1	1	1	1	1	1
26247563	c1698	ychK	1	1	1	1	1	1	1	1	1	1	1	1	1	1	1	1	1	1
26247564	c1699	hnr	1	1	1	1	1	1	1	1	1	1	1	1	1	1	1	1	1	1
26247565	c1700	galU	1	1	1	1	1	1	1	1	1	1	1	1	1	1	1	1	1	1
26247566	c1701	hns	1	1	1	1	1	1	1	1	1	1	1	1	1	1	1	1	1	1
26247567	c1702	-	1	1	1	1	1	1	1	1	1	1	1	1	1	1	1	1	1	1
26247568	c1703	tdk	1	1	1	1	1	1	1	1	1	1	1	1	1	1	1	1	1	1
26247569	c1704	-	1	1	1	1	1	1	1	1	1	0	1	0	1	0	1	1	0	0
26247570	c1705	adhE	1	1	1	1	1	1	1	1	1	1	1	1	1	1	1	1	1	1
26247571	c1706	ychE	1	1	1	1	1	1	1	1	1	1	1	1	1	1	1	1	1	0
26247572	c1707	oppA	1	1	1	1	1	1	1	1	1	1	1	1	1	1	1	1	1	1
26247573	c1708	oppB	1	1	1	1	1	1	1	1	1	1	1	1	1	1	1	1	1	1
26247574	c1709	oppC	1	1	1	1	1	1	1	1	1	1	1	1	1	1	1	1	1	1
26247575	c1710	oppD	1	1	1	1	1	1	1	1	1	1	1	1	1	1	1	1	1	1
26247576	c1711	oppF	1	1	1	1	1	1	1	1	1	1	1	1	1	1	1	1	1	1
26247577	c1712	yciU	1	1	1	1	1	1	1	1	1	1	1	1	1	1	1	1	1	1
26247578	c1713	cls	1	1	1	1	1	1	1	1	1	1	1	1	1	1	1	1	1	1
26247579	c1714	-	1	1	1	1	1	1	1	1	1	1	1	1	1	1	1	1	1	1
26247580	c1715	kch	1	1	1	1	1	1	1	1	1	1	1	1	1	1	1	1	1	1
26247581	c1716	yciI	1	1	1	1	1	1	1	1	1	1	1	0	1	1	1	1	1	1
26247582	c1717	tonB	1	1	1	1	1	1	1	1	1	1	1	1	1	1	1	1	1	1
26247583	c1718	-	1	1	1	1	1	1	1	1	1	1	1	1	1	1	1	1	1	1
26247584	c1719	yciA	1	1	1	1	1	1	1	1	1	1	1	1	1	1	1	1	1	1
26247585	c1720	ispZ	1	1	1	1	1	1	1	1	1	1	1	1	1	1	1	1	1	1
26247586	c1721	yciC	1	1	1	1	1	1	1	1	1	1	1	1	1	1	1	1	1	1
26247587	c1722	ompW	1	1	1	1	1	1	1	1	1	1	1	1	1	1	1	1	1	1
26247588	c1723	yciE	1	1	1	0	1	1	1	1	1	1	1	0	1	1	1	1	1	1
26247589	c1724	yciF	1	1	1	0	1	1	1	1	1	1	1	0	1	1	1	1	1	1
26247590	c1725	trpA	1	1	1	1	1	1	1	1	1	1	1	1	1	1	1	1	1	1
26247591	c1726	trpB	1	1	1	1	1	1	1	1	1	1	1	1	1	1	1	1	1	1
26247592	c1729	trpD	1	1	1	1	1	1	1	1	1	1	1	1	1	1	1	1	1	1
26247593	c1730	trpE	1	1	1	1	1	1	1	1	1	1	1	1	1	1	1	1	1	1
26247594	c5494	trpL	1	1	1	1	1	1	1	1	1	1	1	1	1	1	1	1	1	1
26247595	c1731	trpH	1	1	1	1	1	1	1	1	1	1	1	1	1	1	1	1	1	1
26247596	c1732	yciO	1	1	1	1	1	1	0	1	1	1	1	1	1	1	1	1	1	1
26247597	c1733	yciQ	1	1	1	1	1	0	0	0	0	0	0	1	1	1	1	1	0	1
26247598	c1734	yciL	1	1	1	1	1	1	1	1	1	1	1	1	1	1	1	1	1	1
26247599	c1735	btuR	1	1	1	1	1	1	1	1	1	1	1	1	1	1	1	1	1	1
26247600	c1736	yciK	1	1	1	1	1	1	1	1	1	1	1	1	1	1	1	1	1	1
26247601	c1737	sohB	1	1	1	1	1	1	1	1	1	1	1	1	1	1	1	1	1	1
26247602	c1738	-	0	0	0	0	0	0	0	1	0	0	0	0	0	0	0	0	0	0
26247603	c1739	yciN	1	1	1	1	1	1	1	1	1	1	1	1	1	1	1	1	1	1
26247604	c1740	-	1	1	1	1	1	1	1	1	1	1	1	1	1	1	1	1	1	1
26247605	c1741	topA	1	1	1	1	1	1	1	1	1	1	1	1	1	1	1	1	1	1
26247606	c1742	cysB	1	1	1	1	1	1	1	1	1	1	1	1	1	1	1	1	1	1
26247607	c1743	-	1	1	1	1	1	1	1	1	1	1	1	1	1	1	1	1	1	1
26247608	c1744	-	1	1	1	1	1	1	1	1	1	1	1	1	1	1	1	1	1	1
26247609	c1745	acnA	1	1	1	1	1	1	1	1	1	1	1	1	1	1	1	1	1	1
26247610	c1746	ribA	1	1	1	1	1	1	1	1	1	1	1	1	1	1	1	1	1	1
26247611	c1747	pgpB	1	1	1	1	1	1	1	1	1	1	1	1	1	1	1	1	1	1
26247612	c1748	yciS	1	1	1	1	1	1	1	1	1	1	1	1	1	1	1	1	1	1
26247613	c1749	yciM	1	1	1	1	1	1	1	1	1	1	1	1	1	1	1	1	1	1
26247614	c1750	pyrF	1	1	1	1	1	1	1	1	1	1	1	1	1	1	1	1	1	1
26247615	c1751	yciH	1	1	1	1	1	1	1	1	1	1	1	1	1	1	1	1	1	1
26247616	c1752	-	1	1	1	1	1	1	1	1	1	1	1	1	1	1	1	1	1	1
26247617	c1753	osmB	1	1	1	1	1	1	1	1	1	1	1	1	1	1	1	1	1	0
26247618	c1754	yciT	1	1	1	1	1	1	1	1	1	1	1	1	1	1	1	1	1	1
26247619	c1755	-	1	1	1	1	1	1	1	1	1	1	1	1	1	1	1	1	1	1
26247620	c1756	yciR	1	1	1	1	1	1	1	1	1	1	1	1	1	1	1	1	1	1
26247621	c1757	rnb	1	1	1	1	1	1	1	1	1	1	1	1	1	1	1	1	1	1
26247622	c1758	yciW	1	1	1	1	1	1	1	1	1	1	1	1	1	1	1	1	1	1
26247623	c1759	fabI	1	1	1	1	1	1	1	1	1	1	1	1	1	1	1	1	1	1
26247624	c1760	-	1	1	1	1	0	0	0	0	0	0	0	0	0	0	1	1	0	1
26247625	c1761	-	1	1	1	1	0	0	0	0	0	0	0	0	0	0	1	1	0	0
26247626	c1762	-	1	1	1	1	0	0	0	0	0	0	0	0	0	0	1	1	0	1
26247627	c1763	-	1	1	1	1	0	0	0	0	0	0	0	0	0	0	1	1	0	1
26247628	c1764	-	1	1	1	1	0	0	0	0	0	0	0	0	0	0	1	1	0	1
26247629	c1765	-	1	1	1	1	0	0	0	0	0	0	0	0	0	0	1	1	0	1
26247630	c1766	-	1	1	1	1	0	0	0	0	0	0	0	0	0	0	1	1	0	1
26247631	c1767	sapF	1	1	1	1	1	1	1	1	1	1	1	1	1	1	1	1	1	1
26247632	c1768	sapD	1	1	1	1	1	1	1	1	1	1	1	1	1	1	1	1	1	1
26247633	c1769	sapC	1	1	1	1	1	1	1	1	1	1	1	1	1	1	1	1	1	1
26247634	c1770	sapB	1	1	1	1	1	1	1	1	1	1	1	1	1	1	1	1	1	0
26247635	c1771	sapA	1	1	1	1	1	1	1	1	1	1	1	1	1	1	1	1	1	0
26247636	c1772	ymjA	1	1	1	1	1	1	1	1	1	1	1	1	1	1	1	1	1	0
26247637	c1773	pspF	1	1	1	1	1	1	1	1	1	1	1	1	1	1	1	1	1	1
26247638	c1774	pspA	1	1	1	1	1	1	1	1	1	1	1	1	1	1	1	1	1	1
26247639	c1775	pspB	1	1	1	1	1	1	1	1	1	1	1	1	1	1	1	1	1	1
26247640	c1776	-	1	1	1	1	1	1	1	1	1	1	1	1	1	1	1	1	1	1
26247641	c1777	pspC	1	1	1	1	1	1	1	1	1	1	1	1	1	1	1	1	1	1
26247642	c1778	pspD	1	1	1	1	1	1	1	1	1	1	1	1	1	1	1	1	1	1
26247643	c1779	pspE	1	1	1	1	1	1	1	1	1	1	1	1	1	1	1	1	1	1
26247644	c1780	ycjM	1	1	1	1	0	1	1	1	1	1	1	1	1	1	1	1	1	1
26247645	c1781	-	1	1	1	1	0	1	1	1	1	1	1	1	1	1	1	1	1	0
26247646	c1782	ycjN	1	1	1	1	0	1	1	1	1	1	1	1	1	1	1	1	1	0
26247647	c1783	ycjO	1	1	1	1	0	1	1	1	1	1	1	1	1	1	1	1	1	0
26247648	c1784	ycjP	1	1	1	1	0	1	1	1	1	1	1	1	1	1	1	1	1	0
26247649	c1785	ycjQ	1	1	1	1	0	1	1	1	1	1	1	1	1	1	1	1	1	0
26247650	c1786	ycjR	1	1	1	1	0	1	1	1	1	1	1	1	1	1	1	1	1	0
26247651	c1787	ycjS	1	1	1	1	0	1	1	1	1	1	1	1	1	1	1	1	1	0
26247652	c1788	ycjT	1	1	1	1	0	1	1	1	1	1	1	1	1	1	1	1	1	0
26247653	c1789	ycjU	1	1	1	1	0	1	1	1	1	1	1	1	1	1	1	1	1	0
26247654	c1790	ycjV	1	1	1	1	0	1	1	1	1	1	1	1	1	1	1	1	1	0
26247655	c1791	ompG	1	1	1	1	0	1	1	1	1	1	1	1	1	1	1	1	1	0
26247656	c1792	ycjW	1	1	1	1	0	1	1	1	1	1	1	1	1	1	1	1	1	1
26247657	c1793	ycjX	1	1	1	1	1	1	1	1	1	1	1	1	1	1	1	1	1	1
26247658	c1794	ycjF	1	1	1	1	1	1	1	1	1	1	1	1	1	1	1	1	1	1
26247659	c1795	tyrR	1	1	1	1	1	1	1	1	1	1	1	1	1	1	1	1	1	1
26247660	c1796	tpx	1	1	1	1	1	1	1	1	1	1	1	1	1	1	1	1	1	1
26247661	c1797	ycjG	1	1	1	1	1	1	1	1	1	1	1	1	1	1	1	1	1	1
26247662	c1800	-	1	1	1	1	1	1	1	1	1	1	1	1	1	1	1	1	1	1
26247663	c1801	-	1	1	1	1	1	1	1	1	1	1	1	1	1	1	1	1	1	0
26247664	c1802	-	1	1	1	1	1	1	1	1	1	1	1	1	1	1	1	1	1	1
26247665	c1803	mppA	1	1	1	1	1	1	1	1	1	1	1	1	1	1	1	1	1	1
26247666	c1804	ynaI	1	1	1	1	1	1	1	1	1	1	1	1	1	1	1	1	1	1
26247667	c1805	ynaJ	1	1	1	1	1	1	1	1	1	1	1	1	1	1	1	1	1	1
26247668	c1806	ydaA	1	1	1	1	1	1	1	1	1	1	1	1	1	1	1	1	1	1
26247669	c1807	fnr	1	1	1	1	1	1	1	1	1	1	1	1	1	1	1	1	1	1
26247670	c1808	ogt	1	1	1	1	1	1	1	1	1	1	1	1	1	1	1	1	1	1
26247671	c1809	-	1	1	1	1	1	1	1	1	1	1	1	1	1	1	1	1	1	1
26247672	c1810	-	1	1	1	1	0	0	0	0	0	0	0	0	0	0	0	0	1	0
26247673	c1811	-	1	1	1	1	0	0	0	0	0	0	0	0	0	0	0	0	1	0
26247674	c1812	-	1	1	1	1	0	0	0	0	0	0	0	0	0	0	0	0	1	1
26247675	c1813	-	1	1	1	1	0	0	0	0	0	0	0	0	0	0	0	0	1	1
26247676	c1814	ydaL	1	1	1	1	1	1	1	1	1	1	1	1	1	1	1	1	1	1
26247677	c1815	ydaM	1	1	1	1	1	1	1	1	1	1	1	1	1	1	1	1	1	1
26247678	c1816	ydaN	1	1	1	1	1	1	1	1	1	1	1	1	1	1	1	1	1	1
26247679	c1817	dbpA	1	1	1	1	1	1	1	1	1	1	1	1	1	1	1	1	1	0
26247680	c1818	ydaO	1	1	1	1	1	1	1	1	1	1	1	1	1	1	1	1	1	1
26247681	c1819	-	1	1	1	1	1	0	0	1	0	0	1	1	0	1	1	1	0	1
26247682	c1820	-	1	1	1	1	1	0	0	0	0	0	0	1	0	0	0	0	0	1
26247683	c1821	ynaF	1	1	1	1	1	1	1	1	1	1	1	1	1	1	1	1	1	1
26247684	c1822	ompN	1	1	1	1	1	1	1	1	1	1	1	1	1	1	1	1	1	1
26247685	c1823	ydbK	1	1	1	1	1	1	1	1	1	1	1	1	1	1	1	1	1	1
26247686	c1824	-	1	1	1	1	1	1	1	1	1	1	1	1	1	1	1	1	1	1
26247687	c1825	-	1	1	1	1	1	1	1	1	1	1	1	1	1	1	1	1	1	1
26247688	c1826	hslJ	1	1	1	1	1	1	1	1	1	1	1	1	1	1	1	1	1	1
26247689	c1827	ldhA	1	1	1	1	1	1	1	1	1	1	1	1	1	1	1	1	1	1
26247690	c1828	ydbH	1	1	1	1	1	1	1	1	1	1	1	1	1	1	1	1	1	1
26247691	c1829	ynbE	1	1	1	1	1	1	1	1	1	1	1	1	1	1	1	1	1	1
26247692	c1830	ydbL	1	1	1	1	1	1	1	1	1	1	1	1	1	1	1	1	1	1
26247693	c1832	ydbC	1	1	1	1	1	1	1	1	1	1	1	0	1	1	1	1	0	0
26247694	c1833	-	1	1	1	0	1	1	1	1	1	1	1	0	1	1	1	1	1	1
26247695	c1834	ynbA	1	1	1	0	1	1	1	1	1	1	1	0	1	1	1	1	1	1
26247696	c1835	ynbB	1	1	1	0	1	1	1	1	1	1	1	1	1	1	1	1	1	1
26247697	c1836	ynbC	1	1	1	0	1	1	1	1	1	1	1	1	1	1	1	1	1	1
26247698	c1837	ynbD	1	1	1	0	1	1	1	1	1	1	1	1	1	1	1	1	1	1
26247699	c1838	-	1	1	1	1	1	1	1	1	1	1	1	1	1	1	1	1	1	1
26247700	c1839	acpD	1	1	1	1	1	1	1	1	1	1	1	1	1	1	1	1	1	1
26247701	c1840	hrpA	1	1	1	1	1	1	1	1	1	1	1	1	1	1	1	1	1	1
26247702	c1841	ydcF	1	1	1	1	1	0	1	1	1	1	1	1	1	1	1	1	1	0
26247703	c1842	aldA	1	1	1	1	1	0	1	1	1	1	1	1	1	1	1	1	1	1
26247704	c1843	-	1	1	1	1	1	0	1	1	1	1	1	1	1	1	1	1	1	1
26247705	c1844	cybB	1	1	1	1	1	0	1	1	1	1	1	1	1	1	1	1	1	1
26247706	c1845	ydcA	1	1	1	1	1	0	1	1	1	1	1	1	1	1	1	1	1	1
26247707	c1846	-	1	1	1	1	1	0	1	1	1	1	1	1	1	1	1	1	1	1
26247708	c1847	ycdI	1	1	1	1	1	0	1	1	1	1	1	1	1	1	1	1	1	1
26247709	c1848	ydcJ	1	1	1	1	1	0	1	1	1	1	1	1	1	1	1	1	1	1
26247710	c1849	ydcG	1	1	1	1	1	0	1	1	1	1	1	1	1	1	1	1	1	1
26247711	c1850	ydcH	1	1	1	1	1	0	1	1	1	1	1	1	1	1	1	1	1	1
26247712	c1851	rimL	1	1	1	1	1	0	1	1	1	1	1	1	1	1	1	1	1	1
26247713	c1852	ydcK	1	1	1	1	1	0	1	1	1	1	1	1	1	1	1	1	1	1
26247714	c1853	tehA	1	1	1	1	1	0	1	1	1	1	1	1	1	1	1	1	1	1
26247715	c1854	tehB	1	1	1	1	1	0	1	1	1	1	1	1	1	1	1	1	1	1
26247716	c1855	-	1	1	1	1	1	0	1	1	1	1	1	1	1	1	1	1	1	1
26247717	c1856	ydcL	1	1	1	1	1	0	1	1	1	1	1	1	1	1	1	1	1	1
26247718	c1857	ydcO	1	1	1	1	1	0	1	1	1	1	1	1	1	1	1	1	0	1
26247719	c1858	ydcN	1	1	1	1	1	0	1	1	1	1	1	1	1	1	1	1	0	1
26247720	c1859	ydcP	1	1	1	1	1	0	1	1	1	1	1	1	1	1	1	1	0	1
26247721	c1860	yncJ	1	1	1	1	1	0	1	1	1	1	1	1	1	1	1	1	0	1
26247722	c1861	-	1	1	1	1	1	0	1	1	1	1	1	1	1	1	1	1	0	1
26247723	c1862	-	1	1	1	1	1	0	1	1	1	1	1	1	1	1	1	1	0	1
26247724	c1863	ydcR	1	1	1	1	1	0	1	1	1	1	1	1	1	1	1	1	0	1
26247725	c1864	ydcS	1	1	1	1	1	0	1	1	1	1	1	1	1	1	1	1	0	1
26247726	c1865	ydcT	1	1	1	1	1	0	1	1	1	1	1	1	1	1	1	1	0	1
26247727	c1866	ydcU	1	1	1	1	1	0	1	1	1	1	1	1	1	1	1	1	1	1
26247728	c1867	ydcV	1	1	1	1	1	0	1	1	1	1	1	1	1	1	1	1	1	1
26247729	c1869	ydcW	1	1	1	1	1	0	1	1	1	1	1	1	1	1	1	1	1	1
26247730	c1870	-	1	1	1	1	1	0	1	1	1	1	1	1	1	1	1	1	1	1
26247731	c1871	ydc	1	1	1	1	1	0	1	1	1	1	1	1	1	1	1	1	1	1
26247732	c1872	ydcZ	1	1	1	1	1	0	1	1	1	1	1	1	1	1	1	1	1	1
26247733	c1873	yncA	1	1	1	1	1	1	1	1	1	1	1	1	1	1	1	1	1	1
26247734	c1874	-	1	1	1	1	1	1	1	1	1	1	1	1	1	1	1	1	1	0
26247735	c1877	yncE	1	1	1	1	1	1	1	1	1	1	1	1	1	1	1	1	0	0
26247736	c1878	ansP	1	1	1	1	1	1	1	1	1	1	1	1	1	1	1	1	0	0
26247737	c1879	-	1	1	1	0	1	1	1	1	1	1	1	1	1	1	1	1	0	0
26247738	c1880	-	1	1	1	0	1	1	1	1	1	1	1	1	1	1	1	1	0	0
26247739	c1881	-	1	1	1	0	1	0	0	0	0	0	0	0	0	0	0	0	0	0
26247740	c1882	-	1	1	1	0	1	0	0	0	0	0	0	0	0	0	0	0	0	0
26247741	c1883	-	1	1	1	1	0	0	0	0	0	1	0	0	0	0	0	0	0	0
26247742	c1884	-	0	0	0	0	0	0	0	0	1	0	0	0	0	0	0	0	0	0
26247743	c1885	-	0	0	0	0	0	0	0	0	0	0	0	0	0	0	0	0	0	0
26247744	c1886	-	0	0	0	0	0	0	0	0	0	0	0	0	0	0	0	0	0	0
26247745	c1887	-	1	1	1	0	1	0	0	0	0	0	0	0	0	0	0	0	0	0
26247746	c1888	-	1	1	1	1	1	0	0	0	0	0	0	1	0	0	0	0	0	0
26247747	c1889	-	1	1	1	0	0	0	0	0	0	0	0	0	0	0	0	0	0	0
26247748	c1890	-	0	0	1	0	0	0	0	0	0	0	0	0	0	0	0	0	0	0
26247749	c1891	-	1	1	1	0	1	0	0	0	0	0	0	0	0	0	0	0	0	0
26247750	c1892	-	1	1	1	0	1	0	0	0	0	0	0	0	0	0	0	0	0	0
26247751	c1893	-	1	1	1	0	0	0	0	0	0	0	0	1	0	1	0	0	0	0
26247752	c1894	yddH	1	1	1	1	1	1	1	1	1	1	1	1	1	1	1	1	0	0
26247753	c1895	nhoA	1	1	1	1	1	1	1	1	1	1	1	1	1	1	1	1	0	1
26247754	c1896	yddE	1	1	1	1	1	1	1	1	1	1	1	1	1	1	1	1	0	1
26247755	c1897	narV	1	1	1	1	1	1	1	1	1	1	1	1	1	1	1	1	0	1
26247756	c1898	narW	1	1	1	1	1	1	1	1	1	1	1	1	1	1	1	1	0	1
26247757	c1899	narY	1	1	1	1	1	1	1	1	1	1	1	1	1	1	1	1	0	1
26247758	c1900	narZ	1	1	1	1	1	1	1	1	1	1	1	1	1	1	1	1	0	0
26247759	c1901	narU	1	1	1	1	1	1	1	1	1	1	1	1	1	1	1	1	1	0
26247760	c1902	yddG	1	1	1	1	1	1	1	1	1	1	1	1	1	1	1	1	1	1
26247761	c5623	fdnG	1	1	1	1	1	1	1	1	1	1	1	1	1	1	1	1	1	1
26247762	c1905	-	1	1	1	1	1	1	1	1	1	1	1	1	1	1	1	1	1	1
26247763	c1906	fdnH	1	1	1	1	1	1	1	1	1	1	1	1	1	1	1	1	1	1
26247764	c1907	fdnI	1	1	1	1	1	1	1	1	1	1	1	1	1	1	1	1	1	1
26247765	c1908	-	1	1	1	1	1	1	1	1	1	1	1	1	1	1	1	1	1	1
26247766	c1909	yddM	1	1	1	1	1	1	1	1	1	1	1	1	1	1	1	1	1	1
26247767	c1910	-	1	1	1	1	1	0	0	0	0	0	0	0	0	0	0	0	0	0
26247768	c1911	adhP	1	1	1	1	1	1	1	1	1	1	1	0	1	1	1	1	1	1
26247769	c1912	sfcA	1	1	1	1	1	1	1	1	1	1	1	1	1	1	1	1	1	1
26247770	c1913	rpsV	1	1	1	1	1	1	1	1	1	1	1	1	1	1	1	1	0	1
26247771	c1914	-	1	1	1	1	1	1	1	1	1	1	1	1	1	1	1	1	0	0
26247772	c1915	-	1	1	1	1	1	1	1	1	1	1	1	1	1	1	1	1	1	0
26247773	c1916	osmC	1	1	1	1	1	1	1	1	1	1	1	1	1	1	1	1	1	1
26247774	c1918	-	1	1	1	1	1	1	1	1	1	1	1	1	1	1	1	1	0	0
26247775	c1919	-	1	1	1	1	1	1	1	1	1	1	1	1	1	1	1	1	0	0
26247776	c1920	yddW	1	1	1	1	1	1	1	1	1	1	1	1	1	1	1	1	1	1
26247777	c1921	xasA	1	1	1	1	1	1	1	1	1	1	1	1	1	1	1	1	1	1
26247778	c1922	gadB	1	1	1	1	1	1	1	1	0	1	1	1	1	1	1	1	1	1
26247779	c1923	pqqL	1	1	1	1	1	1	1	1	1	1	1	1	1	1	1	1	1	0
26247780	c1924	yddB	1	1	1	1	1	1	1	1	1	1	1	1	1	1	1	1	1	0
26247781	c1925	yddA	1	1	1	1	1	1	1	1	1	1	1	1	1	1	1	1	1	0
26247782	c1926	ydeM	1	1	1	1	1	1	1	1	1	1	1	1	1	1	1	1	1	0
26247783	c1927	ydeN	1	1	1	1	1	1	1	1	1	1	1	1	1	1	1	1	1	0
26247784	c1928	ydeO	1	1	1	1	1	1	1	1	1	1	1	1	1	1	1	1	1	0
26247785	c1929	-	1	1	1	1	1	1	1	1	1	1	1	1	1	1	1	1	1	0
26247786	c1930	ydeP	1	1	1	1	1	1	1	1	1	1	1	1	1	1	1	1	1	0
26247787	c1931	ydeQ	1	0	1	1	1	1	1	1	1	1	1	1	1	1	1	1	1	0
26247788	c1932	ydeR	1	0	0	1	1	1	1	1	1	1	1	0	1	1	1	1	0	0
26247789	c1933	ydeS	1	1	0	1	1	1	1	1	1	1	1	0	1	1	1	1	0	0
26247790	c1934	-	1	0	0	1	1	1	1	1	1	1	1	0	0	0	1	1	0	0
26247791	c1935	-	1	0	1	1	1	1	1	1	1	1	1	1	0	0	1	1	0	0
26247792	c1936	-	1	0	1	1	1	1	0	1	1	1	1	0	0	0	1	1	0	0
26247793	c1937	-	1	0	1	1	0	0	0	0	0	0	0	0	0	0	0	0	0	0
26247794	c1938	oprR	1	1	0	0	0	0	0	0	0	0	0	0	0	0	0	0	0	0
26247795	c1939	-	1	1	1	0	0	0	0	0	0	0	0	0	0	0	0	0	0	0
26247796	c1940	hipA	1	1	1	1	1	1	1	1	1	1	1	1	1	1	0	1	0	1
26247797	c1941	hipB	1	1	1	1	0	1	1	1	1	1	1	1	1	1	0	0	0	1
26247798	c1942	tam	1	1	1	1	1	1	1	1	1	1	1	0	1	1	1	1	1	1
26247799	c1943	yneE	1	1	1	1	1	1	1	1	1	1	1	1	1	1	1	1	1	1
26247800	c1945	yneF	1	1	1	1	1	1	1	1	1	1	1	1	1	1	1	1	1	1
26247801	c1946	yneG	1	1	1	1	1	1	1	1	1	1	1	1	1	1	1	1	1	1
26247802	c1947	yneH	1	1	1	1	1	1	1	1	1	1	1	1	1	1	1	1	1	1
26247803	c1948	yneI	1	1	1	1	1	1	1	1	1	1	1	1	1	1	1	1	1	1
26247804	c1949	yneJ	1	1	1	1	1	1	1	1	1	1	1	1	1	1	1	1	0	1
26247805	c1950	sotB	1	1	1	1	1	1	1	1	1	1	1	1	1	1	1	1	1	1
26247806	c1951	marC	1	1	1	1	1	1	1	1	1	1	1	1	1	1	1	1	1	1
26247807	c1952	marR	1	1	1	1	1	1	1	1	1	1	1	1	1	1	1	1	1	1
26247808	c1953	marA	1	1	1	1	1	1	1	1	1	1	1	1	1	1	1	1	1	1
26247809	c1954	marB	1	1	1	1	1	1	1	1	1	1	1	1	1	1	1	1	1	1
26247810	c1955	-	1	1	1	0	0	1	1	1	1	1	1	1	1	0	0	0	0	0
26247811	c1956	-	0	0	1	0	0	1	1	1	1	1	1	0	1	0	0	0	0	0
26247812	c1957	-	0	0	1	0	0	1	1	1	1	1	1	0	1	0	0	0	0	0
26247813	c1958	-	0	0	1	0	0	1	1	1	1	1	1	0	1	0	0	0	0	0
26247814	c1959	-	0	0	1	0	0	0	1	1	1	1	1	0	1	0	0	0	0	0
26247815	c1960	-	1	1	1	0	0	1	1	1	1	1	1	0	1	0	0	0	0	0
26247816	c1961	ydeD	1	1	1	1	1	1	1	1	1	1	1	0	1	1	1	1	1	1
26247817	c1962	ydeF	1	1	1	1	1	1	1	1	1	1	1	0	1	1	1	1	1	1
26247818	c1963	ydeH	1	1	1	1	1	1	1	1	1	1	1	1	1	1	1	1	0	1
26247819	c1964	dcp	1	1	1	1	1	1	1	1	1	1	1	1	1	1	1	1	1	1
26247820	c1965	ydfG	1	1	1	1	1	1	1	1	1	1	1	1	1	1	1	1	1	1
26247821	c1966	ydfH	1	1	1	1	1	1	1	1	1	1	1	1	1	1	1	1	1	1
26247822	c1967	ydfZ	1	1	1	1	1	1	1	1	1	1	1	1	1	1	1	1	1	1
26247823	c1968	-	1	1	1	1	1	1	1	1	1	1	1	1	1	1	1	1	1	1
26247824	c1969	ydfJ	1	1	0	1	1	1	1	1	1	1	1	0	1	1	1	1	1	1
26247825	c1970	rspB	1	1	1	1	1	1	1	1	1	1	1	0	1	1	0	0	0	1
26247826	c1971	rspA	1	1	1	1	1	1	1	1	1	1	1	0	1	1	1	1	1	1
26247827	c1972	ynfA	1	1	1	1	1	1	1	1	1	1	1	0	1	1	1	1	1	1
26247828	c1973	ynfB	1	1	1	1	1	1	1	1	1	1	1	0	1	1	1	1	1	1
26247829	c1974	speG	1	1	1	1	1	1	1	1	1	1	1	0	1	1	1	1	1	1
26247830	c1975	ynfC	1	1	1	1	1	1	1	1	1	1	1	0	1	1	1	1	1	1
26247831	c1976	ynfD	1	1	1	1	1	1	1	1	1	1	1	0	1	1	1	1	1	1
26247832	c1977	ynfE	0	0	1	1	1	1	1	1	1	1	1	1	1	1	1	1	0	1
26247833	c1978	ynfF	0	0	1	1	1	1	1	1	1	1	1	1	1	1	1	1	1	1
26247834	c1979	ynfG	0	0	1	1	1	1	1	1	1	1	1	1	1	1	1	1	1	1
26247835	c1980	-	0	0	1	1	1	1	1	1	1	1	1	1	1	1	1	1	1	1
26247836	c1981	ynfH	0	0	1	1	1	1	1	1	1	1	1	1	1	1	1	1	1	1
26247837	c1982	ynfI	1	1	1	1	1	1	1	1	1	1	1	1	1	1	1	1	1	1
26247838	c1983	ynfJ	1	1	1	1	1	1	1	1	1	1	1	1	1	1	1	1	1	1
26247839	c1984	bioD	1	1	1	1	1	1	1	1	1	1	1	1	1	1	1	1	1	1
26247840	c1985	mlc	1	1	1	1	1	1	1	1	1	1	1	1	1	1	1	1	1	1
26247841	c1986	ynfL	1	1	1	1	1	1	1	1	1	1	1	1	1	1	1	1	1	1
26247842	c1987	ynfM	1	1	1	1	1	1	1	1	1	1	1	1	1	1	1	1	1	1
26247843	c1988	asr	1	1	1	1	1	1	1	1	1	1	1	1	1	1	1	1	1	1
26247844	c1989	-	1	1	1	1	1	1	1	1	1	1	1	1	1	1	1	1	1	1
26247845	c1990	-	1	1	1	1	1	1	1	1	1	1	1	1	1	1	1	1	1	1
26247846	c1991	ydgE	1	1	1	1	1	1	1	1	1	1	1	1	1	1	1	1	1	1
26247847	c1992	ydgF	1	1	1	1	1	1	1	1	1	1	1	1	1	1	1	1	1	1
26247848	c1993	-	1	1	1	1	1	1	1	1	1	1	1	1	1	1	1	1	1	1
26247849	c1994	pntB	1	1	1	1	1	1	1	1	1	1	1	1	1	1	1	1	1	1
26247850	c1995	pntA	1	1	1	1	1	1	1	1	1	1	1	1	1	1	1	1	1	1
26247851	c1996	ydgH	1	1	1	1	1	1	1	1	1	1	1	1	1	1	1	1	1	1
26247852	c1997	ydgI	1	1	1	1	1	1	1	1	1	1	1	1	1	1	1	1	1	1
26247853	c1998	ydgB	1	1	1	1	1	1	1	1	1	1	1	1	1	1	1	1	1	1
26247854	c1999	ydgC	1	1	1	1	1	1	1	1	1	1	1	1	1	1	1	1	1	1
26247855	c2000	rstA	1	1	1	1	1	1	1	1	1	1	1	1	1	1	1	1	1	1
26247856	c2001	rstB	1	1	1	1	1	1	1	1	1	1	1	1	1	1	1	1	1	1
26247857	c2002	tus	1	1	1	1	1	1	1	1	1	1	1	1	1	1	1	1	1	1
26247858	c2003	fumC	1	1	1	1	1	1	1	1	1	1	1	1	1	1	1	1	1	1
26247859	c2004	fumA	1	1	1	1	1	1	1	1	1	1	1	1	1	1	1	1	1	1
26247860	c2005	manA	1	1	1	1	1	1	1	1	1	1	1	1	1	1	1	1	1	1
26247861	c2006	ydgA	1	1	1	1	1	1	1	1	1	1	1	1	1	1	1	1	1	1
26247862	c2007	uidC	1	1	1	1	1	1	1	1	1	1	1	1	1	1	1	1	1	1
26247863	c2008	uidB	1	1	1	1	1	1	1	1	1	1	1	1	1	1	1	1	1	1
26247864	c2009	uidA	1	1	1	1	1	1	1	1	1	1	1	1	1	1	1	1	1	1
26247865	c2010	uidR	1	1	1	1	1	1	1	1	1	1	1	1	1	1	1	1	1	1
26247866	c2011	hdhA	1	1	1	1	1	1	1	1	1	1	1	1	1	1	1	1	1	1
26247867	c2012	malI	1	1	1	1	1	1	1	1	1	1	1	1	1	1	1	1	1	1
26247868	c2013	malX	1	1	1	1	1	1	1	1	1	1	1	1	1	1	1	1	1	1
26247869	c2014	malY	1	1	1	1	1	1	1	1	1	1	1	1	1	1	1	1	1	1
26247870	c2015	add	1	1	1	1	1	1	1	1	1	1	1	1	1	1	1	1	1	1
26247871	c2016	ydgJ	1	1	1	1	1	1	1	1	1	1	1	1	1	1	1	1	1	1
26247872	c2017	ydgT	1	1	1	1	1	1	1	1	1	1	1	1	1	1	1	1	1	1
26247873	c2018	ydgK	1	1	1	1	1	1	1	1	1	1	1	1	1	1	1	1	1	1
26247874	c2019	-	1	1	1	1	1	1	1	1	1	1	1	1	1	1	1	1	1	1
26247875	c2020	-	1	1	1	1	1	1	1	1	1	1	1	1	1	1	1	1	1	1
26247876	c2021	-	1	1	1	1	1	1	1	1	1	1	1	1	1	1	1	1	1	1
26247877	c2022	rnfD	1	1	1	1	1	1	1	1	1	1	1	1	1	1	1	1	1	1
26247878	c2023	-	1	1	1	1	1	1	1	1	1	1	1	1	1	1	1	1	1	1
26247879	c2024	ydgQ	1	1	1	1	1	1	1	1	1	1	1	1	1	1	1	1	1	1
26247880	c2025	nth	1	1	1	1	1	1	1	1	1	1	1	1	1	1	1	1	1	1
26247881	c2026	ydgR	1	1	1	1	1	1	1	1	1	1	1	1	1	1	1	1	1	1
26247882	c2027	gst	1	1	1	1	1	1	1	1	1	1	1	1	1	1	1	1	1	1
26247883	c2028	pdxY	1	1	1	1	1	1	1	1	1	1	1	1	1	1	1	1	1	1
26247884	c2029	tyrS	1	1	1	1	1	1	1	1	1	1	1	1	1	1	1	1	1	1
26247885	c2030	pdxH	1	1	1	1	1	1	1	1	1	1	1	1	1	1	1	1	1	1
26247886	c2031	ydhA	1	1	1	1	1	1	1	1	1	1	1	1	1	1	1	1	1	1
26247887	c2032	ydhH	1	1	1	1	1	1	1	1	1	1	1	1	1	1	1	1	1	1
26247888	c2033	slyB	1	1	1	1	1	1	1	1	1	1	1	1	1	1	1	1	1	1
26247889	c2034	slyA	1	1	1	1	1	1	1	1	1	1	1	1	1	1	1	1	1	1
26247890	c2035	ydhI	1	1	1	1	1	1	1	1	1	1	1	1	1	1	1	1	1	1
26247891	c2036	ydhJ	1	1	1	1	1	1	1	1	1	0	1	1	1	1	1	1	1	1
26247892	c2037	ydhK	1	1	1	1	1	1	1	1	1	1	1	1	1	1	1	1	1	1
26247893	c2038	sodC	1	1	1	1	1	1	1	1	1	1	1	1	1	1	1	1	1	1
26247894	c2039	ydhF	1	1	1	1	1	1	1	1	1	1	1	1	1	1	1	1	1	1
26247895	c2040	ydhL	1	1	1	1	1	1	1	1	1	1	1	1	1	1	1	1	1	1
26247896	c2041	-	1	1	1	1	1	1	1	1	1	1	1	1	1	1	1	1	1	1
26247897	c2042	ydhM	1	1	1	1	1	1	1	1	1	1	1	1	1	1	1	1	1	1
26247898	c2043	nemA	1	1	1	1	1	1	1	1	1	1	1	1	1	1	1	1	1	1
26247899	c2044	gloA	1	1	1	1	1	1	1	1	1	1	1	1	1	1	1	1	1	1
26247900	c2045	rnt	1	1	1	1	1	1	1	1	1	1	1	1	1	1	1	1	1	1
26247901	c2046	-	1	1	1	1	1	1	1	1	1	1	1	1	1	1	1	1	1	1
26247902	c2047	-	1	1	1	1	1	1	1	1	1	1	1	1	1	1	1	1	1	1
26247903	c2048	ydhD	1	1	1	1	1	1	1	1	1	1	1	1	1	1	1	1	1	1
26247904	c2049	ydhO	1	1	1	1	1	1	1	1	1	1	1	1	1	1	1	1	1	1
26247905	c2050	sodB	1	1	1	1	1	1	1	1	1	1	1	1	1	1	1	1	1	1
26247906	c2051	ydhP	1	1	1	1	1	1	1	1	1	1	1	1	1	1	1	1	1	1
26247907	c2052	purR	1	1	1	1	1	1	1	1	1	1	1	1	1	1	1	1	1	1
26247908	c2053	ydhB	1	1	1	1	1	1	1	1	1	1	1	1	1	1	1	1	1	1
26247909	c2054	ydhC	1	1	1	1	1	1	1	1	1	1	1	1	1	1	1	1	1	1
26247910	c2055	cfa	1	1	1	1	1	1	1	1	1	1	1	1	1	1	1	1	1	1
26247911	c2056	ribE	1	1	1	1	1	1	1	1	1	1	1	1	1	1	1	1	1	1
26247912	c2057	ydhE	1	1	1	1	1	1	1	1	1	1	1	1	1	1	1	1	1	1
26247913	c2058	ydhQ	1	1	1	1	1	1	1	1	1	1	1	1	1	1	1	1	1	1
26247914	c2059	-	1	1	1	1	1	0	1	1	1	1	1	1	1	1	1	1	1	1
26247915	c2060	ydhS	1	1	1	1	1	1	1	1	1	1	1	1	1	1	1	1	1	1
26247916	c2061	-	1	1	1	1	1	1	1	1	1	1	1	1	1	1	1	1	1	1
[truncated: 3,381 more rows]

## Sheet: Supplementary Table 2
GI number	c number	GenBank Annotation	Genes specific to UPEC according to Lloyd	Escherichia coli F11	Escherichia coli 536	Escherichia coli UTI89	Escherichia coli E2348	Eschericia coli O42	Escherichia coli B171	Escherichia coli E24377A	Escherichia coli E22	Escherichia coli B7A	Escherichia coli E110019	Escherichia coli 53638	Shigella sonnei 53G	Escherichia coli HS	Escherichia coli K12 MG1655	Escherichia coli O157H7	Escherichia coli O157H7 EDL933	Shigella flexneri 2a str. 201	Shigella dysenteriae Sd197	Number of strains inferred to contain this gene, other than CFT073	Conserved Domains (NCBI) Accession / PSSM-Id	Conserved Domain Summary
26246222	c0317	hypothetical protein c0317		0	0	0	0	0	0	0	0	0	0	0	0	0	0	0	0	0	0	0	cl01302	Prophage CP4-57 regulatory protein (AlpA)
26246223	c0318	hypothetical protein c0318		0	0	0	0	0	0	0	0	0	0	0	0	0	0	0	0	0	0	0	cl00485	Ribose/Galactose Isomerase
26246224	c0319	Putative oligogalacturonide lyase		0	0	0	0	0	0	0	0	0	0	0	0	0	0	0	0	0	0	0	31165	Periplasmic component of the Tol biopolymer transport system [Intracellular trafficking and secretion]
26246225	c0320	hypothetical protein c0320		0	0	0	0	0	0	0	0	0	0	0	0	0	0	0	0	0	0	0	-	-
26246226	c0321	gluconate 5-dehydrogenase		0	0	0	0	0	0	0	0	0	0	0	0	0	0	0	0	0	0	0	cl09931	S-adenosyl-L-homocysteine hydrolase (AdoHycase)
26246227	c0322	Putative oligogalacturonide transporter		0	0	0	0	0	0	0	0	0	0	0	0	0	0	0	0	0	0	0	cl09119	Sugar (and other) transporter
26246228	c0323	Putative exopolygalacturonate lyase		0	0	0	0	0	0	0	0	0	0	0	0	0	0	0	0	0	0	0	-	-
26246235	c0330	Putative deoxyribose operon repressor		1	1	0	0	1	0	0	0	0	0	0	0	0	0	0	0	0	0	3	PRD10681	DeoR
26246236	c0331	Putative ribokinase		1	1	0	0	1	0	0	0	0	0	0	0	0	0	0	0	0	0	3	cd01174	Ribokinase
26246237	c0332	Putative L-fucose permease		1	1	0	0	1	0	0	0	0	0	0	0	0	0	0	0	0	0	3	COG0738	FucP Fucose Permease
26246238	c0333	Putative cytoplasmic protein		1	1	0	0	1	0	0	0	0	0	0	0	0	0	0	0	0	0	3	-	-
26246307	c0409	Putative oxidoreductase		1	1	1	1	1	0	0	0	0	0	0	0	0	0	1	1	0	0	7	cd04735	Old yellow enzyme (OYE)-related FMN binding domain, group 4
26246308	c0410	Hypothetical protein ycjY		1	1	1	1	1	0	0	0	0	0	0	0	0	0	1	1	0	0	7	cl09107	Esterase / lipase
26246309	c0411	Putative LysR-like transcriptional regulator		1	1	1	1	1	0	0	0	0	0	0	0	0	0	1	1	0	0	7	COG0583	--
26246310	c0412	Hypothetical transcriptional regulator ycjZ		1	1	1	1	1	0	0	0	0	0	0	0	0	0	0	0	0	0	5	COG0583	--
26246311	c0413	Putative aldo/keto reductase		1	1	1	1	1	0	0	0	0	0	0	0	0	0	0	0	0	0	5	cl00470	--
26246312	c0414	2,5-diketo-D-gluconic acid reductase A		1	1	1	1	1	1	1	1	0	0	1	0	1	0	1	1	0	0	12	cl00470	--
26246313	c0415	Putative adhesin		1	1	1	1	1	1	1	1	1	1	1	0	1	0	1	1	0	0	14	-	-
26246647	c0757	hypothetical protein c0757		1	1	1	1	0	0	0	0	0	0	0	0	0	0	0	0	0	0	4	cl09110	Anion permease ArsB/NhaD - shown to translocate sodium, arsenate, antimonite, sulfate and organic anions
26246648	c0758	hypothetical protein	1	1	1	1	1	0	0	0	0	0	0	0	0	0	0	0	0	0	0	4	cl01047	-
26246649	c0759	hypothetical protein		1	1	1	1	0	0	0	0	0	0	0	0	0	0	0	0	0	0	4	cl01922	Sialidase, Sialidases or neuraminidases
26246650	c0760	Hypothetical protein ygdQ		1	1	0	1	0	0	0	0	0	0	0	0	0	0	0	0	0	0	3	cl00543	TerC, Integral membrane protein TerC family
26246651	c0761	Putative dihydrodipicolinate synthase	1	1	1	1	1	0	0	0	0	0	0	0	0	0	0	0	0	0	0	4	cd00408	-
26246652	c0762	Putative alcohol dehydrogenase		1	1	1	1	0	0	0	0	0	0	0	0	0	0	0	0	0	0	4	cl02872	3-dehydroquinate synthase
26246653	c0763	Putative inner membrane protein	1	1	1	1	1	0	0	0	0	0	0	0	0	0	0	0	0	0	0	4	cl01345	-
26246654	c0764	Putative pyridoxine phosphate biosynthetic protein		1	1	1	1	0	0	0	0	0	0	0	0	0	0	0	0	0	0	4	cl00873	Pyridoxal phosphate biosynthetic protein PdxA
26246655	c0765	Putative transcriptional regulator	1	1	1	1	1	0	0	0	0	0	0	0	0	0	0	0	0	0	0	4	COG1349	GlpR
26247810	c1955	6-phospho-beta-glucosidase bglA		1	1	1	0	0	1	1	1	1	1	1	1	1	0	0	0	0	0	11	cl01046	Glycosyl hydrolase family 1
26247811	c1956	Putative outer membrane protein yieC precursor		0	0	1	0	0	1	1	1	1	1	1	0	1	0	0	0	0	0	8	cd01346	Maltoporin-like channels (LamB porin)
26247812	c1957	PTS system, cellobiose-specific IIA component		0	0	1	0	0	1	1	1	1	1	1	0	1	0	0	0	0	0	8	cd00215	--
26247813	c1958	Putative conserved protein		0	0	1	0	0	1	1	1	1	1	1	0	1	0	0	0	0	0	8	cl00557	PtsG, Phosphotransferase system IIC components
26247814	c1959	PTS system, cellobiose-specific IIB component		0	0	1	0	0	0	1	1	1	1	1	0	1	0	0	0	0	0	7	cd05564	PTS_IIB_chitobiose_lichenan
26247815	c1960	Putative conserved protein		1	1	1	0	0	1	1	1	1	1	1	0	1	0	0	0	0	0	10	COG2188	PhnF, Transcriptional regulators [Transcription]
26249240	c3405	2-hydroxyacid dehydrogenase	1	1	1	1	1	0	0	0	0	0	0	0	0	0	0	0	0	0	0	4	cl09931	S-adenosyl-L-homocysteine hydrolase (AdoHycase)
26249241	c3406	Phosphosugar isomerase		1	1	1	1	0	0	0	0	0	0	0	0	0	0	0	0	0	0	4	cd05014	KpsF is an arabinose-5-phosphate isomerase which contains SIS
26249242	c3407	Beta-cystathionase		1	1	1	1	0	0	0	0	0	0	0	0	0	0	0	0	0	0	4	cd00609	Aspartate aminotransferase family
26249243	c3408	PTS system, maltose and glucose-specific IIABC component	1	1	1	1	1	0	0	0	0	0	0	0	0	0	0	0	0	0	0	4	cd00212	PTS system, glucose/sucrose specific IIB subunit
26249244	c3409	Antiterminator		1	1	1	1	0	0	0	0	0	0	0	0	0	0	0	0	0	0	4	pfam00874	PRD domain
26249245	c3410	hypothetical protein c3410		1	1	1	1	0	0	0	0	0	0	0	0	0	0	0	0	0	0	4	-	-
26249581	c3750	Putative regulator	1	1	1	1	1	0	0	0	0	0	0	0	0	0	0	0	0	0	0	4	COG2186	FadR, Transcriptional regulators
26249582	c3751	Hypothetical oxidoreductase ydfI		1	1	1	1	0	0	0	0	0	0	0	0	0	0	0	0	0	0	4	COG0246	MtlD, Mannitol-1-phosphate/altronate dehydrogenases
26249583	c3752	Hypothetical zinc-type alcohol dehydrogenase-like protein yjjN		1	1	1	1	0	0	0	0	0	0	0	0	0	0	0	0	0	0	4	COG1063	Tdh, Threonine dehydrogenase and related Zn-dependent dehydrogenases
26249584	c3753	Ureidoglycolate dehydrogenase	1	1	1	1	1	0	0	0	0	0	0	0	0	0	0	0	0	0	0	4	cl00900	Ldh_2, Malate/L-lactate dehydrogenase
26249585	c3754	Putative c4-dicarboxylate transport system binding protein		1	1	1	1	0	0	0	0	0	0	0	0	0	0	0	0	0	0	4	cl00710	SBP_bac_7, Bacterial extracellular solute-binding protein, family 7
26249586	c3755	hypothetical protein c3755	1	1	1	1	1	0	0	0	0	0	0	0	0	0	0	0	0	0	0	4	cl01181	DctQ, Tripartite ATP-independent periplasmic transporters, DctQ component.
26249587	c3756	c4-dicarboxylate permease	1	1	1	1	1	0	0	0	0	0	0	0	0	0	0	0	0	0	0	4	cl09110	ArsB_NhaD_permease, Anion permease ArsB/NhaD
26249839	c4013	hypothetical protein c4013		1	1	1	0	0	0	0	0	0	0	0	0	0	0	0	0	0	0	3	-	-
26249840	c4014	hypothetical protein c4014		1	1	1	0	0	0	0	0	0	0	0	0	0	0	0	0	0	0	3	cd01166	KdgK, 2-keto-3-deoxygluconate kinase
26249841	c4015	Ribose transport system permease protein rbsC		1	1	1	0	0	0	0	0	0	0	0	0	0	0	0	0	0	0	3	cl00454	BPD_transp_2, Branched-chain amino acid transport system / permease component
26249842	c4016	Ribose transport ATP-binding protein rbsA	1	1	1	1	0	0	0	0	0	0	0	0	0	0	0	0	0	0	0	3	COG1129	MglA, ABC-type sugar transport system, ATPase component
26249843	c4017	Putative ribose ABC transporter	1	1	1	1	0	0	0	0	0	0	0	0	0	0	0	0	0	0	0	3	COG1879	RbsB, ABC-type sugar transport system, periplasmic component
26249844	c4018	Tagatose-bisphosphate aldolase gatY	1	1	1	1	0	0	0	0	0	0	0	0	0	0	0	0	0	0	0	3	cd00947	TBP_aldolase_IIB, Tagatose-1,6-bisphosphate (TBP) aldolase and related Type B Class II aldolases
26250098	c4276	Putative regulator		0	0	1	0	1	1	0	1	0	0	1	0	0	0	1	1	0	1	8	COG2188	PhnF, Transcriptional regulators
26250099	c4277	Putative phosphotransferase system enzyme subunit		0	0	1	0	1	1	0	1	0	0	1	0	0	0	1	1	0	1	8	cd00211	PTS system, fructose/mannitol specific IIA subunit
26250100	c4278	Putative phosphotransferase system enzyme subunit		0	0	1	0	1	1	0	1	0	0	1	0	0	0	1	1		1	8	cd05566	subunit IIB of enzyme II (EII) of the galactitol-specific phosphoenolpyruvate:carbohydrate phosphotransferase system (PTS)
26250101	c4279	PTS system, galactitol-specific IIC component		0	0	1	0	1	1	0	1	0	0	1	0	0	0	1	1	0	0	7	cl01540	PTS system Galactitol-specific IIC component
26250102	c4280	Putative xylulose kinase		0	0	1	0	1	1	0	1	0	0	1	0	0	0	1	1	0	0	7	pfam00370	FGGY family of carbohydrate kinases
26250303	c4481	C	1	1	1	1	1	0	0	0	0	0	0	0	0	0	0	0	0	0	1	5	cl01576	-
26250304	c4482	Hypothetical protein yajF	1	1	1	1	1	0	0	0	0	0	0	0	0	0	0	0	0	0	0	4	COG1940	NagC, Transcriptional regulator/sugar kinase
26250305	c4483	Putative aldolase	1	1	1	1	1	0	0	0	0	0	0	0	0	0	0	0	0	0	1	5	cd00947	Tagatose-1,6-bisphosphate (TBP) aldolase and related Type B Class II aldolases
26250306	c4484	Putative aldolase	1	1	1	1	1	0	0	0	0	0	0	0	0	0	0	0	0	0	1	5	cd00947	Tagatose-1,6-bisphosphate (TBP) aldolase and related Type B Class II aldolases
26250307	c4485	Putative PTS enzyme-ii fructose	1	1	1	1	1	0	0	0	0	0	0	0	0	0	0	0	0	0	0	4	cl00557	PtsG, Phosphotransferase system IIC components
26250308	c4486	PTS system, fructose-like-2 IIB component 1		1	1	1	1	0	0	0	0	0	0	0	0	0	0	0	0	0	0	4	cd05569	PTS_IIB_fructose: subunit IIB of enzyme II (EII)
26250309	c4487	Putative phosphotransferase system (PTS), fructose-specific	1	1	1	1	1	0	0	0	0	0	0	0	0	0	0	0	0	0	0	4	cd00211	PTS system, fructose/mannitol specific IIA subunit
26250310	c4488	Putative transcriptional Antiterminator	1	1	1	1	1	0	0	0	0	0	0	0	0	0	0	0	0	0	0	4	cd05568	PTS_IIB_bgl_like: the PTS (phosphotransferase system) IIB domain
26250575	c4756	hypothetical protein c4756		1	1	1	0	0	0	0	0	0	0	0	0	0	0	0	0	0	0	3	-	-
26250576	c4757	hypothetical protein c4757	1	1	1	1	1	0	0	0	0	0	0	0	0	0	0	0	0	0	0	4	cd05005	Hexulose-6-phosphate isomerase (PHI)
26250577	c4758	PTS system, glucose-specific IIBC component	1	1	1	1	1	0	0	0	0	0	0	0	0	0	0	0	0	0	0	4	cl00557	PtsG, Phosphotransferase system IIC components, IIB? Both?
26250578	c4759	Transketolase 1	1	1	1	1	1	0	0	0	0	0	0	0	0	0	0	0	0	0	0	4	cd02012	--
26250579	c4760	hypothetical protein c4760	1	1	1	1	1	0	0	0	0	0	0	0	0	0	0	0	0	0	0	4	COG1737	RpiR, Transcriptional regulators
26250580	c4761	Putative conserved protein	1	1	1	1	1	0	0	0	0	0	0	0	0	0	0	0	0	0	0	4	cl00115	PBPb, Bacterial periplasmic transport systems
26250581	c4762	Putative permease	1	1	1	1	1	0	0	0	0	0	0	0	0	0	0	0	0	0	0	4	cl00456	SSF, Sodium:solute symporter family
26250582	c4763	hypothetical protein c4763	1	1	1	1	1	0	0	0	0	0	0	0	0	0	0	0	0	0	0	4	cl03207	Amidase
26250583	c4764	Carbamate kinase-like protein yahI	1	1	1	1	1	0	0	0	0	0	0	0	0	0	0	0	0	0	0	4	cd04235	Carbamate kinase (CK)
26250584	c4765	Hypothetical protein yahG	1	1	1	1	1	0	0	0	0	0	0	0	0	0	0	0	0	0	0	4	pfam06545	-
26250585	c4766	hypothetical protein c4766	1	1	1	1	1	0	0	0	0	0	0	0	0	0	0	0	0	0	0	4	-	-
26250586	c4767	Hypothetical protein yahF	1	1	1	1	1	0	0	0	0	0	0	0	0	0	0	0	0	0	0	4	PRK06091	membrane protein FdrA
26250587	c4768	hypothetical protein c4768	1	1	1	1	1	0	0	0	0	0	0	0	0	0	0	0	0	0	0	4	-	-
26250588	c4769	hypothetical protein c4769		1	1	1	1	0	0	0	0	0	0	0	0	0	0	0	0	0	0	4	cd00431	Cysteine hydrolases
26250589	c4770	hypothetical protein c4770		1	1	1	1	0	0	0	0	0	0	0	0	0	0	0	0	0	0	4	-	-
26250590	c4771	Putative carboxymethylenebutenolidase		1	1	1	1	1	0	1	1	1	1	0	1	1	1	1	1	1	1	16	cl09107	Esterase_lipase
26250591	c4772	hypothetical protein c4772		1	1	1	1	1	0	1	1	1	1	0	1	1	1	1	1	1	1	16	-	-
26250592	c4773	uridine phosphorylase		1	1	1	1	1	0	1	1	1	1	0	1	1	1	1	1	1	1	16	cl00303	PNP_UDP_1, Phosphorylase family
26250593	c4774	hypothetical protein c4774	1	1	1	1	0	0	0	0	0	0	0	0	0	0	0	0	0	0	0	3	cl00772	-
26250594	c4775	hypothetical protein c4775	1	1	1	1	0	0	0	0	0	0	0	0	0	0	0	0	0	0	0	3	-	-
26250595	c4776	hypothetical protein c4776	1	1	1	1	0	0	0	0	0	0	0	0	0	0	0	0	0	0	0	3	cl01242	Bug, Bordetella uptake gene (bug) product, solute receptor?
26250596	c4777	2-dehydro-3-deoxy-6-phosphogalactonate aldolase	1	1	1	1	0	0	0	0	0	0	0	0	0	0	0	0	0	0	0	3	cd00452	KDPG_aldolase, KDPG and KHG aldolase
26250597	c4778	hypothetical protein c4778	1	1	1	1	0	0	0	0	0	0	0	0	0	0	0	0	0	0	0	3	cl01517	DGOK, 2-keto-3-deoxy-galactonokinase
26250598	c4779	Putative transcriptional regulator		1	1	1	0	0	0	0	0	0	0	0	0	0	0	0	0	0	0	3	pfam01614	IclR, Bacterial transcriptional regulator
26250599	c4780	hypothetical protein c4780		1	1	1	1	1	1	1	1	1	1	1	1	1	1	1	1	1	1	18	-	-
26250643	c4828	Putative dehydrogenase		1	1	1	1	0	0	0	0	0	1	0	1	1	0	0	0	0	0	7	pfam08240	-
26250644	c4829	hypothetical protein c4829		1	1	1	1	0	0	0	0	0	1	0	1	1	0	0	0	0	0	7	cl09119	Sugar_tr, Sugar (and other) transporter
26250645	c4830	Shikimate transporter		1	1	1	1	0	0	0	0	0	1	0	1	1	0	0	0	0	1	8	cl09119	Sugar_tr, Sugar (and other) transporter
26250738	c4924	Putative hippuricase	1	1	1	1	1	0	0	0	0	0	0	0	0	0	0	1	1	0	1	7	COG1473	AbgB, Metal-dependent amidase/aminoacylase/carboxypeptidase
26250739	c4925	Putative citrate permease	1	1	1	1	1	0	0	0	0	0	0	0	0	0	0	1	1	0	1	7	cl09119	Sugar_tr, Sugar (and other) transporter
26250740	c4926	yijC		1	1	1	1	1	1	1	1	1	1	1	1	1	1	1	1	1	1	18	pfam00440	TetR_N, Bacterial regulatory proteins, tetR family, FabR?
26250793	c4981	Putative oxidoreductase	1	1	1	1	1	1	0	0	0	0	0	0	1	0	0	1	1	1	1	10	COG1063	Tdh, Threonine dehydrogenase and related Zn-dependent dehydrogenases
26250794	c4982	PTS system, mannose-specific IID component	1	1	1	1	1	1	0	0	0	0	0	0	1	0	0	1	1	1	1	10	cl01507	PTS system mannose/fructose/sorbose family IID component
26250795	c4983	PTS system, mannose-specific IIC component	1	1	1	1	1	1	0	0	0	0	0	0	1	0	0	1	1	1	1	10	cl01506	--
26250796	c4984	Putative sorbose PTS component	1	1	1	1	1	1	0	0	0	0	0	0	1	0	0	1	1	1	0	9	cl00021	IIB component
26250797	c4985	Putative sorbose PTS component		1	1	1	1	1	0	0	0	0	0	0	1	0	0	1	1	1	0	9	cd00006	IIA component
26250798	c4986	D-glucitol-6-phosphate dehydrogenase	1	1	1	1	1	1	0	0	0	0	0	0	1	0	0	1	1	1	0	9	cl09931	AdoHcyase, S-adenosyl-L-homocysteine hydrolase (AdoHycase)
26250799	c4987	Putative transcriptional regulator of sorbose uptake and utilization genes	1	1	1	1	1	1	0	0	0	0	0	0	1	0	0	1	1	1	1	10	COG2390	DeoR, Transcriptional regulator, contains sigma factor-related N-terminal domain
26250832	c5020	qor		1	1	1	1	1	1	1	1	0	1	1	1	1	1	1	1	1	1	17	PRK10754	quinone oxidoreductase, NADPH-dependent
26250833	c5021	Putative oxidoreductase		0	0	1	0	0	0	0	0	0	0	0	0	0	0	0	0	0	0	1	COG0029	NadB, Aspartate oxidase
26250834	c5022	Putative transmembrane transport protein		0	0	1	0	0	0	0	0	0	0	0	0	0	0	0	0	0	0	1	cl09119	Sugar_tr, Sugar (and other) transporter
26250835	c5023	Putative crotonase		0	0	1	0	0	0	0	0	0	0	0	0	0	0	0	0	0	0	1	PRK05809	3-hydroxybutyryl-CoA dehydratase
26250836	c5024	Putative propionate CoA-transferase		0	0	1	0	0	0	0	0	0	0	0	0	0	0	0	0	0	0	1	COG4670	Acyl CoA:acetate/3-ketoacid CoA transferase
26250837	c5025	Putative regulator		0	0	1	0	0	0	0	0	0	0	0	0	0	0	0	0	0	0	1	COG1609	PurR, Transcriptional regulators
26250842	c5030	-		1	1	1	1	0	0	0	0	0	0	0	0	0	0	0	0	0	0	4	cl01238	NadR, Predicted ATPase/kinase involved in NAD metabolism
26250843	c5031	tyrB		1	1	1	1	1	0	0	1	1	1	1	1	1	1	1	1	1	1	16	PRK09257	aromatic amino acid aminotransferase
26250844	c5032	2-oxoglutarate dehydrogenase E1 component	1	1	1	1	1	0	0	0	0	0	0	0	0	0	0	0	0	0	0	4	PRK09404	kgd, alpha-ketoglutarate decarboxylase
26250845	c5033	hypothetical protein c5033	1	1	1	1	1	0	0	0	0	0	0	0	0	0	0	0	0	0	0	4	-	-
26250846	c5034	Dihydrolipoamide succinyltransferase component of 2-oxoglutarate dehydrogenase complex	1	1	1	1	1	0	0	0	0	0	0	0	0	0	0	0	0	0	0	4	PRK11857	dihydrolipoamide acetyltransferase
26250847	c5035	Putative 2-oxoglutarate dehydrogenase	1	1	1	1	1	0	0	0	0	0	0	0	0	0	0	0	0	0	0	4	PRK06327	dihydrolipoamide dehydrogenase
26250848	c5036	Succinyl-CoA synthetase beta chain	1	1	1	1	1	0	0	0	0	0	0	0	0	0	0	0	0	0	0	4	PRK00696	sucC, succinyl-CoA synthetase subunit beta
26250849	c5037	Succinyl-CoA synthetase alpha chain	1	1	1	1	1	0	0	0	0	0	0	0	0	0	0	0	0	0	0	4	PRK05678	succinyl-CoA synthetase subunit alpha
26250850	c5038	Putative membrane-bound protein	1	1	1	1	1	0	0	0	0	0	0	0	0	0	0	0	0	0	0	4	COG0471	CitT, Di- and tricarboxylate transporters
26250851	c5039	Putative lactate dehydrogenase	1	1	1	1	1	0	0	0	0	0	0	0	0	0	0	0	0	0	0	4	cl00900	Ldh_2, Malate/L-lactate dehydrogenase
26250852	c5040	Putative c4-dicarboxylate transport transcriptional Regulatory protein	1	1	1	1	1	0	0	0	0	0	0	0	0	0	0	0	0	0	0	4	COG2204	AtoC, Response regulator containing CheY-like receiver
26250853	c5041	Putative transport sensor protein		1	1	1	1	0	0	0	0	0	0	0	0	0	0	0	0	0	0	4	COG4191	Signal transduction histidine kinase regulating C4-dicarboxylate transport
26251105	c5298	Hexuronate transporter		1	1	1	1	0	0	0	0	0	0	0	0	0	0	0	0	0	0	4	cl09119	Sugar_tr, Sugar (and other) transporter
26251106	c5299	Putative oxidoreductase		1	1	1	1	0	1	1	1	1	1	1	0	1	0	0	0	0	0	11	PRK06263	sdhA, succinate dehydrogenase flavoprotein subunit (part)
26251107	c5300	Putative acetyl-CoA:acetoacetyl-CoA transferase		1	1	1	1	0	1	1	1	1	1	1	0	1	0	0	0	0	0	11	COG4670	Acyl CoA:acetate/3-ketoacid CoA transferase
26251108	c5301	hypothetical protein c5301		1	1	1	1	0	1	1	1	1	1	1	0	1	0	0	0	0	0	11	COG1024	CaiD, Enoyl-CoA hydratase/carnithine racemase
26251109	c5302	hypothetical protein c5302		1	1	1	1	0	1	1	1	1	1	1	0	1	0	0	0	1	0	12	COG1082	IolE, Sugar phosphate isomerases/epimerases
26251110	c5303	Putative oxoacyl reductase		1	1	1	1	0	1	1	1	1	1	1	0	1	0	0	0	1	0	12	PRK05557	fabG, 3-ketoacyl-(acyl-carrier-protein) reductase
26251154	c5346	hypothetical protein c5346		1	1	1	0	0	0	0	0	0	0	0	0	0	0	0	0	0	0	3	COG1438	ArgR, Arginine repressor
26251155	c5347	hypothetical protein c5347		1	1	1	0	0	0	0	0	0	0	0	0	0	0	0	0	0	0	3	cl09110	ArsB_NhaD_permease, Anion permease ArsB/NhaD
26251156	c5348	Ornithine carbamoyltransferase chain I		1	1	1	0	0	0	1	0	0	1	0	0	0	0	0	0	1	1	7	PRK02102	--
26251157	c5349	Carbamate kinase		1	1	1	0	0	0	0	0	0	0	0	0	0	0	0	0	0	0	3	PRK12353	--
26251158	c5350	Putative arginine deiminase		1	1	1	0	0	0	0	0	0	0	0	0	0	0	0	0	0	0	3	COG2235	ArcA, Arginine deiminase
26251159	c5351	hypothetical protein c5351		1	1	1	0	0	0	0	0	0	0	0	0	0	0	0	0	0	0	3	-	-
Totals			54	112	112	121	87	30	20	20	25	18	23	22	18	23	7	26	26	17	21
